# Supplementary material for: Determinants of childhood vaccination among children aged 12–23 months in Ethiopia: a community-based cross-sectional study
Source: PubMed Central journal article supplement — BMJ Open. 2023 Mar 8;13(3):e069278. doi: 10.1136/bmjopen-2022-069278 (PMC10008449; doi:10.1136/bmjopen-2022-069278), 2023-03-08
Supplement: bmjopen-2022-069278.draft_revisions.pdf [file bmjopen-2022-069278.draft_revisions.pdf]

# BMJ Open

BMJ Open is committed to open peer review. As part of this commitment we make the peer review history of every article we publish publicly available.

When an article is published we post the peer reviewers' comments and the authors' responses online. We also post the versions of the paper that were used during peer review. These are the versions that the peer review comments apply to.

The versions of the paper that follow are the versions that were submitted during the peer review process. They are not the versions of record or the final published versions. They should not be cited or distributed as the published version of this manuscript.

BMJ Open is an open access journal and the full, final, typeset and author-corrected version of record of the manuscript is available on our site with no access controls, subscription charges or pay-per-view fees (<http://bmjopen.bmj.com>).

If you have any questions on BMJ Open's open peer review process please email [info.bmjopen@bmj.com](mailto:info.bmjopen@bmj.com)

# BMJ Open

## **Determinants of childhood vaccination among children aged 12–23 months in Ethiopia: A multilevel analysis using 2019 Ethiopia mini demographic and health survey**

|                               |                                                                                                                                                                                            |
|-------------------------------|--------------------------------------------------------------------------------------------------------------------------------------------------------------------------------------------|
| Journal:                      | <i>BMJ Open</i>                                                                                                                                                                            |
| Manuscript ID                 | bmjopen-2022-069278                                                                                                                                                                        |
| Article Type:                 | Original research                                                                                                                                                                          |
| Date Submitted by the Author: | 15-Oct-2022                                                                                                                                                                                |
| Complete List of Authors:     | Sako, Sewunet; Arba Minch University, Department of Health Informatics Gilano, Girma; Arba Minch University, Department of Health Informatics Samuel, Hailegebreal; Arba Minch University, |
| Keywords:                     | Community child health < PAEDIATRICS, PREVENTIVE MEDICINE, PUBLIC HEALTH                                                                                                                   |
|                               |                                                                                                                                                                                            |

SCHOLARONE™  
Manuscripts

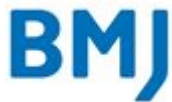

I, the Submitting Author has the right to grant and does grant on behalf of all authors of the Work (as defined in the below author licence), an exclusive licence and/or a non-exclusive licence for contributions from authors who are: i) UK Crown employees; ii) where BMJ has agreed a CC-BY licence shall apply, and/or iii) in accordance with the terms applicable for US Federal Government officers or employees acting as part of their official duties; on a worldwide, perpetual, irrevocable, royalty-free basis to BMJ Publishing Group Ltd ("BMJ") its licensees and where the relevant Journal is co-owned by BMJ to the co-owners of the Journal, to publish the Work in this journal and any other BMJ products and to exploit all rights, as set out in our [licence](#).

The Submitting Author accepts and understands that any supply made under these terms is made by BMJ to the Submitting Author unless you are acting as an employee on behalf of your employer or a postgraduate student of an affiliated institution which is paying any applicable article publishing charge ("APC") for Open Access articles. Where the Submitting Author wishes to make the Work available on an Open Access basis (and intends to pay the relevant APC), the terms of reuse of such Open Access shall be governed by a Creative Commons licence – details of these licences and which [Creative Commons](#) licence will apply to this Work are set out in our licence referred to above.

Other than as permitted in any relevant BMJ Author's Self Archiving Policies, I confirm this Work has not been accepted for publication elsewhere, is not being considered for publication elsewhere and does not duplicate material already published. I confirm all authors consent to publication of this Work and authorise the granting of this licence.

1  
2  
3 **1 Determinants of childhood vaccination among children aged 12–23 months in Ethiopia: A**  
4 **2 multilevel analysis using 2019 Ethiopia mini demographic and health survey**  
5  
6  
7

8  
9  
10  
11  
12  
13  
14  
15  
16  
17  
18  
19  
20  
21  
22  
23  
24  
25  
26  
27  
28  
29  
30  
31  
32  
33  
34  
35  
36  
37  
38  
39  
40  
41  
42  
43  
44  
45  
46  
47  
48  
49  
50  
51  
52  
53  
54  
55  
56  
57  
58  
59  
60

3  
4 Sewunet Sako<sup>1\*</sup>, Girma Gilano<sup>1</sup> and Samuel Hailegebreal<sup>1</sup>

5  
6 1. Department of Health Informatics, School of Public Health, College of Medicine and Health  
7 Sciences, Arba Minch University, Arba Minch, Ethiopia

8  
9 \* [zesew1lalem@gmail.com](mailto:zesew1lalem@gmail.com) – (SS)

10  
11 P.O. Box 21

12 Word count: 4276

## 13 Abstract

14 **Objective:** vaccination is a highly cost-effective critical element than any other healthcare service  
15 in reaching larger population globally. Due to different reasons, we are facing new emergence and  
16 resurgence of vaccine preventable diseases currently. Thus, study was aimed at identifying current  
17 prevalence and associated factors in Ethiopia.

18 **Design:** Community based cross-sectional study

19 **Setting:** We used data from 2019 Ethiopia Mini Demographic and Health Survey (EMDHS). The  
20 survey included all the nine regional states and two city administrations of Ethiopia.

21 **Participants:** A weighted sample of 1,008 children 12-23 months of age was included in the  
22 analysis.

23 **Main outcome measures:** Multilevel proportional odds model was fitted to identify determinants  
24 of childhood vaccination status. In the final model, variables with p-value of less than 5% and an  
25 adjusted odds ratio with a 95% CI reported.

26 **Result:** The full childhood vaccination coverage of Ethiopia was 39.09% (95% CI: 36.06%,  
27 42.28). Maternal education, being in union, keeping vaccination cards, children received Vitamin  
28 A<sub>1</sub>, living in Afar, Somali, Gambela, Harari, Dire Dawa regions, and rural residents were factors  
29 significantly associated with childhood vaccination.

30 **Conclusion:** The coverage of full childhood vaccination in Ethiopia was low remained unchanged  
31 since 2016. The study identified both the individual- and community-level factors affected the  
32 vaccination status. Accordingly, public health intervention targeted to these identified factors can  
33 increase childhood full vaccination status.

34 **Keywords:** full vaccination; multilevel; ordinal, 12-23 months children; Ethiopia

### 35 **Strengths and limitations of this study**

- 36 • This study used most recent nationwide secondary data that shows proportion of EPI  
37 coverage among children aged 12–23 months in Ethiopia.
- 38 • Data of 1,008 children was extracted from the 2019 Ethiopia mini demographic and health  
39 survey (EMDHS) dataset for this analysis.
- 40 • We used multilevel proportional odds model to overcome the hierarchical nature of  
41 EMDHS data and to identify both individual and community-level factors of EPI.
- 42 • Recall bias is the most relevant limitation of the study.

## 45 Introduction

46 According to the United Nations Children Fund (UNICEF), vaccination is a dynamic constituent  
47 of frontline health care to access larger population compared to any health or social activities by  
48 reducing global annual death by significant proportion(1–4). It save lives and protects peoples’  
49 health, improves countries’ productivity and resilience, and helps to ensure a safer and healthier  
50 world(5,6). Vaccine preventable diseases become the big burden in war affected parts of the world  
51 and underdeveloped countries like Ethiopia(7); despite the existence of highly cost-effective  
52 vaccines on global markets(8). The global inequality health care distribution forced many low and  
53 middle income countries to live under the bundle of pestilent cumulative old health problems(9).  
54 Regardless of advancement and attainments of immunization, new emergence and resurgence of  
55 vaccine preventable diseases become very common. There are still people who deprived of  
56 accessing immunization in some countries which are becoming the reason for of vaccine  
57 preventable diseases at large-scale as the disparities honestly admitted by World Health  
58 Organization (WHO) and other studies 2018(10–12). This fact is also true in Ethiopia where  
59 studies described that educated and rich people get their children vaccinated by nearly 30% to 31%  
60 in the country(13). Due to this fact, globally, an estimated 6.6 million children still die every single  
61 year and half of the deaths would have been prevented by vaccination(14).

62 As Africa is of the regions severely affected by global imbalanced immunization resources, the  
63 overview of the proportion of the fully immunization become the apparent reflection of the fact  
64 (1,15). Some evidences indicated that global vaccine coverage is decreasing in some countries and  
65 at global level(16). The study summarized the Demographic Health Surveys (DHS) of Sub-  
66 Saharan countries showed that the coverage was limited to 59.40% in 2021(17). In Mogadishu full  
67 immunization coverage was 45.2% and (41.4%) in 2020 and 2021 respectively(18,19). In Togo

1  
2  
3 68 the full immunization coverage was 69.3% in Lome district in 2019(20). In Ethiopia a study in  
4  
5 69 Southeast Ethiopia showed that full immunization coverage was 76.8%(21); however, the most  
6  
7  
8 70 recent pooled prevalence of vaccination amongst 12–23 month old children in the country was  
9  
10 71 47% in 2020(22). EDHS 2016 demonstrated that coverage of full vaccination was 38.3%(23). The  
11  
12 72 magnitude of full vaccination increased from 14.3% in 2000 to 38.5% in 2016 from other  
13  
14  
15 73 study(24). All evidence indicates the most recent coverage of full vaccination is not adequate as  
16  
17 74 per early increase referenced.

18  
19  
20 75 There are a number of factors that are superimposed the argument that resources disparities might  
21  
22 76 be the only cause of poor coverage. A systematic review conducted in Sub-Saharan countries  
23  
24  
25 77 showed lack of knowledge of immunization, distance to access point, financial deprivation, lack  
26  
27 78 of partners support, and distrust in vaccines and immunization programs were the barrier to  
28  
29 79 utilization(25). The absence of immunization card, respondents' sex, level of education, marital  
30  
31 80 status, and organization of health system has been mentioned in another study(20). A study  
32  
33  
34 81 included larger sub Saharan countries showed maternal education, health facility delivery, fathers  
35  
36 82 secondary education and above, ANC visits, PNC visit, wealth index, media exposure, and  
37  
38 83 distance to health facility affected full vaccination coverage(17). In Ethiopia, from previous four  
39  
40  
41 84 EDHS, postnatal check-up, awareness, regional difference, educational status, residence, and  
42  
43 85 women wealth index influenced full vaccination(13,22,26). From other study antenatal care visit,  
44  
45 86 higher level of maternal education, mothers' good knowledge on immunization, short distance to  
46  
47 87 health facility, and being born in health institutions determined complete immunization of a  
48  
49 88 child(27).

50  
51  
52  
53 89 In summary, evidences of poor complete immunization varied from vaccination resource  
54  
55 90 limitation to the individual and community constraining factors. The initial hope of eradicating



1  
2  
3 91 vaccine preventable diseases become just a hope and the current reports showed coverage  
4  
5 92 dwindling again. Despite those mentioned factors, researching for new events leading to decreased  
6  
7  
8 93 coverage which become an issue because of emerging and remerging vaccine preventable  
9  
10 94 outbreaks deserve further country level analysis. Therefore, this study aimed discovering further  
11  
12 95 prevalence and associated factors to assist in policy improvements.  
13  
14

## 15 96 **Methods**

### 16 17 18 97 **Study design**

19  
20  
21 98 This study used the 2019 cross-sectional data of Ethiopian mini demographic and health survey  
22  
23 99 (EMDHS). The survey dataset used in this analysis was obtained from demographic and health  
24  
25 100 survey website (<http://dhsprogram.com/data/>) after getting permission to access the data. The mini  
26  
27 101 survey was conducted in March 2019 to June 2019 for the second time in Ethiopia. The Ethiopian  
28  
29 102 Public Health Institute (EPHI) in collaboration with Central Statistical Agency (CSA) and Federal  
30  
31 103 Ministry of Health (FMOH) implemented a nationally representative household survey.  
32  
33  
34

### 35 104 **Participants**

36  
37  
38 105 The 2019 EMDHS used the sampling frame created for the upcoming Ethiopia population and  
39  
40 106 housing census list of 149,093 enumeration areas (EA). Participants of the study were selected  
41  
42 107 through a stratified two-stage cluster sampling technique. Initially, each region of the country was  
43  
44 108 stratified into urban and rural areas. Probability proportional to EA size was used to select 305  
45  
46 109 EAs (93 in urban and 212 in rural areas). In the second stage, lists of households were used as a  
47  
48 110 sampling frame to select 30 households per cluster by equal probability systematic selection  
49  
50 111 technique. Eligible women for the interview were all women aged 15-49 and residents of the  
51  
52 112 selected households. Accordingly, 8,885 women were interviewed out of 9,012 eligible women  
53  
54  
55  
56  
57  
58  
59  
60

1  
2  
3 113 identified for interviews, giving a response rate of 98.6%. All living children age 12–23 months at  
4  
5 114 the time of the survey were the source population of the study. The details of the survey methods  
6  
7  
8 115 and procedures are available in the 2019 Ethiopia Mini Demographic and Health Survey report  
9  
10 116 (28).

### 117 **Eligibility criteria**

118 All children born in the 2 years preceding the survey were included in the analysis. However,  
119 children who were not alive at the time of the survey were excluded from this study. Accordingly,  
120 data of 1,008 children who had born in the last 2 years and surviving were extracted from the 2019  
121 EMDHS datasets for this analysis.

### 122 **Study setting**

123 The EMDHS survey included all the nine regions and two city administrations of the country.  
124 Ethiopia is the second most populous country from Africa and located in the horn of Africa.

### 125 **Measurements of variables of the Study**

#### 126 **Dependent variable**

127 Child vaccination status was the outcome variable of the study. The outcome variable was ordered  
128 into three categories: not vaccinated, partially vaccinated and fully vaccinated.

129 **Fully vaccinated:** is a child that has received one dose of Bacille Calmette-Guerin (BCG), three  
130 doses of pentavalent, three doses of polio, two doses of Rota, three doses of pneumococcal  
131 conjugate vaccine (PCV), and one dose of measles (MCV1).

132 **Partially vaccinated:** is a child who had missed at least one or more of the thirteen vaccines/doses.

133 **Not vaccinated:** is a child that has not received any vaccine at all.

1  
2  
3 134 The interviewers of the 2019 EMDHS obtained information on vaccination coverage from written  
4  
5 135 vaccination cards (infant immunization card and other health cards), from mothers' verbal reports,  
6  
7  
8 136 and from health facility records. They request mothers who born child in the three preceding years  
9  
10 137 of the survey to show the infant immunization card or health card. Subsequently, they copy the  
11  
12 138 dates of each vaccination given in the corresponding questionnaire. Similarly, they ask mother  
13  
14  
15 139 who did not kept the cards to recall whether the child received that specific vaccination and the  
16  
17 140 number of doses that the child received. In addition, to complement these data (information  
18  
19 141 collected based on the mother's recall) the field supervisor collect complementary vaccination  
20  
21 142 records from health facility for a child who visited a health facility and missed vaccination data.  
22  
23

### 24 143 **Independent variables**

25  
26  
27 144 In this study, we considered both individual and community-level independent variables. The  
28  
29 145 individual-level variables included were maternal age, maternal educational level, religion, marital  
30  
31 146 status, relationship to household head, sex of household head, wealth index, number of antenatal  
32  
33 147 care (ANC) visits, place of delivery, utilized postnatal care, presence of vaccination document,  
34  
35  
36 148 birth order number, preceding birth interval, sex of child, received vitamin A1, total children ever  
37  
38 149 born, and number of under five children in household. While region, type of place of residence,  
39  
40  
41 150 community women education, community poverty, and community ANC utilization were  
42  
43 151 community-level factors of the study. Region is a grouping of the first administrative level of  
44  
45 152 Ethiopia. During the survey period, there were 9 regions and 2 city administrations in the country  
46  
47  
48 153 namely, Tigray, Amhara, Afar, Oromia, Somali, Benishangul-Gumuz, South nations nationalities  
49  
50 154 and people's region (SNNPR), Gambela, Harari, and two city administrations (Addis Ababa and  
51  
52 155 Dire Dawa). Moreover, community women education, community poverty and community ANC  
53  
54 156 utilization were community-level variables derived by aggregating individual-level factors. They  
55  
56  
57  
58  
59  
60

1  
2  
3 157 were categorized as “low” or “high” based on the median value since the EMDHS were not  
4  
5 158 normally distributed.  
6  
7

### 8 159 **Data processing and statistical analysis**

10 160 The data were cleaned, re-coded and analyzed using STATA/SE version 14.0. Descriptive  
11  
12  
13 161 statistics were used to summarize both the individual- and community-level variables. Sample  
14  
15 162 weight was applied to manage for sampling errors and non-responses. The hierarchical nature of  
16  
17 163 the DHS data (or sampling methods DHS apply) violates the assumption of independence or lack  
18  
19 164 of correlation of the residuals. In the DHS survey, observations are interdependent as participants  
20  
21 165 nested in the same cluster are more likely to function in the same way than participants nested in  
22  
23 166 different clusters in terms of the outcome of interest. As a result, we used a two-level multilevel  
24  
25 167 proportional odds model since a single-level traditional statistical model might not be adequate to  
26  
27 168 control for the clustering effect. Moreover, we used multilevel proportional odds model to consider  
28  
29 169 the natural ordering of the response variable (not vaccinated, partially vaccinated and fully  
30  
31 170 vaccinated). Accordingly, four consecutive models were built to identify determinants of child  
32  
33 171 vaccination in Ethiopia. We first fitted the null model or the intercept only model. Then, model 1  
34  
35 172 was fitted with the individual-level variables only that were initially significant at p-value of <  
36  
37 173 0.25. Similarly, model 2 (with only community-level factors) was constructed. Finally, model 3 or  
38  
39 174 the mixed-effects model was fitted with both individual- and community-level factors. The intra-  
40  
41 175 class correlation coefficient (ICC) was used to determine the clustering effect or community  
42  
43 176 variation and it was calculated using the following formula.  
44  
45  
46  
47  
48  
49

50  
51 177 
$$\text{ICC} = \frac{V_A}{V_A + \frac{\pi^2}{3}}$$
  
52  
53  
54  
55  
56  
57  
58  
59  
60

1  
2  
3  
4 178 Where:  $V_A$  is community level variance and  $\frac{\pi^2}{3}$  is individual level variance, which is equal to 3.29.

5  
6 179 On the other hand, Proportional Change in Variance (PCV), Median Odds Ratio (MOR), and

7  
8 180 Deviance were checked by using the following formulas to determine the fitness of the model.

9  
10  
11 181  $PCV = \frac{V_0 - V_i}{V_0}$ . Where:  $V_0$  is variance in the null model and  $V_i$  is variance in the consecutive models.

12  
13  
14 182  $MOR = e^{0.95V_i}$  where:  $V_i$  indicates that cluster variance. The model with the lowest deviance

15  
16 183 (Model III) was selected as the best-fitted model. Furthermore, the proportional odds assumption

17  
18 184 that states the effect of each factor is assumed to be equal across the outcome categories was

19  
20 185 examined by score test. Variance Inflation Factor (VIF) was tested to assess the presence of

21  
22 186 multicollinearity among the independent variables and the mean VIF was found to be 1.60,

23  
24 187 indicating absence of multicollinearity (min 1.03 and max 2.76). In bivariable analysis, variables

25  
26 188 with p-value less than 0.25 were considered as candidate variables for the multivariable multilevel

27  
28 189 proportional odds analysis. Finally, in the multivariable analysis variables with p-value less than

29  
30 190 5% and adjusted proportional odds ratio (APOR) with the 95% confidence interval were reported

31  
32 191 as statistically significant variables with child vaccination in Ethiopia.

## 33 34 35 36 37 192 **Patient and public involvement**

38  
39 193 Patients and/or the public were not involved in the design, or conduct, or reporting, or

40  
41 194 dissemination plans of this research.

## 42 43 44 195 **Result**

### 45 46 47 196 **Individual and community-level characteristics of mothers and children**

48  
49 197 The current study included 1,008 mothers who have children aged 12-23 months. Out of the total

50  
51 198 respondents, more than half (52.78%) were in the range of 25-34, nearly half (48.91%) did not

52  
53 199 attended education, and almost one-third (32.14%) were Orthodox religion followers. In this study,

four out of ten mothers (39.98%) were from high income households and the majorities (94.05%) were currently in union. Among the participants, less than half (44.15%) were practiced home delivery, nearly a quarter (24.31%) had no ANC visit, and almost one-tenth (13.99%) received PNC service. Majority of the mothers (71.73%) kept immunization document and 88.1% of the interviewed mothers have less than or equal to 2 under five children in their households. From the total number of children, half (50.30%) were males, 22.72% were first-born, and 59.33% were received the most recent vitamin A1. Three-fourth of respondents (73.51%) was from rural areas and 12.6% were from Oromia region of the country (Table 1).

**Table 1: Individual and community-level characteristics of mothers of children aged 12-23 months in Ethiopia, 2019**

| Variables                 | Frequency (n) | Percentage (%) |
|---------------------------|---------------|----------------|
| <b>Maternal age</b>       |               |                |
| 15-24                     | 298           | 29.56          |
| 25-34                     | 532           | 52.78          |
| 35-49                     | 178           | 17.66          |
| <b>Maternal education</b> |               |                |
| No education              | 493           | 48.91          |
| Primary                   | 342           | 33.93          |
| Secondary                 | 99            | 9.82           |
| Higher                    | 74            | 7.34           |
| <b>Marital status</b>     |               |                |
| Not in union              | 60            | 5.95           |

|                                       |     |       |
|---------------------------------------|-----|-------|
| <b>In union</b>                       | 948 | 94.05 |
| <b>Religion</b>                       |     |       |
| <b>Orthodox</b>                       | 324 | 32.14 |
| <b>Protestant</b>                     | 177 | 17.56 |
| <b>Muslim</b>                         | 481 | 47.72 |
| <b>Others</b>                         | 26  | 2.58  |
| <b>Relationship to household head</b> |     |       |
| <b>Household head</b>                 | 167 | 16.57 |
| <b>Wife or husband</b>                | 730 | 72.42 |
| <b>Others</b>                         | 111 | 11.01 |
| <b>Sex of household head</b>          |     |       |
| <b>Male</b>                           | 797 | 79.07 |
| <b>Female</b>                         | 211 | 20.93 |
| <b>Wealth index</b>                   |     |       |
| <b>Poor</b>                           | 469 | 46.53 |
| <b>Middle</b>                         | 136 | 13.49 |
| <b>Rich</b>                           | 403 | 39.98 |
| <b>Number of ANC visits</b>           |     |       |
| <b>None</b>                           | 245 | 24.31 |
| <b>1-3 times</b>                      | 313 | 31.05 |
| <b>4 and above</b>                    | 450 | 44.64 |
| <b>Place of delivery</b>              |     |       |
| <b>Home</b>                           | 445 | 44.15 |

|                                         |     |       |
|-----------------------------------------|-----|-------|
| <b>Health facility</b>                  | 563 | 55.85 |
| <b>PNC service</b>                      |     |       |
| <b>No</b>                               | 836 | 86.01 |
| <b>Yes</b>                              | 136 | 13.99 |
| <b>Sex of child</b>                     |     |       |
| <b>Male</b>                             | 507 | 50.30 |
| <b>Female</b>                           | 501 | 49.70 |
| <b>Birth order number</b>               |     |       |
| <b>1<sup>st</sup> born</b>              | 229 | 22.72 |
| <b>2<sup>nd</sup> to 3<sup>rd</sup></b> | 372 | 36.90 |
| <b>4<sup>th</sup> to 5<sup>th</sup></b> | 204 | 20.24 |
| <b>6<sup>th</sup> and above</b>         | 203 | 20.14 |
| <b>Presence of vaccination document</b> |     |       |
| <b>No</b>                               | 285 | 28.27 |
| <b>Yes</b>                              | 723 | 71.73 |
| <b>Preceding birth order</b>            |     |       |
| <b>&lt; 24 months</b>                   | 186 | 18.45 |
| <b>24-48</b>                            | 357 | 35.42 |
| <b>48 and above</b>                     | 465 | 46.13 |
| <b>Received Vitamin A1</b>              |     |       |
| <b>No</b>                               | 410 | 40.67 |
| <b>Yes</b>                              | 598 | 59.33 |
| <b>Total children ever born</b>         |     |       |



|                                              |     |       |
|----------------------------------------------|-----|-------|
| <b>1-3 children</b>                          | 598 | 59.33 |
| <b>4-6 children</b>                          | 278 | 27.58 |
| <b>7 and above</b>                           | 132 | 13.10 |
| <b>Number of &lt;5 children in household</b> |     |       |
| <b>≤ 2</b>                                   | 888 | 88.10 |
| <b>&gt; 2</b>                                | 120 | 11.90 |
| <b>Region</b>                                |     |       |
| <b>Tigray</b>                                | 93  | 9.23  |
| <b>Amhara</b>                                | 111 | 11.01 |
| <b>Afar</b>                                  | 99  | 9.82  |
| <b>Oromia</b>                                | 127 | 12.60 |
| <b>Somali</b>                                | 85  | 8.43  |
| <b>Benishabgul</b>                           | 83  | 8.23  |
| <b>SNNPR</b>                                 | 116 | 11.51 |
| <b>Gambela</b>                               | 77  | 7.64  |
| <b>Harari</b>                                | 73  | 7.24  |
| <b>Addis Ababa</b>                           | 64  | 6.35  |
| <b>Dire Dawa</b>                             | 80  | 7.94  |
| <b>Type of place of residence</b>            |     |       |
| <b>Urban</b>                                 | 267 | 26.49 |
| <b>Rural</b>                                 | 741 | 73.51 |
| <b>Community women education</b>             |     |       |
| <b>Low</b>                                   | 468 | 46.43 |

|                                  |     |       |
|----------------------------------|-----|-------|
| <b>High</b>                      | 540 | 53.57 |
| <b>Community poverty</b>         |     |       |
| <b>Low</b>                       | 495 | 49.11 |
| <b>High</b>                      | 513 | 50.89 |
| <b>Community ANC utilization</b> |     |       |
| <b>Low</b>                       | 468 | 46.43 |
| <b>High</b>                      | 540 | 53.57 |

## 210 **Childhood vaccination status in Ethiopia**

211 The full vaccination coverage among children aged 12-23 months in Ethiopia was 39.09% (95%  
 212 CI: 36.06%, 42.28) (Fig. 1). On the other hand, two in ten children (22.32%) of 12-23 months have  
 213 not received any vaccination during three years before the 2019 survey period. Among the total  
 214 children of 12-23 months included in the study, 70.24% received BCG, 57.84% received the third  
 215 dose of pentavalent, 55.75% received the third dose of polio, 60.62% received the second dose of  
 216 rotavirus vaccine, 55.16% received the third dose of PCV, and 57.04% received the first dose of  
 217 measles vaccination (Fig. 2).

## 218 **Factors affecting child vaccination in Ethiopia**

### 219 **The fixed effect analysis result**

220 The multivariable analysis showed that maternal educational level, maternal age, marital status,  
 221 presence of vaccination document, received Vitamin A<sub>1</sub>, region, place of residence, and  
 222 community women education were significantly associated variables with childhood vaccination.  
 223 Children who were born from mothers who attended primary, secondary, and higher schools were  
 224 2.2 [AOR=2.16; 95% CI: 1.43-3.26], 2 [AOR=2.02; 95% CI: 1.07-3.79], and 2.7 [AOR=2.67; 95%

225 CI: 1.25-5.71] respectively times more likely to be partially or fully vaccinated as compared to  
 226 children whose mothers have no education. The odds to be partially or fully vaccinated was 1.8  
 227 [AOR=1.79; 95% CI: 1.08-2.99] times higher among children whose mothers were in the age range  
 228 of 35-49 as compared to those children whose mothers were in the age range of 15-19. Children  
 229 whose mothers were currently in union were 2.2 [AOR=2.21; 95% CI: 1.06-4.58] times more  
 230 likely to be partially or fully vaccinated than their counterparts. Children whose mothers kept  
 231 vaccination cards were 26 [AOR=26.18; 95% CI: 15.75-43.53] times more likely to be partially or  
 232 fully vaccinated as compared to those children whose mothers did not kept vaccination cards.  
 233 Compared with children who have not received Vitamin A<sub>1</sub> (the most recent), the likelihood to be  
 234 partially or fully vaccinated was 4 [AOR=4.14; 95% CI: 2.9-5.9] times higher for children who  
 235 received Vitamin A<sub>1</sub>. Children from Afar [AOR=0.14; 95% CI: 0.04-0.45], Somali [AOR=0.19;  
 236 95% CI: 0.06-0.60], Gambela [AOR=0.22; 95% CI: 0.06-0.77], Harari [AOR=0.14; 95% CI: 0.04-  
 237 0.52], and Dire Dawa [AOR=0.23; 95% CI: 0.06-0.79] regions were less likely to be partially or  
 238 fully vaccinated as compared to those children from Tigray region. Children living in rural areas  
 239 were 47% [AOR=0.53; 95% CI: 0.30-0.93] less likely to be partially or fully vaccinated than  
 240 children living in urban areas of the country. Children in the community with high level of maternal  
 241 education had 47% [AOR=0.53; 95% CI: 0.29-0.97] lower odds of partially or fully vaccinated as  
 242 compared to children in the community with low maternal education (Table 2).

243 **Table 2: Multivariable multilevel ordinal logistic regression analysis of individual and**  
 244 **community-level determinants of child vaccination in Ethiopia, 2019**

|           | Null  | Model I      | Model II     | Model III    |
|-----------|-------|--------------|--------------|--------------|
| Variables | Model | AOR (95% CI) | AOR (95% CI) | AOR (95% CI) |

---

 Maternal educational level
 

---

|              |                     |                      |
|--------------|---------------------|----------------------|
| No education | 1                   | 1                    |
| Primary      | 1.97 (1.33, 2.93)** | 2.16 (1.43, 3.26)*** |
| Secondary    | 1.80 (0.97, 3.33)   | 2.02 (1.07, 3.79)*   |
| Higher       | 2.85 (1.35, 6.02)   | 2.67 (1.25, 5.71)*   |

---

 Maternal age
 

---

|       |                    |                    |
|-------|--------------------|--------------------|
| 15-24 | 1                  | 1                  |
| 25-34 | 1.13 (0.78, 1.63)  | 1.15 (0.79, 1.66)  |
| 35-49 | 1.81 (1.09, 3.02)* | 1.79 (1.08, 2.99)* |

---

 Religion
 

---

|            |                     |                   |
|------------|---------------------|-------------------|
| Orthodox   | 1                   | 1                 |
| Protestant | 0.46 (0.27, 0.77)** | 0.69 (0.36, 1.30) |
| Muslim     | 0.71 (0.47, 1.09)   | 1.28 (0.73, 2.24) |
| Other      | 0.39 (0.14, 1.22)   | 0.56 (0.18, 1.68) |

---

 Marital status
 

---

|              |                   |                    |
|--------------|-------------------|--------------------|
| Not in union | 1                 | 1                  |
| In union     | 1.84 (0.89, 3.80) | 2.21 (1.06, 4.58)* |

---

 Relationship to HH head
 

---

|                 |                   |                   |
|-----------------|-------------------|-------------------|
| Household head  | 1                 | 1                 |
| Wife or husband | 0.79 (0.50, 1.23) | 0.72 (0.46, 1.14) |
| Others          | 0.67 (0.36, 1.27) | 0.62 (0.33, 1.17) |

---

 Household wealth index
 

---

|      |   |   |
|------|---|---|
| Poor | 1 | 1 |
|------|---|---|

---

|    |                                 |                        |                       |
|----|---------------------------------|------------------------|-----------------------|
| 1  |                                 |                        |                       |
| 2  |                                 |                        |                       |
| 3  | Middle                          | 0.83 (0.51, 1.35)      | 0.77 (0.47, 1.29)     |
| 4  |                                 |                        |                       |
| 5  | Rich                            | 1.28 (0.83, 1.97)      | 1.05 (0.63, 1.74)     |
| 6  |                                 |                        |                       |
| 7  |                                 |                        |                       |
| 8  | Number of ANC visits            |                        |                       |
| 9  |                                 |                        |                       |
| 10 | None                            | 1                      | 1                     |
| 11 |                                 |                        |                       |
| 12 | 1-3                             | 0.97 (0.61, 1.53)      | 0.99 (0.63, 1.58)     |
| 13 |                                 |                        |                       |
| 14 | 4 and above                     | 1.40 (0.86, 2.29)      | 1.27 (0.77, 2.09)     |
| 15 |                                 |                        |                       |
| 16 |                                 |                        |                       |
| 17 | Place of delivery               |                        |                       |
| 18 |                                 |                        |                       |
| 19 | Home                            | 1                      | 1                     |
| 20 |                                 |                        |                       |
| 21 | Health facility                 | 1.22 (0.82, 1.83)      | 1.11 (0.74, 1.66)     |
| 22 |                                 |                        |                       |
| 23 |                                 |                        |                       |
| 24 | PNC utilized                    |                        |                       |
| 25 |                                 |                        |                       |
| 26 | No                              | 1                      | 1                     |
| 27 |                                 |                        |                       |
| 28 | Yes                             | 1.04 (0.67, 1.63)      | 1.05 (0.67, 1.65)     |
| 29 |                                 |                        |                       |
| 30 |                                 |                        |                       |
| 31 | Immunization document           |                        |                       |
| 32 |                                 |                        |                       |
| 33 | Available                       | 1                      | 1                     |
| 34 |                                 |                        |                       |
| 35 | Not available                   | 27.32 (16.44,45.41)*** | 26.18(15.75,43.53)*** |
| 36 |                                 |                        |                       |
| 37 |                                 |                        |                       |
| 38 | Preceding birth interval        |                        |                       |
| 39 |                                 |                        |                       |
| 40 | < 24 months                     | 1                      | 1                     |
| 41 |                                 |                        |                       |
| 42 | 24-48 months                    | 1.07 (0.69, 1.65)      | 1.04 (0.67, 1.62)     |
| 43 |                                 |                        |                       |
| 44 | 48 and above                    | 1.05 (0.67, 1.65)      | 1.06 (0.67, 1.67)     |
| 45 |                                 |                        |                       |
| 46 |                                 |                        |                       |
| 47 | Received Vitamin A <sub>1</sub> |                        |                       |
| 48 |                                 |                        |                       |
| 49 | No                              | 1                      | 1                     |
| 50 |                                 |                        |                       |
| 51 | Yes                             | 4.32 (3.04, 6.15)***   | 4.14 (2.9, 5.9)***    |
| 52 |                                 |                        |                       |
| 53 |                                 |                        |                       |
| 54 | Number of < 5 children          |                        |                       |
| 55 |                                 |                        |                       |
| 56 |                                 |                        |                       |
| 57 |                                 |                        |                       |
| 58 |                                 |                        |                       |
| 59 |                                 |                        |                       |
| 60 |                                 |                        |                       |

|    |                            |                      |                     |
|----|----------------------------|----------------------|---------------------|
| 1  |                            |                      |                     |
| 2  |                            |                      |                     |
| 3  |                            |                      |                     |
| 4  | ≤ 2 children               | 1                    | 1                   |
| 5  |                            |                      |                     |
| 6  | >2 children                | 0.62 (0.36, 1.07)    | 0.68 (0.39, 1.16)   |
| 7  |                            |                      |                     |
| 8  | Region                     |                      |                     |
| 9  |                            |                      |                     |
| 10 | Tigray                     | 1                    | 1                   |
| 11 |                            |                      |                     |
| 12 | Afar                       | 0.08 (0.03, 0.23)*** | 0.14 (0.04, 0.45)** |
| 13 |                            |                      |                     |
| 14 | Amhara                     | 0.59 (0.24, 1.48)    | 0.5 (0.22, 1.13)    |
| 15 |                            |                      |                     |
| 16 | Oromia                     | 0.21 (0.09, 0.48)*** | 0.45 (0.18, 1.09)   |
| 17 |                            |                      |                     |
| 18 | Somali                     | 0.08 (0.03, 0.22)*** | 0.19 (0.06, 0.60)** |
| 19 |                            |                      |                     |
| 20 | Benishangul                | 1.13 (0.37, 3.40)    | 0.74 (0.25, 2.22)   |
| 21 |                            |                      |                     |
| 22 | SNNPR                      | 0.19 (0.08, 0.45)*** | 0.48 (0.19, 1.17)   |
| 23 |                            |                      |                     |
| 24 | Gambella                   | 0.38 (0.12, 1.22)    | 0.22 (0.06, 0.77)*  |
| 25 |                            |                      |                     |
| 26 | Harari                     | 0.43 (0.12, 1.48)    | 0.14 (0.04, 0.52)** |
| 27 |                            |                      |                     |
| 28 | Addis Ababa                | 1.27 (0.39, 4.14)    | 1.14 (0.37, 3.47)   |
| 29 |                            |                      |                     |
| 30 | Dire Dawa                  | 0.78 (0.23, 2.62)    | 0.23 (0.06, 0.79)*  |
| 31 |                            |                      |                     |
| 32 |                            |                      |                     |
| 33 |                            |                      |                     |
| 34 |                            |                      |                     |
| 35 | Type of place of residence |                      |                     |
| 36 |                            |                      |                     |
| 37 | Urban                      | 1                    | 1                   |
| 38 |                            |                      |                     |
| 39 | Rural                      | 0.25 (0.14, 0.44)*** | 0.53 (0.30, 0.93)*  |
| 40 |                            |                      |                     |
| 41 |                            |                      |                     |
| 42 | Community women education  |                      |                     |
| 43 |                            |                      |                     |
| 44 | Low                        | 1                    | 1                   |
| 45 |                            |                      |                     |
| 46 | High                       | 1.04 (0.56, 1.94)    | 0.53 (0.29, 0.97)*  |
| 47 |                            |                      |                     |
| 48 |                            |                      |                     |
| 49 | Community poverty          |                      |                     |
| 50 |                            |                      |                     |
| 51 | Low                        | 1                    | 1                   |
| 52 |                            |                      |                     |
| 53 | High                       | 0.98 (0.55, 1.77)    | 1.11 (0.62, 2.00)   |
| 54 |                            |                      |                     |
| 55 |                            |                      |                     |
| 56 |                            |                      |                     |
| 57 |                            |                      |                     |
| 58 |                            |                      |                     |
| 59 |                            |                      |                     |
| 60 |                            |                      |                     |

## Community ANC utilization

Low

1

1

High

1.81 (0.83, 3.96)

0.87 (0.41, 1.83)

245 Key \* =  $p < 0.05$ , \* =  $p < 0.01$ , \* =  $p < 0.001$

246 **The random effect analysis result**

247 Table 3 presents the random effect analysis result of childhood vaccination status in Ethiopia. The  
 248 appropriateness of application of multilevel analysis and the presence of significant variations of  
 249 childhood vaccination status between clusters (the clustering effect) was justified by the ICC of  
 250 Null model (48.19%). The value of ICC decreased from 48.19% in the null model to 14.55% in  
 251 the final model showing the effect of clustering was more or less controlled. In addition, as  
 252 depicted in the table below the largest PCV of final model (81.70%) indicates the goodness of  
 253 model fitness. In another words, the final model (Model 3) has the highest capacity than model I  
 254 or model II alone to explain the variations in childhood vaccination status. On top of that, Model  
 255 III was the best explanatory model able to explain the variation in childhood vaccination status  
 256 between the clusters since the value of deviance observed in the final model was smallest than the  
 257 remaining models (Table 3).

258 **Table 3: Random effects analysis and model fit statistics of child vaccination in Ethiopia,**  
 259 **2019**

| Parameters                    | Null Model | Model I | Model II | Model III |
|-------------------------------|------------|---------|----------|-----------|
| Community level Variance (SE) | 3.06       | 0.76    | 1.21     | 0.56      |
| PCV (%)                       | Reference  | 75.16%  | 60.46%   | 81.70%    |
| ICC (%)                       | 48.19%     | 18.77%  | 26.89%   | 14.55%    |

|                |          |          |          |          |
|----------------|----------|----------|----------|----------|
| MOR            | 5.31     | 2.29     | 2.84     | 2.03     |
| Log-likelihood | -988.74  | -684.36  | -919.88  | -667.78  |
| Deviance       | 1,977.48 | 1,368.72 | 1,839.76 | 1,335.56 |
| AIC            | 1983.49  | 1418.72  | 1873.77  | 1413.56  |
| BIC            | 1998.24  | 1540.70  | 1957.34  | 1603.86  |

## 260 Discussion

261 From this analysis, complete immunization in Ethiopia was 39.08%. Compared to other studies in  
 262 the country, it is less than 76.8% in South East (21), 47% pooled prevalence(22), and 67% in 2016  
 263 from other study(29). It is also less than 59.40% summarized Sub-Saharan coverage(17), 69.21%  
 264 in East Africa(29), 45.2% in Mogadishu (18), and 69.3% in Togo in 2019(20). It is 38.3% from  
 265 2016 EDHS which is in the confidence interval. This indicates that the current prevalence of full  
 266 immunization unchanged over time. The reasons might be political instabilities in the country in  
 267 the last five years, while it might also be due to the increased inequalities health service access  
 268 regardless of increased population in these years because of less resource development. Un-  
 269 education (48.91%) of mothers is also decades old persistent problem; however, it was still  
 270 improved from 67% in 2015(26). It is also better than regional recent figure (Sub-Saharan  
 271 countries)(17). Although there are some improvements from previous, there is an ample of gaps  
 272 from expected standard which might indicate efforts short of effectiveness. Poverty, which is  
 273 another old problem, is also persisted as only 39.98% mothers were from high income families.  
 274 From other study, 36.6% mothers were from wealthy families(26). Despite the issue with full  
 275 vaccination, other socioeconomic factors showed some improvements over the last few years;  
 276 however, their effect might be insignificant to influence vaccination due to the unstable market  
 277 inflation that might be cancelling its development.



1  
2  
3 278 The evidence from the current study also showed, maternal education had positive association with  
4  
5 279 higher level complete immunization category which is also similar from other studies(17,24,26).  
6  
7  
8 280 The consistence might indicate that education is an independent predictor of complete  
9  
10 281 immunization which needs undivided attention. Education is evidenced by individually and  
11  
12 282 community level influences. Increased maternal age puts mothers in the higher level of full  
13  
14 283 immunization category. Other studies also showed higher age has association with full  
15  
16 284 immunization(3,17). This might indicate maturity is an important factor in caring for own child,  
17  
18 285 which might also indicate early marriage, child bearing at younger age, and age at first birth needs  
19  
20 286 adequate consideration in birth planning. Children whose mothers remained in union had higher  
21  
22 287 tendency to be in higher category of full immunization. From previous studies, there are consistent  
23  
24 288 findings(17,18). This might be an indication that disrupted family might be tight in self-survival  
25  
26 289 activities than looking after their children and so that staying in union should be encouraged.  
27  
28  
29 290 Mothers who keep evidence of vaccination tend to be in higher category of immunization  
30  
31 291 coverage. This is also true for some studies(18,19,26). This means, women who keeps children  
32  
33 292 evidence of vaccination might have indeed great regards for full immunization while carelessness  
34  
35 293 might start from poor evidence keeping. Children who received Vitamin A<sub>1</sub> had higher chance of  
36  
37 294 completing full vaccination. The fact that vitamin A supplied towards the end of most vaccine  
38  
39 295 might raise to this association (12). This might be another persist issue we never eased in previous  
40  
41 296 efforts as per evidence from this study and could be set as an objective to attain other sub-  
42  
43 297 objectives. Ethiopia further classified in city administrations, agrarian, and pastoralist regions.  
44  
45 298 Pastoralists regions like Afar and Somali in relation with agrarian but semi pastoralist regions like  
46  
47 299 Gambela, Benishangul Gumuz and Harari had higher tendency of failing to low category of full  
48  
49 300 immunization. All other country level data analysis indicated similar facts(26). This is also  
50  
51  
52  
53  
54  
55  
56  
57  
58  
59

1  
2  
3 301 confirmed by other studies that compared developed and underdeveloped regions(24,26). The  
4  
5 302 issue here is very apparent that attention deprived regions should be the next intervention areas.  
6  
7 303 This problem is relatively similar between the rural and urban place of residence. Other studies  
8  
9 304 also laud that inequalities between rural and urban residence need careful considerations(13). This  
10  
11 305 might be apparently due to access, awareness, and availability. This study provided fabulous  
12  
13 306 information for the scientific community; however, it should advisable to use it in recalling  
14  
15 307 secondary data, disproportional nature of the data, and cross sectional nature of the data. Authors  
16  
17 308 followed standards of data handling as per guidelines of DHS, weighted data, and performed  
18  
19 309 explicit analysis described under method section to relax possible limitations.  
20  
21  
22  
23

## 24 310 **Conclusion**

25  
26  
27 311 Although full immunization increased from EDHS 2000 to 2016, the current analysis of EMDHS  
28  
29 312 result showed it was indeed remained unchanged. The analysis identified many factors that might  
30  
31 313 be contributed for the no changed. Maternal educational level, maternal age, marital status,  
32  
33 314 presence of vaccination document, received Vitamin A<sub>1</sub>, region, place of residence, and  
34  
35 315 community women education were some of the contributors. Analyzing associated factors showed  
36  
37 316 some of the factors are old enough causing the problem for decades. Even though the political  
38  
39 317 situation in the country might also contributed to the persistency of these factors, it is advisable  
40  
41 318 that accessibility, awareness, available coupled with maternal education and poverty especially  
42  
43 319 family and maternal capacity remained critical and need all round efforts like further government  
44  
45 320 commitment, dedicated international supports, and peace and security can override the problem.  
46  
47  
48  
49  
50

51 321 **Abbreviation/Acronyms:** Demographic Health Survey (DHS); Ethiopian Demographic Health  
52  
53 322 Survey (EDHS); Ethiopian Mini-Demographic Health Survey( EMDHS); World Health  
54  
55 323 Organization (WHO); United Nations Children's Fund (UNICEF); Adjusted Odds Ratio (AOR);  
56  
57  
58  
59

1  
2  
3 324 Antenatal Care (ANC); Postnatal Care (PNC); Pneumococcal Conjugate Vaccine (PCV); and  
4  
5 325 Measles Containing Vaccine (MCV); Bacille Calmette-Guerin (BCG); South Nations  
6  
7 326 Nationalities and Peoples Region (SNNPR); Intra-class Correlation Coefficient (ICC); Median  
8  
9  
10 327 Odds Ratio (MOR), Confidence Interval (CI)  
11  
12

### 13 328 **Declarations**

#### 16 329 **Ethics approval and consent to participate**

18 330 This study used secondary data from demographic and health survey data files. Initially, the  
19  
20 331 MEASURE DHS team was formally requested to access the datasets by completing the online  
21  
22 332 request form on their website ([www.dhsprogram.com](http://www.dhsprogram.com)). Accordingly, permission to access the data  
23  
24 333 and the letter of authorization was obtained from ICF international. Therefore, for this study  
25  
26 334 consent to participate is not applicable. We kept all data confidential, and no effort was made to  
27  
28 335 identify households or individuals. The Ethiopian Health Nutrition and Research Institute  
29  
30 336 (EHNRI) Review Board and the National Research Ethics Review Committee (NRERC) at the  
31  
32 337 Ministry of Science and Technology of Ethiopia, approved EMDHS 2019. The authors also  
33  
34 338 confirm that all methods were carried out in accordance with relevant guidelines and regulations.  
35  
36  
37  
38

#### 39 339 **Consent for publication**

41 340 Not applicable  
42  
43

#### 44 341 **Availability of data and materials**

46 342 The survey dataset used in this analysis are third party data from the demographic and health  
47  
48 343 survey website ([www.dhsprogram.com](http://www.dhsprogram.com)) and permission to access the data is granted only for  
49  
50 344 registered DHS data user.  
51  
52  
53

#### 54 345 **Competing interests**

1  
2  
3 346 The authors have declared that no competing interest existed.  
4

5 347 **Funding**  
6

7  
8 348 The authors received no specific funding for this work.  
9

10 349 **Authors' contribution**  
11

12  
13 350 SS has obtained and analyzed the EMDHS data. SS, GG, SH were equally involved in the  
14  
15 351 conception of the study, interpreted the results, drafted and critically revised the manuscript. All  
16  
17 352 authors have read and approved the final version of the manuscript.  
18  
19

20 353 **Acknowledgments**  
21

22 354 The authors are grateful to Measure DHS, ICF International Rockville, Maryland, USA for  
23  
24  
25 355 allowing us to use the 2019 EMDHS data.  
26  
27  
28  
29  
30  
31  
32  
33  
34  
35  
36  
37  
38  
39  
40  
41  
42  
43  
44  
45  
46  
47  
48  
49  
50  
51  
52  
53  
54  
55  
56  
57  
58  
59  
60

1  
2  
3 357 **References**  
4  
5

- 6 358 1. WHO vaccine-preventable diseases : monitoring system . 2020 global summary.  
7  
8 359 2022;2020:2–3.  
9  
10  
11 360 2. Chepkurui V, Amponsah-dacosta E, Haddison EC. Characterization of National  
12  
13 361 Immunization Programs in the Context of Public Health Emergencies : A Case Study of  
14  
15 362 13 Countries in the WHO Africa Region. *Front public Heal*. 2021;9(September):1–12.  
16  
17  
18  
19 363 3. South Africa : WHO and UNICEF estimates of immunization coverage : 2016 revision  
20  
21 364 South Africa : WHO and UNICEF estimates of immunization coverage : 2016 revision.  
22  
23 365 2018;1–18.  
24  
25  
26 366 4. WHO. Immunization coverage. 2022;(July 2021):3–7.  
27  
28  
29 367 5. Patel MK, Goodson JL, Alexander JP Jr., et al. Progress Toward Regional Measles  
30  
31 368 Elimination — Worldwide, 2000–2019. *MMWR Morb Mortal Wkly Rep* 2020;69:1700–  
32  
33 369 1705. Poliomyelitis. World Health Organization; 2019.  
34  
35  
36  
37 370 6. World Health Organization [WHO]. Counting the impact of vaccines. 2021;(April):2017–  
38  
39 371 9. Available from: [https://www.who.int/news-room/feature-stories/detail/counting-the-](https://www.who.int/news-room/feature-stories/detail/counting-the-impact-of-vaccines)  
40  
41 372 [impact-of-vaccines](https://www.who.int/news-room/feature-stories/detail/counting-the-impact-of-vaccines)  
42  
43  
44  
45 373 7. Ghendon Y. Vaccine preventable viral diseases in developing countries. *World J*  
46  
47 374 *Microbiol Biotechnol*. 1991 Mar;7(2):115-20. doi: 10.1007/BF00328980. PMID:  
48  
49 375 24424922.  
50  
51  
52 376 8. Brenzel L, Wolfson LJ, Fox-Rushby J, et al. Vaccine-preventable Diseases. In: Jamison  
53  
54 377 DT, Breman JG, Measham AR, et al., editors. *Disease Control Priorities in Developing*  
55  
56  
57  
58  
59  
60

- 1  
2  
3 378 Countries. 2nd edition. Washington (DC): The International Bank for Reconstruction a.  
4  
5  
6 379 9. Rodrigues CMC, Plotkin SA. Impact of Vaccines; Health, Economic and Social  
7  
8 380 Perspectives. *Front Microbiol.* 2020;11(July).
- 10  
11 381 10. WHO. Organisation Mondiale Vaccine-Preventable Diseases And Immunization. 2021;71.  
12  
13  
14 382 11. Raslan R, El Sayegh S, Chams S, Chams N, Leone A, Hajj Hussein I. Re-Emerging  
15  
16 383 Vaccine-Preventable Diseases in War-Affected Peoples of the Eastern Mediterranean  
17  
18 384 Region—An Update. *Front Public Heal.* 2017;5(October):1–8.
- 20  
21  
22 385 12. WHO. Global Immunization News (GIN). 2017;(January).  
23  
24  
25 386 13. Shibre G, Zegeye B, Idriss-wheeler D, Yaya S. Inequalities in measles immunization  
26  
27 387 coverage in Ethiopia : a cross-sectional analysis of demographic and health surveys 2000  
28  
29 388 – 2016. *BMC Infect Dis.* 2020;20:1–12.
- 31  
32 389 14. Greenwood B. 2014 The contribution of vaccination to global health: past, present and  
33  
34 390 future. *Phil. Trans. R. Soc. B.* 2014; 369: 20130433.  
35  
36 391 <http://dx.doi.org/10.1098/rstb.2013.0433>.
- 38  
39  
40 392 15. Ethiopia : WHO and UNICEF estimates of immunization coverage : 2019 revision  
41  
42 393 Ethiopia : WHO and UNICEF estimates of immunization coverage : 2019 revision.  
43  
44 394 2021;1–28.
- 46  
47 395 16. Figueiredo A De, Were F. Local trends in immunisation coverage across Africa. *Lancet*  
48  
49 [Internet]. 2019;393(10183):1779–81. Available from: <http://dx.doi.org/10.1016/S0140->  
50 396 [6736\(19\)30702-0](http://dx.doi.org/10.1016/S0140-6736(19)30702-0)  
51  
52 397
- 54  
55 398 17. Fenta SM, Biresaw HB, Fentaw KD. Determinants of full childhood immunization among  
56  
57  
58  
59  
60

- 1  
2  
3 399 children aged 12 – 23 months in sub-Saharan Africa : a multilevel analysis using  
4  
5 400 Demographic and Health Survey Data. *Trop Med Health*. 2021;49:29.  
6  
7  
8 401 18. Mohamud MHT, Magan MA, Mohamed LM, Mohamud MA, Muse AA. Barriers for full  
9  
10 402 immunization coverage among under 5 years children in Mogadishu , Somalia. *J Fam*  
11  
12 403 *Med Prim Care*. 2020;9(6):2664–9.  
13  
14  
15  
16 404 19. Yadita ZS, Ayehubizu LM (2021) Full immunization coverage and associated factors  
17  
18 405 among children aged 12–23 months in Somali Region, Eastern Ethiopia. *PLoS ONE*.2021  
19  
20 406 16(12): e0260258. <https://doi.org/10.1371/journal.pone.0260258>. Available from:  
21  
22 407 <http://dx.doi.org/10.1371/journal.pone.0260258>  
23  
24  
25  
26 408 20. Zida-Compaore WIC, Ekouevi DK, Gbeasor-Komlanvi FA, Sewu EK, Blatome T,  
27  
28 409 Gbadoe AD, et al. Immunization coverage and factors associated with incomplete  
29  
30 410 vaccination in children aged 12 to 59 months in health structures in Lomé. *BMC Res*  
31  
32 411 *Notes* [Internet]. 2019;12(1):1–7. Available from: [https://doi.org/10.1186/s13104-019-](https://doi.org/10.1186/s13104-019-4115-5)  
33  
34 412 4115-5  
35  
36  
37  
38 413 21. Legesse E, Dechasa W. An assessment of child immunization coverage and its  
39  
40 414 determinants in Sinana District , Southeast. *BMC Pediatr* [Internet]. 2015;15:1–14.  
41  
42  
43 415 22. Nour TY, Farah AM, Ali OM, Abate KH. Immunization coverage in Ethiopia among 12 –  
44  
45 416 23 month old children : systematic review and meta-analysis. *BMC Public Health*  
46  
47 417 [Internet]. 2020;20:1–12. Available from: <https://doi.org/10.1186/s12889-020-09118-1>  
48  
49  
50  
51 418 23. Tamirat KS, Sisay MM. Full immunization coverage and its associated factors among  
52  
53 419 children aged 12 – 23 months in Ethiopia : further analysis from the 2016 Ethiopia  
54  
55 420 demographic and health survey. *BMC Public Health*. 2019;19:1–7.  
56  
57  
58  
59  
60

- 1  
2  
3 421 24. Wondimu A, Cao Q, Asuman D, Almansa J, Postma MJ. Understanding the Improvement  
4  
5 422 in Full Childhood Vaccination Coverage in Ethiopia Using Oaxaca – Blinder  
6  
7 423 Decomposition Analysis. *vaccines*. 2020;8:1–11.
- 8  
9  
10 424 25. Bangura JB, Xiao S, Qiu D, Ouyang F, Chen L. Barriers to childhood immunization in  
11  
12 425 sub- Saharan Africa : A systematic review. 2020;20:1108.
- 13  
14  
15 426 26. Lakew Y, Bekele A, Biadgilign S. Factors influencing full immunization coverage among  
16  
17 427 12 – 23 months of age children in Ethiopia : evidence from the national demographic and  
18  
19 428 health survey in 2011. *BMC Public Health*. 2015;15:1–8.
- 20  
21  
22 429 27. Girmay A, Dadi AF. Full Immunization Coverage and Associated Factors among Children  
23  
24 430 Aged 12-23 Months in a Hard-to-Reach Areas of Ethiopia. *hindawi*. 2019;2019:8.
- 25  
26  
27 431 28. Ethiopian Public Health Institute (EPHI) and ICF. 2019. Mini Demographic and Health  
28  
29 432 Survey 2019: key Indicators. Rockville, Maryland, USA: EPHI and ICF. 2019. 35 p.
- 30  
31  
32 433 29. Gelaye SS, Yenit MK, Baraki AG. Rural Vaccination Coverage Among Children Aged  
33  
34 434 12–23 Months Was Higher Than the Urban Counterparts: A Comparative Cross-Sectional  
35  
36 435 Study in Pawi District, Ethiopia. *Pediatr Heal Med Ther*. 2021;Volume 12:119–27.
- 37  
38  
39  
40  
41  
42 436  
43  
44  
45 437  
46  
47  
48 438  
49  
50  
51 439  
52  
53  
54 440



1  
2  
3  
4  
5  
6  
7  
8  
9  
10  
11  
12  
13  
14  
15  
16  
17  
18  
19  
20  
21  
22  
23  
24  
25  
26  
27  
28  
29  
30  
31  
32  
33  
34  
35  
36  
37  
38  
39  
40  
41  
42  
43  
44  
45  
46  
47  
48  
49  
50  
51  
52  
53  
54  
55  
56  
57  
58  
59  
60

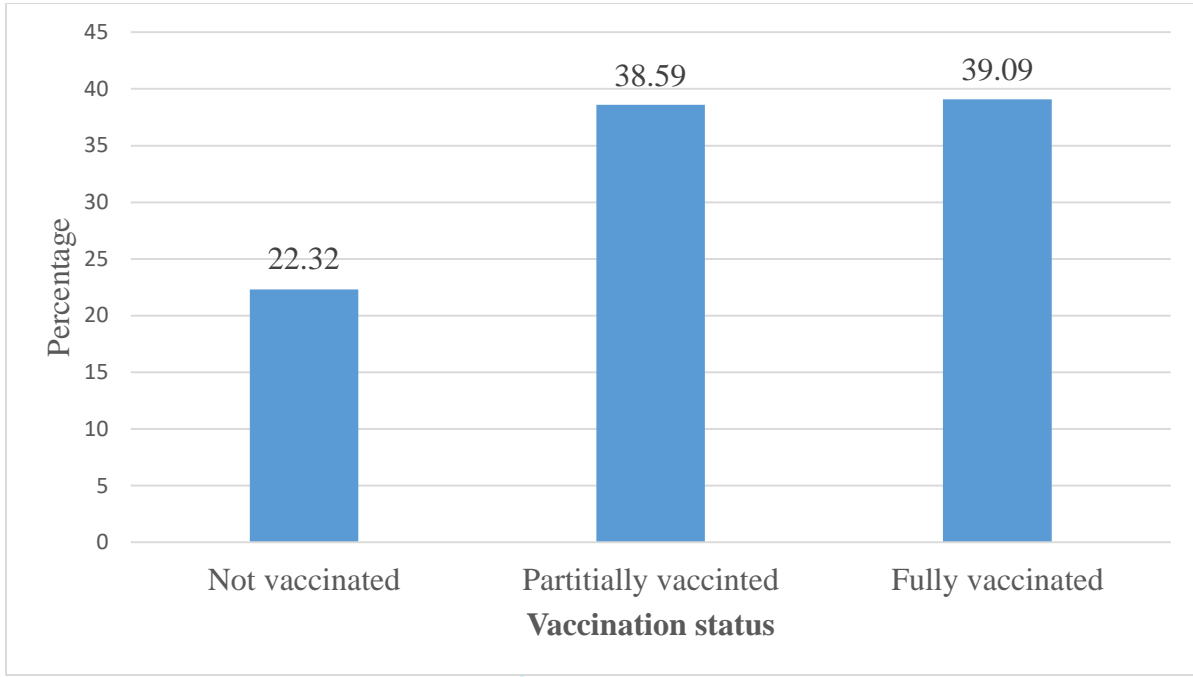

**Fig. 1: Vaccination status of children aged 12-23 months in Ethiopia, 2019**

review only

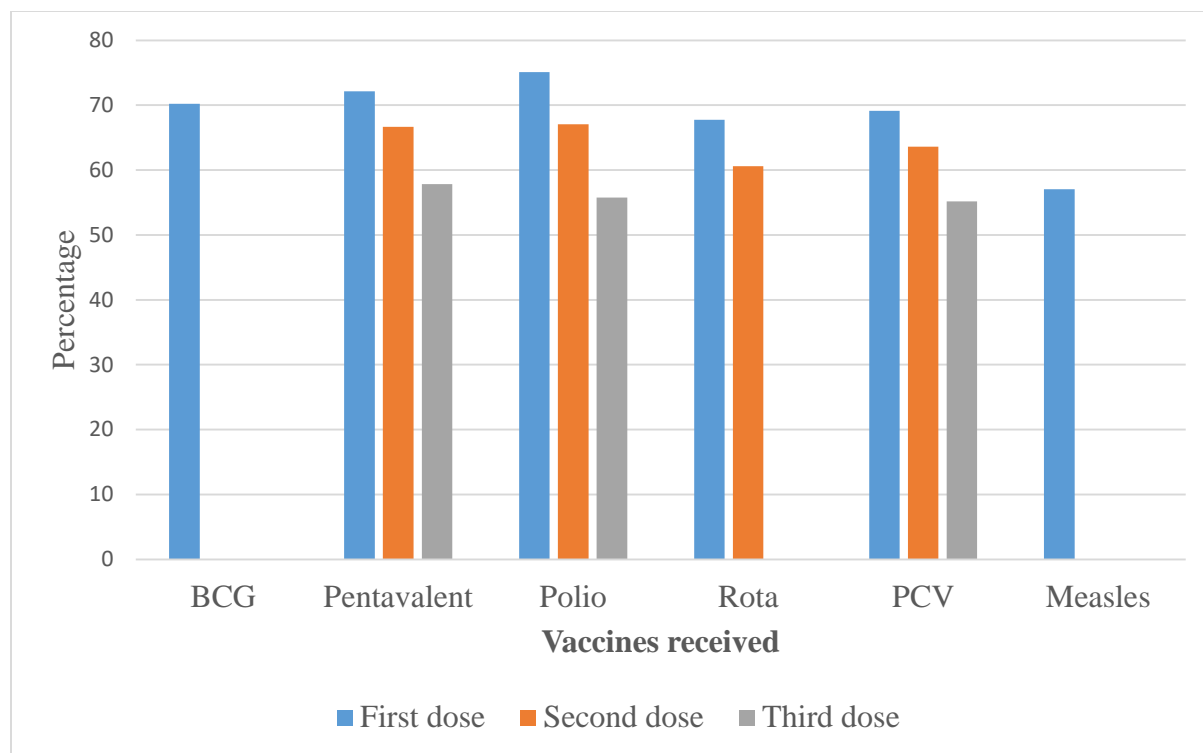

**Fig. 2: Percentage of children aged 12-23 months who received a particular vaccine in Ethiopia, 2019**

# BMJ Open

## Determinants of childhood vaccination among children aged 12–23 months in Ethiopia: A community-based cross-sectional study

|                                 |                                                                                                                                                                                                                                                                                                                                                                                                                                                                                                           |
|---------------------------------|-----------------------------------------------------------------------------------------------------------------------------------------------------------------------------------------------------------------------------------------------------------------------------------------------------------------------------------------------------------------------------------------------------------------------------------------------------------------------------------------------------------|
| Journal:                        | <i>BMJ Open</i>                                                                                                                                                                                                                                                                                                                                                                                                                                                                                           |
| Manuscript ID                   | bmjopen-2022-069278.R1                                                                                                                                                                                                                                                                                                                                                                                                                                                                                    |
| Article Type:                   | Original research                                                                                                                                                                                                                                                                                                                                                                                                                                                                                         |
| Date Submitted by the Author:   | 23-Jan-2023                                                                                                                                                                                                                                                                                                                                                                                                                                                                                               |
| Complete List of Authors:       | Sako, Sewunet; Arba Minch University, College of Medicine and Health Sciences, School of Public Health, Department of Health Informatics, Arba Minch, Ethiopia<br>Gilano, Girma; Arba Minch University, College of Medicine and Health Sciences, School of Public Health, Department of Health Informatics, Arba Minch, Ethiopia<br>Samuel, Hailegebreal; Arba Minch University, College of Medicine and Health Sciences, School of Public Health, Department of Health Informatics, Arba Minch, Ethiopia |
| <b>Primary Subject Heading</b>: | Public health                                                                                                                                                                                                                                                                                                                                                                                                                                                                                             |
| Secondary Subject Heading:      | Health services research                                                                                                                                                                                                                                                                                                                                                                                                                                                                                  |
| Keywords:                       | Community child health < PAEDIATRICS, PREVENTIVE MEDICINE, PUBLIC HEALTH                                                                                                                                                                                                                                                                                                                                                                                                                                  |
|                                 |                                                                                                                                                                                                                                                                                                                                                                                                                                                                                                           |

SCHOLARONE™  
Manuscripts

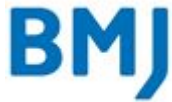

I, the Submitting Author has the right to grant and does grant on behalf of all authors of the Work (as defined in the below author licence), an exclusive licence and/or a non-exclusive licence for contributions from authors who are: i) UK Crown employees; ii) where BMJ has agreed a CC-BY licence shall apply, and/or iii) in accordance with the terms applicable for US Federal Government officers or employees acting as part of their official duties; on a worldwide, perpetual, irrevocable, royalty-free basis to BMJ Publishing Group Ltd ("BMJ") its licensees and where the relevant Journal is co-owned by BMJ to the co-owners of the Journal, to publish the Work in this journal and any other BMJ products and to exploit all rights, as set out in our [licence](#).

The Submitting Author accepts and understands that any supply made under these terms is made by BMJ to the Submitting Author unless you are acting as an employee on behalf of your employer or a postgraduate student of an affiliated institution which is paying any applicable article publishing charge ("APC") for Open Access articles. Where the Submitting Author wishes to make the Work available on an Open Access basis (and intends to pay the relevant APC), the terms of reuse of such Open Access shall be governed by a Creative Commons licence – details of these licences and which [Creative Commons](#) licence will apply to this Work are set out in our licence referred to above.

Other than as permitted in any relevant BMJ Author's Self Archiving Policies, I confirm this Work has not been accepted for publication elsewhere, is not being considered for publication elsewhere and does not duplicate material already published. I confirm all authors consent to publication of this Work and authorise the granting of this licence.

1  
2  
3 **1 Determinants of childhood vaccination among children aged 12–23 months in Ethiopia: A**  
4  
5 **2 community-based cross-sectional study**  
6  
7

8  
9  
3

10  
11  
12 4 Sewunet Sako<sup>1\*</sup>, Girma Gilano<sup>1</sup> and Samuel Hailegebreal<sup>1</sup>  
13

14  
15  
5

16  
17 6 1. Department of Health Informatics, School of Public Health, College of Medicine and Health  
18  
19 Sciences, Arba Minch University, Arba Minch, Ethiopia  
20  
21

22  
23  
8

24  
25  
26 9 \* [zesew1lalem@gmail.com](mailto:zesew1lalem@gmail.com) – (SS)  
27

28  
29  
10

30  
31  
32 11 P.O. Box 21  
33

34  
35  
36 12 Word count: 4276  
37  
38  
39  
40  
41  
42  
43  
44  
45  
46  
47  
48  
49  
50  
51  
52  
53  
54  
55  
56  
57  
58  
59  
60

## 13 Abstract

14 **Objective:** Childhood vaccination is a cost-effective essential service to reach larger population  
15 globally. Due to unclear reasons, new emergence and resurgence of vaccine preventable diseases  
16 gets increase. Thus, the aim of this study is to identify prevalence and determinants of childhood  
17 vaccination in Ethiopia.

18 **Design:** Community based cross-sectional study

19 **Setting:** We used data from 2019 Ethiopia Mini Demographic and Health Survey (EMDHS). The  
20 survey included all the nine regional states and two city administrations of Ethiopia.

21 **Participants:** A weighted sample of 1,008 children 12-23 months of age was included in the  
22 analysis.

23 **Main outcome measures:** Multilevel proportional odds model was fitted to identify determinants  
24 of childhood vaccination status. In the final model, variables with p-value of less than 5% and an  
25 adjusted odds ratio with a 95% CI reported.

26 **Result:** The full childhood vaccination coverage of Ethiopia was 39.09% (95% CI: 36.06%,  
27 42.28). Mothers attended primary [AOR=2.16; 95% CI: 1.43-3.26], secondary [AOR=2.02; 95%  
28 CI: 1.07-3.79], and higher schools [AOR=2.67; 95% CI: 1.25-5.71], being in union [AOR=2.21;  
29 95% CI: 1.06-4.58], kept vaccination cards [AOR=26.18; 95% CI: 15.75-43.53], children received  
30 Vitamin A<sub>1</sub> [AOR=4.14; 95% CI: 2.9-5.9], living in Afar [AOR=0.14; 95% CI: 0.04-0.45], Somali  
31 [AOR=0.19; 95% CI: 0.06-0.60], Gambela [AOR=0.22; 95% CI: 0.06-0.77], Harari [AOR=0.14;  
32 95% CI: 0.04-0.52], Dire Dawa [AOR=0.23; 95% CI: 0.06-0.79] regions, and rural residents  
33 [AOR=0.53; 95% CI: 0.30-0.93] were factors significantly associated with childhood vaccination.

1  
2  
3 34 **Conclusion:** The coverage of full childhood vaccination in Ethiopia was low remained unchanged  
4  
5 35 since 2016. The study identified both the individual- and community-level factors affected the  
6  
7 36 vaccination status. Accordingly, public health intervention targeted to these identified factors can  
8  
9 37 increase childhood full vaccination status.  
10  
11  
12

13 38 **Keywords:** full vaccination; multilevel; ordinal, 12-23 months' children; Ethiopia  
14  
15

### 16 39 **Strengths and limitations of this study**

17  
18

- 19 40 • This study used most recent nationwide secondary data that shows proportion of EPI  
20  
21 41 coverage among children aged 12–23 months in Ethiopia.
- 22  
23 42 • Data of 1,008 children was extracted from the 2019 Ethiopia mini demographic and health  
24  
25 43 survey (EMDHS) dataset for this analysis.
- 26  
27 44 • We used multilevel proportional odds model to overcome the hierarchical nature of  
28  
29 45 EMDHS data and to identify both individual and community-level factors of EPI.
- 30  
31 46 • Establishing temporal relationship of causation between childhood vaccination and its  
32  
33 47 determinants was impossible due to the nature of the study design used for the survey.
- 34  
35 48 • Recall bias is the most relevant limitation of the study.  
36  
37  
38  
39  
40  
41  
42  
43  
44  
45  
46  
47  
48  
49  
50  
51  
52  
53  
54  
55  
56  
57  
58  
59  
60

## 51 Introduction

52 According to the United Nations Children Fund (UNICEF), immunizations is a dynamic  
53 constituent of frontline health care to access larger populations. Compared to any other health or  
54 social activities, immunization reduces global annual death by significant proportion(1–4). It saves  
55 lives and protects people’s health, improves countries’ productivity and resilience, and helps to  
56 ensure a safer and healthier world(5,6).

57 According to the Ethiopian Ministry of Health, a child takes OPV<sub>0</sub> and BCG at Birth. At six weeks  
58 after birth, a child takes OPV1(oral polio vaccine), Pentavalent1(DPT+HepB+Hib),  
59 Pneumococcal1, and Rotavirus1. Then 10 weeks after birth the child takes OPV2, and  
60 Pentavalent2, Pneumococcal2, and Rota2. The child takes OPV3, Pentavalent3, Pneumococcal3,  
61 Inactivated polio vaccine (IPV) at 14<sup>th</sup> weeks. Other vaccines such as Measles Containing Vaccine  
62 (MCV1) at 9<sup>th</sup> month and MCV2 at 15<sup>th</sup> month and human papilloma virus (HPV) at 14<sup>th</sup> years for  
63 girls are given. However, this study only considers vaccines between 1 to 2 years. All vaccines are  
64 equally important(7). Currently, Ethiopia do not provide Rubella, Mumps and chickenpox  
65 vaccines to immunize children. Depending on the amount of immunity or protection after receiving  
66 a dose, a child may require more than one dose for some vaccine(8). Additionally, more than one  
67 dose is needed to build high enough immunity to prevent disease and boost immunity that fades  
68 over time(9). For vaccines that do not initiate full protection at first introduction, additional dose  
69 of vaccine usually repeated(10). However, this does not mean one vaccine is better than the other  
70 is or more important than another since it depends on the nature of the disease.

71 Globally, about 6.6 million children die every year and half of the deaths would have been  
72 prevented by vaccination(11). The global inequality in health care distribution force many low and  
73 middle income countries to live under the bundle of pestilent cumulative old health problems(12).



1  
2  
3 74 Africa is among the regions severely affected by globally imbalanced immunization resources  
4  
5 75 distribution. Vaccine preventable diseases become the big burden in war affected parts of the world  
6  
7 76 and underdeveloped countries like Ethiopia(13). Despite the existence of highly cost-effective  
8  
9 77 vaccines on global markets, situations such as war, displacements, under vaccination, and poor  
10  
11 78 access to vaccine contributes to the prevalence of vaccine preventable disease(14). The proportion  
12  
13 79 of the full immunization reflects how resources distribution caused the imbalance in childhood  
14  
15 80 vaccination(1,15).

16  
17  
18  
19  
20 81 Regardless of advancement and attainments of immunization, newly emerging vaccine preventable  
21  
22 82 diseases become still common in Africa(16). There are people who deprived of accessing  
23  
24 83 immunization in some countries and becoming the reason for the prevalence of vaccine  
25  
26 84 preventable diseases as admitted by World Health Organization (WHO) and other studies(17–19).  
27  
28 85 In Ethiopia a study has described that educated (30%) and rich (31%) people better vaccinate their  
29  
30 86 children(20).

31  
32  
33  
34 87 Some evidences indicated that global vaccine coverage is decreasing(21). A study summarized the  
35  
36 88 Demographic Health Surveys (DHS) of Sub-Saharan African countries showed that the full  
37  
38 89 vaccination coverage was 59.40% in 2021(22). In Mogadishu, full immunization was 45.2% and  
39  
40 90 41.4% in 2020 and 2021 respectively(22–24). In Togo, the full immunization coverage was 69.3%  
41  
42 91 in Lome district in 2019(25). In Ethiopia. the full immunization coverage is 76.81% in the  
43  
44 92 Southeast region(26); however, the pooled prevalence amongst 12–23 month old children in  
45  
46 93 Ethiopia is 47%(27). EMDHS 2019 demonstrated that coverage of full vaccination was 44(28)%.  
47  
48 94 The magnitude of full vaccination was increased from 14.3% in 2000 to 44% in 2019(29). From  
49  
50 95 this, we understand that the coverage of full vaccination is not adequate.  
51  
52  
53  
54  
55  
56  
57  
58  
59  
60

1  
2  
3 96 Many factors that support the argument of resource disparities as a reason for low coverage in  
4  
5 97 some countries. A systematic review conducted in Sub-Saharan African countries showed that lack  
6  
7 98 of knowledge of immunization knowledge, distance to access point, financial deprivation, lack of  
8  
9  
10 99 partners support, and distrust in vaccines and immunization programs were the barrier(30). The  
11  
12 100 absence of immunization card, respondents' sex, level of education, marital status, and  
13  
14 101 organization of health system are mentioned in another study(25). A study included many sub  
15  
16 102 Saharan African countries showed that maternal education, health facility delivery, fathers  
17  
18 103 secondary education and above, ANC visits, PNC visit, wealth index, media exposure, and  
19  
20 104 distance to health facility affected the vaccination coverage(22). In Ethiopia, from previous four  
21  
22 105 EDHS, postnatal check-up, maternal awareness, regional difference (economic, education and life  
23  
24 106 style), educational status, residence, and women wealth index have been influenced  
25  
26 107 vaccination(20,27,31). From another study antenatal care visit, higher level of maternal education,  
27  
28 108 good knowledge of immunization, short distance to health facility, and institutional delivery were  
29  
30  
31 109 the determinants of childhood immunization(32).

32  
33  
34  
35  
36 110 Different small scale and large scale (national level) studies have been done to identify the  
37  
38 111 determinants of childhood vaccination in the country. However, majority of the studies conducted  
39  
40 112 did not examined natural ordering of child's vaccination status as fully, partially, or not vaccinated  
41  
42 113 at all. Hence, we used multilevel proportional odds model which overcomes the hierarchal nature  
43  
44 114 of the DHS data and considers natural ordering of the outcome variable. In addition, the coverage  
45  
46 115 of full vaccination still remains far behind the national health sector transformation plan II of  
47  
48 116 Ethiopia (75% by 2024/25)(33), showing the need for further study. Therefore, this study aimed  
49  
50 117 determining prevalence of childhood vaccination coverage and its determinants to assist in policy  
51  
52 118 improvements.

## 119 **Methods**

### 120 **Study design**

121 This study used the 2019 cross-sectional data of Ethiopian mini demographic and health survey  
122 (EMDHS). We obtained the dataset from demographic and health survey website  
123 (<http://dhsprogram.com/data/>) after getting permission to access. The mini survey was conducted  
124 in March 2019 to June 2019 for the second time in Ethiopia. The Ethiopian Public Health Institute  
125 (EPHI) in collaboration with Central Statistical Agency (CSA) and Federal Ministry of Health  
126 (FMOH) implemented a nationally representative household survey.

### 127 **Study setting**

128 The EMDHS survey included all the nine regions and two city administrations of the country.  
129 Ethiopia is the second most populous country from Africa and located in the horn of Africa.

### 130 **Participants**

131 The 2019 EMDHS used the sampling frame created for the upcoming Ethiopia population and  
132 housing census list of 149,093 enumeration areas (EA). Participants of the study were selected  
133 through a stratified two-stage cluster sampling technique. Initially, they stratified each region in  
134 the country into urban and rural areas. Probability proportional to EA size was used to select 305  
135 EAs (93 in urban and 212 in rural areas). In the second stage, lists of households were used as a  
136 sampling frame to select 30 households per cluster by equal probability systematic selection  
137 technique. Eligible participants for the interview were all women aged 15-49 years and who were  
138 the residents of the selected households. Accordingly, 8,885 women were interviewed out of 9,012  
139 eligible women, giving a response rate of 98.6%. All living children age 12–23 months at the time

1  
2  
3 140 of the survey were the source population of the study. The details of the survey methods and  
4  
5 141 procedures are available in the 2019 EMDHS report (29).  
6  
7

### 8 142 **Eligibility criteria**

9  
10 143 All children born in the 2 years preceding the survey were included in the analysis. However,  
11  
12 144 children who were not alive at the time of the survey were excluded from this study. Accordingly,  
13  
14 145 data of 1,008 children who had born in the last 2 years and surviving were extracted from the 2019  
15  
16 146 EMDHS datasets for this analysis (Fig. 1).  
17  
18

### 19 147 **Measurements of variables of the Study**

#### 20 148 **Dependent variable**

21  
22  
23 149 Child vaccination status was the outcome variable of the study. We categorized the outcome  
24  
25 150 variable as not vaccinated, partially vaccinated and fully vaccinated.  
26  
27

28  
29  
30 151 **Fully vaccinated:** is a child that has received one dose of Bacille Calmette-Guerin (BCG), three  
31  
32 152 doses of pentavalent, three doses of polio, two doses of Rota, three doses of pneumococcal  
33  
34 153 conjugate vaccine (PCV), and one dose of measles (MCV1).  
35  
36

37  
38 154 **Partially vaccinated:** is a child who had missed at least one or more of the thirteen vaccines/doses.  
39

40  
41 155 **Not vaccinated:** is a child that has not received any vaccine at all.  
42

43 156 The interviewers of the 2019 EMDHS obtained information on vaccination coverage from written  
44  
45 157 vaccination cards (infant immunization card and other health cards), from mothers' verbal reports,  
46  
47 158 and from health facility records. They request mothers who born child in the three preceding years  
48  
49 159 of the survey to show the infant immunization card or health card. Subsequently, they copy the  
50  
51 160 dates of each vaccination given in the corresponding questionnaire. Similarly, they ask mother  
52  
53  
54 161 who did not kept the cards to recall whether the child received that specific vaccination and the  
55  
56  
57  
58  
59  
60

1  
2  
3 162 number of doses that the child received. In addition, to complement these data (information  
4  
5 163 collected based on the mother's recall) the field supervisor collects complementary vaccination  
6  
7 164 records from health facility for a child who visited a health facility and missed vaccination data.  
8  
9  
10 165 Finally, a Health Facility Questionnaire was used to record vaccination information for all children  
11  
12 166 without a vaccination card seen during the mother's interview; however, we dropped records with  
13  
14  
15 167 the missing data.

### 168 **Independent variables**

169 In this study, we considered both individual and community-level variables. The individual-level  
170 variables included are maternal age, maternal educational level, religion, marital status,  
171 relationship to household head, sex of the household head, wealth index, number of antenatal care  
172 (ANC) visits, place of delivery, utilized postnatal care, presence of vaccination document, birth  
173 order number, preceding birth interval, sex of child, vitamin A1, total children ever born, and  
174 number of under five children in household. Region, type of place of residence, community women  
175 education, community poverty, and community ANC utilization are community-level factors of  
176 the study. Region is a grouping of the first administrative level of Ethiopia. During the survey  
177 period, there were 9 regions and 2 city administrations in the country namely, Tigray, Amhara,  
178 Afar, Oromia, Somali, Benishangul-Gumuz, South nations nationalities and people's region  
179 (SNNPR), Gambela, Harari, and two city administrations (Addis Ababa and Dire Dawa).  
180 Moreover, community women education, community poverty and community ANC utilization  
181 were community-level variables derived by aggregating individual-level factors. They were  
182 categorized as "low" or "high" based on the median value since the EMDHS were not normally  
183 distributed.

1  
2  
3 184 Information regarding the wealth index is derived from data collected in the Household  
4  
5 185 Questionnaire. The questionnaire includes queries concerning the household's ownership of  
6  
7  
8 186 several consumer items such as television and car; dwelling characteristics such as flooring  
9  
10 187 material; type of drinking water source; toilet facilities; and other characteristics related to wealth  
11  
12 188 status. Each household asset for which information is collected is assigned a weight or factor score  
13  
14 189 generated through principal components analysis (PCA). The resulting asset scores are  
15  
16 190 standardized about a standard normal distribution with a mean of zero and a standard deviation of  
17  
18 191 one. These standardized scores then used to create the breakpoints that define wealth quintiles as  
19  
20 192 Lowest, Second, Middle, Fourth, and Highest(34). Here, we further categorized the wealth index  
21  
22 193 into poor (lowest plus poor), average (middle), and rich (rich plus highest).  
23  
24  
25  
26

#### 27 194 **Data processing and statistical analysis**

28  
29 195 The data were cleaned, re-coded and analyzed using STATA/SE version 14.0. We used numbers,  
30  
31 196 mean, percentage or proportions to describe both the individual- and community-level variables.  
32  
33 197 We used sample weight to manage sampling errors and non-responses. The hierarchical nature of  
34  
35 198 the DHS data (DHS sampling methods) violates the assumption of independence or lack of  
36  
37 199 correlation of the residuals. In the DHS survey, observations are interdependent as participants  
38  
39 200 nested in the same cluster may behave in the same way and differ to other clusters in terms of the  
40  
41 201 outcome of interest. consequently, we used a two-level multilevel proportional odds model, as  
42  
43 202 single-level traditional statistical model might not be adequate to control for the clustering effect.  
44  
45 203 Moreover, we used multilevel proportional odds model to consider the natural ordering of the  
46  
47 204 response variable (not vaccinated, partially vaccinated and fully vaccinated). Accordingly, we built  
48  
49 205 four consecutive models to identify determinants of child vaccination in Ethiopia. We first fitted  
50  
51 206 the null model or the intercept only model. Then, model 1 was fitted with the individual-level  
52  
53  
54  
55  
56  
57  
58  
59  
60

1  
2  
3 207 variables. Similarly, we fitted model 2 (with community-level factors). Finally, model 3 or the  
4  
5 208 mixed-effects model was fitted with both individual- and community-level factors. The intra-class  
6  
7 209 correlation coefficient (ICC) was used to determine the clustering effect or community variation  
8  
9 210 and it was calculated using the following formula.

11  
12  
13 211 
$$\text{ICC} = \frac{V_A}{V_A + \frac{\pi^2}{3}}$$

14  
15  
16  
17 212 Where:  $V_A$  is community level variance and  $\frac{\pi^2}{3} = 3.29$  is individual level variance. On the other  
18  
19 213 hand, we checked Proportional Change in Variance (PCV), Median Odds Ratio (MOR), and  
20  
21 214 Deviance by using the following formulas to determine the fitness of the model.  $\text{PCV} = \frac{V_0 - V_i}{V_0}$ .

22  
23 215 Where:  $V_0$  is a variance in the null model and  $V_i$  is a variance in the consecutive models.  $\text{MOR} =$   
24  
25 216  $e^{0.95V_i}$  where:  $V_i$  indicates that cluster variance. The last model showed the lowest deviance  
26  
27 217 (Model III) and become the best-fitted model. Furthermore, we examined the proportional odds  
28  
29 218 assumption that assume the equal effect of each factor across the outcome categories by score test.  
30  
31 219 We checked Variance Inflation Factor (VIF) and found 1.60 to assess the presence of  
32  
33 220 multicollinearity. The finding is in the acceptable range. In bi-variable analysis, we kept variables  
34  
35 221 with p-value less than 0.25 for the multivariable multilevel proportional odds analysis. Finally, in  
36  
37 222 the multivariable analysis, we reported variables with p-value less than 5%, adjusted proportional  
38  
39 223 odds ratio (APOR) and 95% confidence interval.

## 24 224 **Patient and public involvement**

25  
26 225 Patients and/or the public were not involved in the design, or conduct, or reporting, or  
27  
28 226 dissemination plans of this research.

## 29 227 **Result**

## 228 **Individual and community-level characteristics of mothers and children**

229 The current study included 1,008 mothers who have children aged 12-23 months. Out of the total  
 230 respondents, more than half (52.78%) were in the age range of 25-34 years, nearly half (48.91%)  
 231 have not attended education, and almost one-third (32.14%) were Orthodox religion followers.  
 232 Four out of ten mothers (39.98%) were from high income households and the majorities (94.05%)  
 233 were currently in union. Among the participants, less than half (44.15%) were practiced home  
 234 delivery, nearly a quarter (24.31%) had no ANC visit, and almost one-tenth (13.99%) received  
 235 PNC service. Majority of the mothers (71.73%) kept immunization document and 88.1% of the  
 236 interviewed mothers have less than or equal to two under five children in their households. From  
 237 the total number of children, half (50.30%) were males, 22.72% were first-born, and 59.33% were  
 238 received the most recent vitamin A1. Three-fourth of respondents (73.51%) was from rural areas  
 239 and 12.6% were from Oromia region of the country (Table 1).

240 **Table 1: Individual and community-level characteristics of mothers of children aged 12-23**  
 241 **months in Ethiopia, 2019 (n=1008)**

| Variables                 | Frequency (n) | Percentage (%) |
|---------------------------|---------------|----------------|
| <b>Maternal age</b>       |               |                |
| 15-24                     | 298           | 29.56          |
| 25-34                     | 532           | 52.78          |
| 35-49                     | 178           | 17.66          |
| <b>Maternal education</b> |               |                |
| No education              | 493           | 48.91          |
| Primary                   | 342           | 33.93          |



|                                       |     |       |
|---------------------------------------|-----|-------|
| <b>Secondary</b>                      | 99  | 9.82  |
| <b>Higher</b>                         | 74  | 7.34  |
| <b>Marital status</b>                 |     |       |
| <b>Not in union</b>                   | 60  | 5.95  |
| <b>In union</b>                       | 948 | 94.05 |
| <b>Religion</b>                       |     |       |
| <b>Orthodox</b>                       | 324 | 32.14 |
| <b>Protestant</b>                     | 177 | 17.56 |
| <b>Muslim</b>                         | 481 | 47.72 |
| <b>Others</b>                         | 26  | 2.58  |
| <b>Relationship to household head</b> |     |       |
| <b>Household head</b>                 | 167 | 16.57 |
| <b>Wife or husband</b>                | 730 | 72.42 |
| <b>Others</b>                         | 111 | 11.01 |
| <b>Sex of household head</b>          |     |       |
| <b>Male</b>                           | 797 | 79.07 |
| <b>Female</b>                         | 211 | 20.93 |
| <b>Wealth index</b>                   |     |       |
| <b>Poor</b>                           | 469 | 46.53 |
| <b>Middle</b>                         | 136 | 13.49 |
| <b>Rich</b>                           | 403 | 39.98 |
| <b>Number of ANC visits</b>           |     |       |
| <b>None</b>                           | 245 | 24.31 |

|                                         |     |       |
|-----------------------------------------|-----|-------|
| <b>1-3 times</b>                        | 313 | 31.05 |
| <b>4 and above</b>                      | 450 | 44.64 |
| <b>Place of delivery</b>                |     |       |
| <b>Home</b>                             | 445 | 44.15 |
| <b>Health facility</b>                  | 563 | 55.85 |
| <b>PNC service</b>                      |     |       |
| <b>No</b>                               | 836 | 86.01 |
| <b>Yes</b>                              | 136 | 13.99 |
| <b>Sex of child</b>                     |     |       |
| <b>Male</b>                             | 507 | 50.30 |
| <b>Female</b>                           | 501 | 49.70 |
| <b>Birth order number</b>               |     |       |
| <b>1<sup>st</sup> born</b>              | 229 | 22.72 |
| <b>2<sup>nd</sup> to 3<sup>rd</sup></b> | 372 | 36.90 |
| <b>4<sup>th</sup> to 5<sup>th</sup></b> | 204 | 20.24 |
| <b>6<sup>th</sup> and above</b>         | 203 | 20.14 |
| <b>Presence of vaccination document</b> |     |       |
| <b>No</b>                               | 285 | 28.27 |
| <b>Yes</b>                              | 723 | 71.73 |
| <b>Preceding birth order</b>            |     |       |
| <b>&lt; 24 months</b>                   | 186 | 18.45 |
| <b>24-48</b>                            | 357 | 35.42 |
| <b>48 and above</b>                     | 465 | 46.13 |

**Received Vitamin A1**

|           |     |       |
|-----------|-----|-------|
| <b>No</b> | 410 | 40.67 |
|-----------|-----|-------|

|            |     |       |
|------------|-----|-------|
| <b>Yes</b> | 598 | 59.33 |
|------------|-----|-------|

**Total children ever born**

|                     |     |       |
|---------------------|-----|-------|
| <b>1-3 children</b> | 598 | 59.33 |
|---------------------|-----|-------|

|                     |     |       |
|---------------------|-----|-------|
| <b>4-6 children</b> | 278 | 27.58 |
|---------------------|-----|-------|

|                    |     |       |
|--------------------|-----|-------|
| <b>7 and above</b> | 132 | 13.10 |
|--------------------|-----|-------|

**Number of <5 children in household**

|          |     |       |
|----------|-----|-------|
| $\leq 2$ | 888 | 88.10 |
|----------|-----|-------|

|       |     |       |
|-------|-----|-------|
| $> 2$ | 120 | 11.90 |
|-------|-----|-------|

**Region**

|               |    |      |
|---------------|----|------|
| <b>Tigray</b> | 93 | 9.23 |
|---------------|----|------|

|               |     |       |
|---------------|-----|-------|
| <b>Amhara</b> | 111 | 11.01 |
|---------------|-----|-------|

|             |    |      |
|-------------|----|------|
| <b>Afar</b> | 99 | 9.82 |
|-------------|----|------|

|               |     |       |
|---------------|-----|-------|
| <b>Oromia</b> | 127 | 12.60 |
|---------------|-----|-------|

|               |    |      |
|---------------|----|------|
| <b>Somali</b> | 85 | 8.43 |
|---------------|----|------|

|                    |    |      |
|--------------------|----|------|
| <b>Benishabgul</b> | 83 | 8.23 |
|--------------------|----|------|

|              |     |       |
|--------------|-----|-------|
| <b>SNNPR</b> | 116 | 11.51 |
|--------------|-----|-------|

|                |    |      |
|----------------|----|------|
| <b>Gambela</b> | 77 | 7.64 |
|----------------|----|------|

|               |    |      |
|---------------|----|------|
| <b>Harari</b> | 73 | 7.24 |
|---------------|----|------|

|                    |    |      |
|--------------------|----|------|
| <b>Addis Ababa</b> | 64 | 6.35 |
|--------------------|----|------|

|                  |    |      |
|------------------|----|------|
| <b>Dire Dawa</b> | 80 | 7.94 |
|------------------|----|------|

**Type of place of residence**

|                                  |     |       |
|----------------------------------|-----|-------|
| <b>Urban</b>                     | 267 | 26.49 |
| <b>Rural</b>                     | 741 | 73.51 |
| <b>Community women education</b> |     |       |
| <b>Low</b>                       | 468 | 46.43 |
| <b>High</b>                      | 540 | 53.57 |
| <b>Community poverty</b>         |     |       |
| <b>Low</b>                       | 495 | 49.11 |
| <b>High</b>                      | 513 | 50.89 |
| <b>Community ANC utilization</b> |     |       |
| <b>Low</b>                       | 468 | 46.43 |
| <b>High</b>                      | 540 | 53.57 |

## 242 **Childhood vaccination status in Ethiopia**

243 The full vaccination coverage among children aged 12-23 months in Ethiopia was 39.09% (95%  
 244 CI: 36.06%, 42.28) (Fig. 2). On the other hand, two in ten children (22.32%) of 12-23 months' age  
 245 have not received any vaccination in three years before the 2019 survey period. Among the  
 246 children of 12-23 months' age included in the study, 70.24% received BCG, 57.84% received the  
 247 third dose of pentavalent, 55.75% received the third dose of polio, 60.62% received the second  
 248 dose of rotavirus vaccine, 55.16% received the third dose of PCV, and 57.04% received the first  
 249 dose of measles vaccination (Fig. 3).

## 250 **Factors affecting child vaccination in Ethiopia**

### 251 **The fixed effect analysis result**

252 The multivariable analysis showed that maternal educational level of mothers, maternal age,  
 253 marital status, presence of vaccination document, received Vitamin A<sub>1</sub>, region, and place of  
 254 residence, were significantly associated with childhood vaccination. Children whose mothers  
 255 attended primary, secondary, and higher education have 2.2 [AOR=2.16; 95% CI: 1.43-3.26], 2  
 256 [AOR=2.02; 95% CI: 1.07-3.79], and 2.7 [AOR=2.67; 95% CI: 1.25-5.71] times higher partial or  
 257 full vaccination respectively compared to born to mothers with no education. The odds of partial  
 258 or full vaccination was 1.8 [AOR=1.79; 95% CI: 1.08-2.99] times higher among children whose  
 259 mothers are in the age range of 35-49 compared to 15-19 age group. Mothers who are currently in  
 260 union have 2.2 [AOR=2.21; 95% CI: 1.06-4.58] times more likely to vaccinate their children either  
 261 partially or fully. keeping vaccination cards was 26 [AOR=26.18; 95% CI: 15.75-43.53] times  
 262 more likely associated with partial or full vaccination compared to not keeping vaccination cards.  
 263 Children who have received Vitamin A<sub>1</sub> have higher likelihood of partial or full vaccination  
 264 [AOR=4.14; 95% CI: 2.9-5.9]. Children from Afar [AOR=0.14; 95% CI: 0.04-0.45], Somali  
 265 [AOR=0.19; 95% CI: 0.06-0.60], Gambela [AOR=0.22; 95% CI: 0.06-0.77], Harari [AOR=0.14;  
 266 95% CI: 0.04-0.52], and Dire Dawa [AOR=0.23; 95% CI: 0.06-0.79] regions have less partial or  
 267 full vaccination compared to the Tigray region children. Children living in rural areas have 47%  
 268 [AOR=0.53; 95% CI: 0.30-0.93] reduced partial or full vaccination than children living in urban  
 269 areas of the country (Table 2).

270 **Table 2: Multivariable multilevel ordinal logistic regression analysis of individual and**  
 271 **community-level determinants of child vaccination in Ethiopia, 2019**

|           | Null  | Model I      | Model II     | Model III    |
|-----------|-------|--------------|--------------|--------------|
| Variables | Model | AOR (95% CI) | AOR (95% CI) | AOR (95% CI) |

1  
2  
3  
4  
5  
6  
7  
8  
9  
10  
11  
12  
13  
14  
15  
16  
17  
18  
19  
20  
21  
22  
23  
24  
25  
26  
27  
28  
29  
30  
31  
32  
33  
34  
35  
36  
37  
38  
39  
40  
41  
42  
43  
44  
45  
46  
47  
48  
49  
50  
51  
52  
53  
54  
55  
56  
57  
58  
59  
60**Maternal educational level**

|                     |                     |                      |
|---------------------|---------------------|----------------------|
| <b>No education</b> | 1                   | 1                    |
| <b>Primary</b>      | 1.97 (1.33, 2.93)** | 2.16 (1.43, 3.26)*** |
| <b>Secondary</b>    | 1.80 (0.97, 3.33)   | 2.02 (1.07, 3.79)*   |
| <b>Higher</b>       | 2.85 (1.35, 6.02)   | 2.67 (1.25, 5.71)*   |

**Maternal age**

|              |                    |                    |
|--------------|--------------------|--------------------|
| <b>15-24</b> | 1                  | 1                  |
| <b>25-34</b> | 1.13 (0.78, 1.63)  | 1.15 (0.79, 1.66)  |
| <b>35-49</b> | 1.81 (1.09, 3.02)* | 1.79 (1.08, 2.99)* |

**Religion**

|                   |                     |                   |
|-------------------|---------------------|-------------------|
| <b>Orthodox</b>   | 1                   | 1                 |
| <b>Protestant</b> | 0.46 (0.27, 0.77)** | 0.69 (0.36, 1.30) |
| <b>Muslim</b>     | 0.71 (0.47, 1.09)   | 1.28 (0.73, 2.24) |
| <b>Other</b>      | 0.39 (0.14, 1.22)   | 0.56 (0.18, 1.68) |

**Marital status**

|                     |                   |                    |
|---------------------|-------------------|--------------------|
| <b>Not in union</b> | 1                 | 1                  |
| <b>In union</b>     | 1.84 (0.89, 3.80) | 2.21 (1.06, 4.58)* |

**Relationship to HH head**

1  
2  
3  
4  
5  
6  
7  
8  
9  
10  
11  
12  
13  
14  
15  
16  
17  
18  
19  
20  
21  
22  
23  
24  
25  
26  
27  
28  
29  
30  
31  
32  
33  
34  
35  
36  
37  
38  
39  
40  
41  
42  
43  
44  
45  
46  
47  
48  
49  
50  
51  
52  
53  
54  
55  
56  
57  
58  
59  
60

|                               |                   |                   |
|-------------------------------|-------------------|-------------------|
| <b>Household head</b>         | 1                 | 1                 |
| <b>Wife or husband</b>        | 0.79 (0.50, 1.23) | 0.72 (0.46, 1.14) |
| <b>Others</b>                 | 0.67 (0.36, 1.27) | 0.62 (0.33, 1.17) |
| <b>Household wealth index</b> |                   |                   |
| <b>Poor</b>                   | 1                 | 1                 |
| <b>Middle</b>                 | 0.83 (0.51, 1.35) | 0.77 (0.47, 1.29) |
| <b>Rich</b>                   | 1.28 (0.83, 1.97) | 1.05 (0.63, 1.74) |
| <b>Number of ANC visits</b>   |                   |                   |
| <b>None</b>                   | 1                 | 1                 |
| <b>1-3</b>                    | 0.97 (0.61, 1.53) | 0.99 (0.63, 1.58) |
| <b>4 and above</b>            | 1.40 (0.86, 2.29) | 1.27 (0.77, 2.09) |
| <b>Place of delivery</b>      |                   |                   |
| <b>Home</b>                   | 1                 | 1                 |
| <b>Health facility</b>        | 1.22 (0.82, 1.83) | 1.11 (0.74, 1.66) |
| <b>PNC utilized</b>           |                   |                   |
| <b>No</b>                     | 1                 | 1                 |
| <b>Yes</b>                    | 1.04 (0.67, 1.63) | 1.05 (0.67, 1.65) |
| <b>Immunization document</b>  |                   |                   |

|    |                                       |                        |                       |
|----|---------------------------------------|------------------------|-----------------------|
| 1  |                                       |                        |                       |
| 2  |                                       |                        |                       |
| 3  | <b>Available</b>                      | 1                      | 1                     |
| 4  |                                       |                        |                       |
| 5  |                                       |                        |                       |
| 6  | <b>Not available</b>                  | 27.32 (16.44,45.41)*** | 26.18(15.75,43.53)*** |
| 7  |                                       |                        |                       |
| 8  |                                       |                        |                       |
| 9  | <b>Preceding birth interval</b>       |                        |                       |
| 10 |                                       |                        |                       |
| 11 |                                       |                        |                       |
| 12 | <b>&lt; 24 months</b>                 | 1                      | 1                     |
| 13 |                                       |                        |                       |
| 14 |                                       |                        |                       |
| 15 | <b>24-48 months</b>                   | 1.07 (0.69, 1.65)      | 1.04 (0.67, 1.62)     |
| 16 |                                       |                        |                       |
| 17 |                                       |                        |                       |
| 18 | <b>48 and above</b>                   | 1.05 (0.67, 1.65)      | 1.06 (0.67, 1.67)     |
| 19 |                                       |                        |                       |
| 20 |                                       |                        |                       |
| 21 | <b>Received Vitamin A<sub>1</sub></b> |                        |                       |
| 22 |                                       |                        |                       |
| 23 |                                       |                        |                       |
| 24 | <b>No</b>                             | 1                      | 1                     |
| 25 |                                       |                        |                       |
| 26 |                                       |                        |                       |
| 27 | <b>Yes</b>                            | 4.32 (3.04, 6.15)***   | 4.14 (2.9, 5.9)***    |
| 28 |                                       |                        |                       |
| 29 |                                       |                        |                       |
| 30 | <b>Number of &lt; 5 children</b>      |                        |                       |
| 31 |                                       |                        |                       |
| 32 |                                       |                        |                       |
| 33 | <b>≤ 2 children</b>                   | 1                      | 1                     |
| 34 |                                       |                        |                       |
| 35 |                                       |                        |                       |
| 36 | <b>&gt;2 children</b>                 | 0.62 (0.36, 1.07)      | 0.68 (0.39, 1.16)     |
| 37 |                                       |                        |                       |
| 38 |                                       |                        |                       |
| 39 | <b>Region</b>                         |                        |                       |
| 40 |                                       |                        |                       |
| 41 |                                       |                        |                       |
| 42 | <b>Tigray</b>                         | 1                      | 1                     |
| 43 |                                       |                        |                       |
| 44 |                                       |                        |                       |
| 45 | <b>Afar</b>                           | 0.08 (0.03, 0.23)***   | 0.14 (0.04, 0.45)**   |
| 46 |                                       |                        |                       |
| 47 |                                       |                        |                       |
| 48 | <b>Amhara</b>                         | 0.59 (0.24, 1.48)      | 0.5 (0.22, 1.13)      |
| 49 |                                       |                        |                       |
| 50 |                                       |                        |                       |
| 51 | <b>Oromia</b>                         | 0.21 (0.09, 0.48)***   | 0.45 (0.18, 1.09)     |
| 52 |                                       |                        |                       |
| 53 |                                       |                        |                       |
| 54 | <b>Somali</b>                         | 0.08 (0.03, 0.22)***   | 0.19 (0.06, 0.60)**   |
| 55 |                                       |                        |                       |
| 56 |                                       |                        |                       |
| 57 |                                       |                        |                       |
| 58 |                                       |                        |                       |
| 59 |                                       |                        |                       |
| 60 |                                       |                        |                       |



|    |                                   |                      |                     |
|----|-----------------------------------|----------------------|---------------------|
| 1  |                                   |                      |                     |
| 2  |                                   |                      |                     |
| 3  | <b>Benishangul</b>                | 1.13 (0.37, 3.40)    | 0.74 (0.25, 2.22)   |
| 4  |                                   |                      |                     |
| 5  |                                   |                      |                     |
| 6  | <b>SNNPR</b>                      | 0.19 (0.08, 0.45)*** | 0.48 (0.19, 1.17)   |
| 7  |                                   |                      |                     |
| 8  |                                   |                      |                     |
| 9  | <b>Gambella</b>                   | 0.38 (0.12, 1.22)    | 0.22 (0.06, 0.77)*  |
| 10 |                                   |                      |                     |
| 11 |                                   |                      |                     |
| 12 | <b>Harari</b>                     | 0.43 (0.12, 1.48)    | 0.14 (0.04, 0.52)** |
| 13 |                                   |                      |                     |
| 14 |                                   |                      |                     |
| 15 | <b>Addis Ababa</b>                | 1.27 (0.39, 4.14)    | 1.14 (0.37, 3.47)   |
| 16 |                                   |                      |                     |
| 17 |                                   |                      |                     |
| 18 | <b>Dire Dawa</b>                  | 0.78 (0.23, 2.62)    | 0.23 (0.06, 0.79)*  |
| 19 |                                   |                      |                     |
| 20 |                                   |                      |                     |
| 21 | <b>Type of place of residence</b> |                      |                     |
| 22 |                                   |                      |                     |
| 23 |                                   |                      |                     |
| 24 | <b>Urban</b>                      | 1                    | 1                   |
| 25 |                                   |                      |                     |
| 26 |                                   |                      |                     |
| 27 | <b>Rural</b>                      | 0.25 (0.14, 0.44)*** | 0.53 (0.30, 0.93)*  |
| 28 |                                   |                      |                     |
| 29 |                                   |                      |                     |
| 30 | <b>Community women</b>            |                      |                     |
| 31 |                                   |                      |                     |
| 32 | <b>education</b>                  |                      |                     |
| 33 |                                   | 1                    | 1                   |
| 34 |                                   |                      |                     |
| 35 | <b>Low</b>                        | 1.04 (0.56, 1.94)    | 0.75 (0.51, 1.10)*  |
| 36 |                                   |                      |                     |
| 37 |                                   |                      |                     |
| 38 | <b>High</b>                       |                      |                     |
| 39 |                                   |                      |                     |
| 40 |                                   |                      |                     |

272 Key \* =  $p < 0.05$ , \*\* =  $p < 0.01$ , \*\*\* =  $p < 0.001$

### 273 The random effect analysis result

274 Table 3 presents the random effect analysis result of childhood vaccination status in Ethiopia. The  
 275 appropriateness of application of multilevel analysis and the presence of significant variations of  
 276 childhood vaccination status between clusters (the clustering effect) was justified by the ICC of  
 277 Null model (48.19%). The value of ICC decreased from 48.19% in the null model to 14.55% in

278 the final model showing how the effect of clustering changed. In addition, as depicted in the table  
 279 below the largest PCV of the final model (81.70%) indicates the goodness of model fitness. The  
 280 final model (Model 3) has the highest capacity than model I or model II alone to explain the  
 281 variations in childhood vaccination status. On top of that, Model III is the best explanatory model  
 282 to show the variation in the childhood vaccination. The deviance observed in the final model was  
 283 smaller than that of other models (Table 3).

284 **Table 3: Random effects analysis and model fit statistics of child vaccination in Ethiopia,**  
 285 **2019**

| Parameters                    | Null Model | Model I  | Model II | Model III |
|-------------------------------|------------|----------|----------|-----------|
| Community level Variance (SE) | 3.06       | 0.76     | 1.21     | 0.56      |
| PCV (%)                       | Reference  | 75.16%   | 60.46%   | 81.70%    |
| ICC (%)                       | 48.19%     | 18.77%   | 26.89%   | 14.55%    |
| MOR                           | 5.31       | 2.29     | 2.84     | 2.03      |
| Log-likelihood                | -988.74    | -684.36  | -919.88  | -667.78   |
| Deviance                      | 1,977.48   | 1,368.72 | 1,839.76 | 1,335.56  |
| AIC                           | 1983.49    | 1418.72  | 1873.77  | 1413.56   |
| BIC                           | 1998.24    | 1540.70  | 1957.34  | 1603.86   |

## 286 Discussion

287 In Ethiopia, full vaccination was 39.08%. Compared to other studies in the country, it is less than  
 288 that of South East Ethiopia 76.8%(26), country-level pooled prevalence (47%)(27), and 67% in  
 289 2016 from other study(35). It is also less than 59.40% Sub-Saharan vaccination coverage(22),  
 290 69.21% East Africa(35), 45.2% Mogadishu (23), and 69.3% in Togo coverage(25). It is in the

1  
2  
3 291 same confidence intervals as 38.3% of 2016 EDHS. This indicates that the current prevalence of  
4  
5 292 full vaccination was unchanged since 2016. The reasons might be the political instabilities in the  
6  
7 293 country for the last five years. Dropout rate (18.8%) may also negatively affected childhood  
8  
9 294 vaccination coverage of the country. The inequalities to access health services regardless of  
10  
11 295 increased population in those years might be another reason. Lack of maternal education (48.91%)  
12  
13 296 also affected vaccination coverage undesirably; however, it was 67% in 2015(31). It is also better  
14  
15 297 than the Sub-Saharan African countries average(22). This shows that although there are some  
16  
17 298 improvements, the deviation from standard is big. Only 39.98% of mothers were from higher  
18  
19 299 income families. The finding is consistent with 36.6% coverage from other study(31).  
20  
21  
22  
23

24 300 Among the associated factors, maternal education had positive association with higher full or  
25  
26 301 partial vaccination, which is also similar to findings from other studies(22,31,36). The consistence  
27  
28 302 might indicate that education is an independent predictor of full or partial Ffivaccination, which  
29  
30 303 needs focused attention. Increased maternal age puts mothers in the higher level of full  
31  
32 304 immunization category. Other studies also showed that higher age has association with full  
33  
34 305 immunization(3,22). This might indicate that maternal maturity is an important factor for higher  
35  
36 306 childhood vaccination in contrast to the early marriage. This means child bearing at younger age,  
37  
38 307 and age at first birth needs adequate attention. Children whose mothers remained in union had  
39  
40 308 higher tendency to be in higher category of full vaccination. From previous studies, there are  
41  
42 309 consistent findings(22,23). This might be an indication that disrupted families might endanger  
43  
44 310 children's life and so that family union should be promoted. Mothers who keep evidence of  
45  
46 311 vaccination tend to be in higher category of vaccination coverage. This is also true for some  
47  
48 312 studies(23,24,31). This means, women who keeps children evidence of vaccination might have  
49  
50 313 indeed great regards for full immunization while carelessness might start from poor evidence  
51  
52  
53  
54  
55  
56  
57  
58  
59  
60

1  
2  
3 314 keeping. Children who received Vitamin A<sub>1</sub> had higher chance of being vaccination category. The  
4  
5 315 fact that vitamin A is schedule towards the end of most immunization program might raise to this  
6  
7  
8 316 association (19). This might be another persist issue we never eased in previous efforts as per  
9  
10 317 evidence from this study and could be set as an objective to attain other sub-objectives. Ethiopia  
11  
12 318 further classified in city administrations, agrarian, and pastoralist regions. Pastoralists regions such  
13  
14 319 as Afar and Somali and semi pastoralist regions such as Gambela, Benishangul Gumuz and Harari  
15  
16 320 had higher tendency of failing into low category of full immunization. This is also reported by  
17  
18 321 other studies (31). This is also confirmed by other studies that compared developed and  
19  
20 322 underdeveloped regions in Ethiopia(31,36). This apparently shows that attention deprived regions  
21  
22 323 should be the next intervention areas. This problem is relatively similar between the rural and  
23  
24 324 urban place of residences. Other studies also laud that inequalities between rural and urban  
25  
26 325 residence need careful considerations(20). This might be apparently due to access, awareness, and  
27  
28 326 availability of resources.  
29  
30  
31  
32

33  
34 327 Besides the positive information, this study has also some limitations such as missing data in some  
35  
36 328 records, the disproportion of sample in each region, secondary source data, and time-lapse between  
37  
38 329 data collection and this analysis. When observable evidence of vaccination is not available, data  
39  
40 330 collectors asked mothers orally and that may cause some recall and social desirability bias.  
41  
42 331 However, a Health Facility Questionnaire was used to record vaccination information for all  
43  
44 332 children without a vaccination card seen during the mother's interview(34). Moreover, we are  
45  
46 333 unable to include some relevant variables like psychosocial variables of parents, vaccine hesitancy  
47  
48 334 and other related variables since this study used a secondary data of a national survey. The authors  
49  
50 335 followed international protocols of DHS data process and analyses, weighted data, carefully  
51  
52 336 interpreted finding within the period, and included complete records.  
53  
54  
55  
56  
57  
58  
59  
60

## 337 **Conclusion**

338 Although full vaccination increased from EDHS 2000 to 2016, the current analysis of EMDHS  
339 2019 result showed that it was remained unchanged. Our analysis identified many factors that  
340 might be contributed for the absence of changes. Maternal educational level, maternal age, marital  
341 status, presence of vaccination document, received Vitamin A<sub>1</sub>, region, and place of residence,  
342 were some of the contributors. Analyzing associated factors showed some of the factors are old  
343 enough causing the problem for decades. Even though the political situation in the country might  
344 also contributed to the persistency of these factors, it is advisable to work on accessibility,  
345 awareness, and available are vital. Maternal education and poverty especially family and maternal  
346 capacity remained critical and need all round efforts such as further government commitment,  
347 dedicated international supports, and peace and security can override the problem.

348 **Abbreviation/Acronyms:** Demographic Health Survey (DHS); Ethiopian Demographic Health  
349 Survey (EDHS); Ethiopian Mini-Demographic Health Survey( EMDHS); World Health  
350 Organization (WHO); United Nations Children’s Fund (UNICEF); Adjusted Odds Ratio (AOR);  
351 Antenatal Care (ANC); Postnatal Care (PNC); Pneumococcal Conjugate Vaccine (PCV); and  
352 Measles Containing Vaccine (MCV); Bacille Calmette-Guerin (BCG); South Nations  
353 Nationalities and Peoples Region (SNNPR); Intra-class Correlation Coefficient (ICC); Median  
354 Odds Ratio (MOR), Confidence Interval (CI)

## 355 **Declarations**

### 356 **Ethics approval and consent to participate**

357 This study used secondary data from demographic and health survey data files. Initially, the  
358 MEASURE DHS team was formally requested to access the datasets by completing the online

1  
2  
3 359 request form on their website ([www.dhsprogram.com](http://www.dhsprogram.com)). Accordingly, permission to access the data  
4  
5 360 and the letter of authorization was obtained from ICF international. Therefore, for this study  
6  
7  
8 361 consent to participate is not applicable. We kept all data confidential, and no effort was made to  
9  
10 362 identify households or individuals. The Ethiopian Health Nutrition and Research Institute  
11  
12 363 (EHNRI) Review Board and the National Research Ethics Review Committee (NRERC) at the  
13  
14 364 Ministry of Science and Technology of Ethiopia, approved EMDHS 2019. The authors also  
15  
16 365 confirm that all methods were carried out in accordance with relevant guidelines and regulations.  
17  
18  
19

#### 20 366 **Consent for publication**

21  
22 367 Not applicable  
23

#### 24 368 **Availability of data and materials**

25  
26  
27 369 The survey dataset used in this analysis are third party data from the demographic and health  
28  
29 370 survey website ([www.dhsprogram.com](http://www.dhsprogram.com)) and permission to access the data is granted only for  
30  
31 371 registered DHS data user.  
32  
33

#### 34 372 **Competing interests**

35  
36  
37 373 The authors have declared that no competing interest existed.  
38

#### 39 374 **Funding**

40  
41 375 The authors received no specific funding for this work.  
42  
43

#### 44 376 **Authors' contribution**

45  
46 377 SS has obtained and analyzed the EMDHS data. SS, GG, SH were equally involved in the  
47  
48 378 conception of the study, interpreted the results, drafted and critically revised the manuscript. All  
49  
50 379 authors have read and approved the final version of the manuscript.  
51  
52  
53

#### 54 380 **Acknowledgments**

55  
56  
57  
58  
59  
60

1  
2  
3 381 The authors are grateful to Measure DHS, ICF International Rockville, Maryland, USA for  
4  
5 382 allowing us to use the 2019 EMDHS data.  
6  
7  
8  
9  
10  
11  
12  
13  
14  
15  
16  
17  
18  
19  
20  
21  
22  
23  
24  
25  
26  
27  
28  
29  
30  
31  
32  
33  
34  
35  
36  
37  
38  
39  
40  
41  
42  
43  
44  
45  
46  
47  
48  
49  
50  
51  
52  
53  
54  
55  
56  
57  
58  
59  
60

1  
2  
3 384 **References**  
4  
5

- 6 385 1. WHO vaccine-preventable diseases : monitoring system . 2020 global summary.  
7  
8 386 2022;2020:2–3.  
9  
10  
11 387 2. Chepkurui V, Amponsah-dacosta E, Haddison EC. Characterization of National  
12  
13 388 Immunization Programs in the Context of Public Health Emergencies : A Case Study of  
14  
15 389 13 Countries in the WHO Africa Region. *Front public Heal*. 2021;9(September):1–12.  
16  
17  
18  
19 390 3. South Africa : WHO and UNICEF estimates of immunization coverage : 2016 revision  
20  
21 391 South Africa : WHO and UNICEF estimates of immunization coverage : 2016 revision.  
22  
23 392 2018;1–18.  
24  
25  
26 393 4. WHO. Immunization coverage. 2022;(July 2021):3–7.  
27  
28  
29 394 5. Patel MK, Goodson JL, Alexander JP Jr., et al. Progress Toward Regional Measles  
30  
31 395 Elimination — Worldwide, 2000–2019. *MMWR Morb Mortal Wkly Rep* 2020;69:1700–  
32  
33 396 1705. Poliomyelitis. World Health Organization; 2019.  
34  
35  
36  
37 397 6. World Health Organization [WHO]. Counting the impact of vaccines. 2021;(April):2017–  
38  
39 398 9.  
40  
41  
42 399 7. FMOH. Expanded Program on Immunization (EPI). 2022. p. 1–4.  
43  
44  
45 400 8. Klein S. Why Some Vaccines Require More Than One Dose. 2015. p. 1–3.  
46  
47  
48 401 9. WHO. Why Immunizing Children Matters. 2017. p. 1–3.  
49  
50  
51 402 10. Children’s hospital of Philadelphia. Did You Know: Some Reasons Vaccines Are Given  
52  
53 403 in Multiple Doses. 2014.  
54  
55  
56  
57  
58  
59  
60



- 1  
2  
3 404 11. Greenwood B. 2014 The contribution of vaccination to global health: past, present and  
4  
5 405 future. *Phil. Trans. R. Soc. B.* 2014; 369: 20130433.  
6  
7 406 <http://dx.doi.org/10.1098/rstb.2013.0433>.  
8  
9  
10 407 12. Rodrigues CMC, Plotkin SA. Impact of Vaccines; Health, Economic and Social  
11  
12 408 Perspectives. *Front Microbiol.* 2020;11(July).  
13  
14  
15 409 13. Ghendon Y. Vaccine preventable viral diseases in developing countries. *World J*  
16  
17 410 *Microbiol Biotechnol.* 1991 Mar;7(2):115-20. doi: 10.1007/BF00328980. PMID:  
18  
19 411 24424922.  
20  
21  
22 412 14. Brenzel L, Wolfson LJ, Fox-Rushby J, et al. Vaccine-preventable Diseases. In: Jamison  
23  
24 413 DT, Breman JG, Measham AR, et al., editors. *Disease Control Priorities in Developing*  
25  
26 414 *Countries.* 2nd edition. Washington (DC): The International Bank for Reconstruction a.  
27  
28  
29 415 15. Ethiopia : WHO and UNICEF estimates of immunization coverage : 2019 revision  
30  
31 416 Ethiopia : WHO and UNICEF estimates of immunization coverage : 2019 revision.  
32  
33 417 2021;1–28.  
34  
35  
36 418 16. WHO. Immunization WHO Regional Office for Africa. :199–207. Available from:  
37  
38 419 <https://www.afro.who.int/health-topics/immunization>  
39  
40  
41 420 17. WHO. Organisation Mondiale Vaccine-Preventable Diseases And Immunization. 2021;71.  
42  
43  
44 421 18. Raslan R, El Sayegh S, Chams S, Chams N, Leone A, Hajj Hussein I. Re-Emerging  
45  
46 422 Vaccine-Preventable Diseases in War-Affected Peoples of the Eastern Mediterranean  
47  
48 423 Region—An Update. *Front Public Heal.* 2017;5(October):1–8.  
49  
50  
51 424 19. WHO. Global Immunization News (GIN). 2017;(January).  
52  
53  
54  
55  
56  
57  
58  
59  
60

- 1  
2  
3 425 20. Shibre G, Zegeye B, Idriss-wheeler D, Yaya S. Inequalities in measles immunization  
4  
5 426 coverage in Ethiopia : a cross-sectional analysis of demographic and health surveys 2000  
6  
7 427 – 2016. *BMC Infect Dis.* 2020;20:1–12.  
8  
9  
10 428 21. Figueiredo A De, Were F. Local trends in immunisation coverage across Africa. *Lancet.*  
11  
12 429 2019;393(10183):1779–81.  
13  
14  
15 430 22. Fenta SM, Biresaw HB, Fentaw KD. Determinants of full childhood immunization among  
16  
17 431 children aged 12 – 23 months in sub-Saharan Africa : a multilevel analysis using  
18  
19 432 Demographic and Health Survey Data. *Trop Med Health.* 2021;49:29.  
20  
21  
22 433 23. Mohamud MHT, Magan MA, Mohamed LM, Mohamud MA, Muse AA. Barriers for full  
23  
24 434 immunization coverage among under 5 years children in Mogadishu , Somalia. *J Fam*  
25  
26 435 *Med Prim Care.* 2020;9(6):2664–9.  
27  
28  
29 436 24. Yadita ZS, Ayehubizu LM (2021) Full immunization coverage and associated factors  
30  
31 437 among children aged 12–23 months in Somali Region, Eastern Ethiopia. *PLoS ONE.*2021  
32  
33 438 16(12): e0260258. <https://doi.org/10.1371/journal.pone.0260258>.  
34  
35  
36  
37 439 25. Zida-Compaore WIC, Ekouevi DK, Gbeasor-Komlanvi FA, Sewu EK, Blatome T,  
38  
39 440 Gbadoe AD, et al. Immunization coverage and factors associated with incomplete  
40  
41 441 vaccination in children aged 12 to 59 months in health structures in Lomé. *BMC Res*  
42  
43 442 *Notes.* 2019;12(1):1–7.  
44  
45  
46  
47 443 26. Legesse E, Dechasa W. An assessment of child immunization coverage and its  
48  
49 444 determinants in Sinana District , Southeast. ??? [Internet]. 2015;1–14. Available from: ???  
50  
51  
52  
53 445 27. Nour TY, Farah AM, Ali OM, Abate KH. Immunization coverage in Ethiopia among 12 –  
54  
55  
56  
57  
58  
59  
60

- 1  
2  
3 446 23 month old children : systematic review and meta-analysis. 2020;1–12.  
4  
5  
6 447 28. Ethiopian Public Health Institute (EPHI) [Ethiopia] and ICF. 2021. Ethiopia Mini  
7  
8 448 Demographic and Health Survey 2019: Final Report. Rockville, Maryland, USA: EPHI  
9  
10 449 and ICF. Vailable from: <https://dhsprogram.com/pubs/pdf/FR363/FR363.pdf>.  
11  
12  
13 450 29. Ethiopian Public Health Institute (EPHI) and ICF. 2019. Mini Demographic and Health  
14  
15 451 Survey 2019: key Indicators. Rockville, Maryland, USA: EPHI and ICF. 2019. 35 p.  
16  
17  
18 452 30. Bangura JB, Xiao S, Qiu D, Ouyang F, Chen L. Barriers to childhood immunization in  
19  
20 453 sub- Saharan Africa : A systematic review. 2020;20:1108.  
21  
22  
23 454 31. Lakew Y, Bekele A, Biadgilign S. Factors influencing full immunization coverage among  
24  
25 455 12 – 23 months of age children in Ethiopia : evidence from the national demographic and  
26  
27 456 health survey in 2011. BMC Public Health. 2015;15:1–8.  
28  
29  
30 457 32. Girmay A, Dadi AF. Full Immunization Coverage and Associated Factors among Children  
31  
32 458 Aged 12-23 Months in a Hard-to-Reach Areas of Ethiopia. hindawi. 2019;2019:8.  
33  
34  
35 459 33. Ministry of Health-Ethiopia. Health Sector Transformation Plan II (HSTP) (2021-2025).  
36  
37 460 2021.  
38  
39  
40 461 34. Ethiopian Public Health Institute (EPHI) [Ethiopia] and ICFICF. (2019). Ethiopia Mini  
41  
42 462 Demographic and Health Survey: Key Indicators. Rockville, Maryland, USA: EPHI and  
43  
44 463 ICF.  
45  
46  
47  
48 464 35. Gelaye SS, Yenit MK, Baraki AG. Rural Vaccination Coverage Among Children Aged  
49  
50 465 12–23 Months Was Higher Than the Urban Counterparts: A Comparative Cross-Sectional  
51  
52 466 Study in Pawi District, Ethiopia. *Pediatr Heal Med Ther*. 2021;Volume 12:119–27.  
53  
54  
55  
56  
57  
58  
59  
60

1  
2  
3  
4  
5  
6  
7  
8  
9  
10  
11  
12  
13  
14  
15  
16  
17  
18  
19  
20  
21  
22  
23  
24  
25  
26  
27  
28  
29  
30  
31  
32  
33  
34  
35  
36  
37  
38  
39  
40  
41  
42  
43  
44  
45  
46  
47  
48  
49  
50  
51  
52  
53  
54  
55  
56  
57  
58  
59  
60

467 36. Wondimu A, Cao Q, Asuman D, Almansa J, Postma MJ. Understanding the Improvement  
468 in Full Childhood Vaccination Coverage in Ethiopia Using Oaxaca – Blinder  
469 Decomposition Analysis. 2020;1–11.

470

471

472

473

474

475

For peer review only

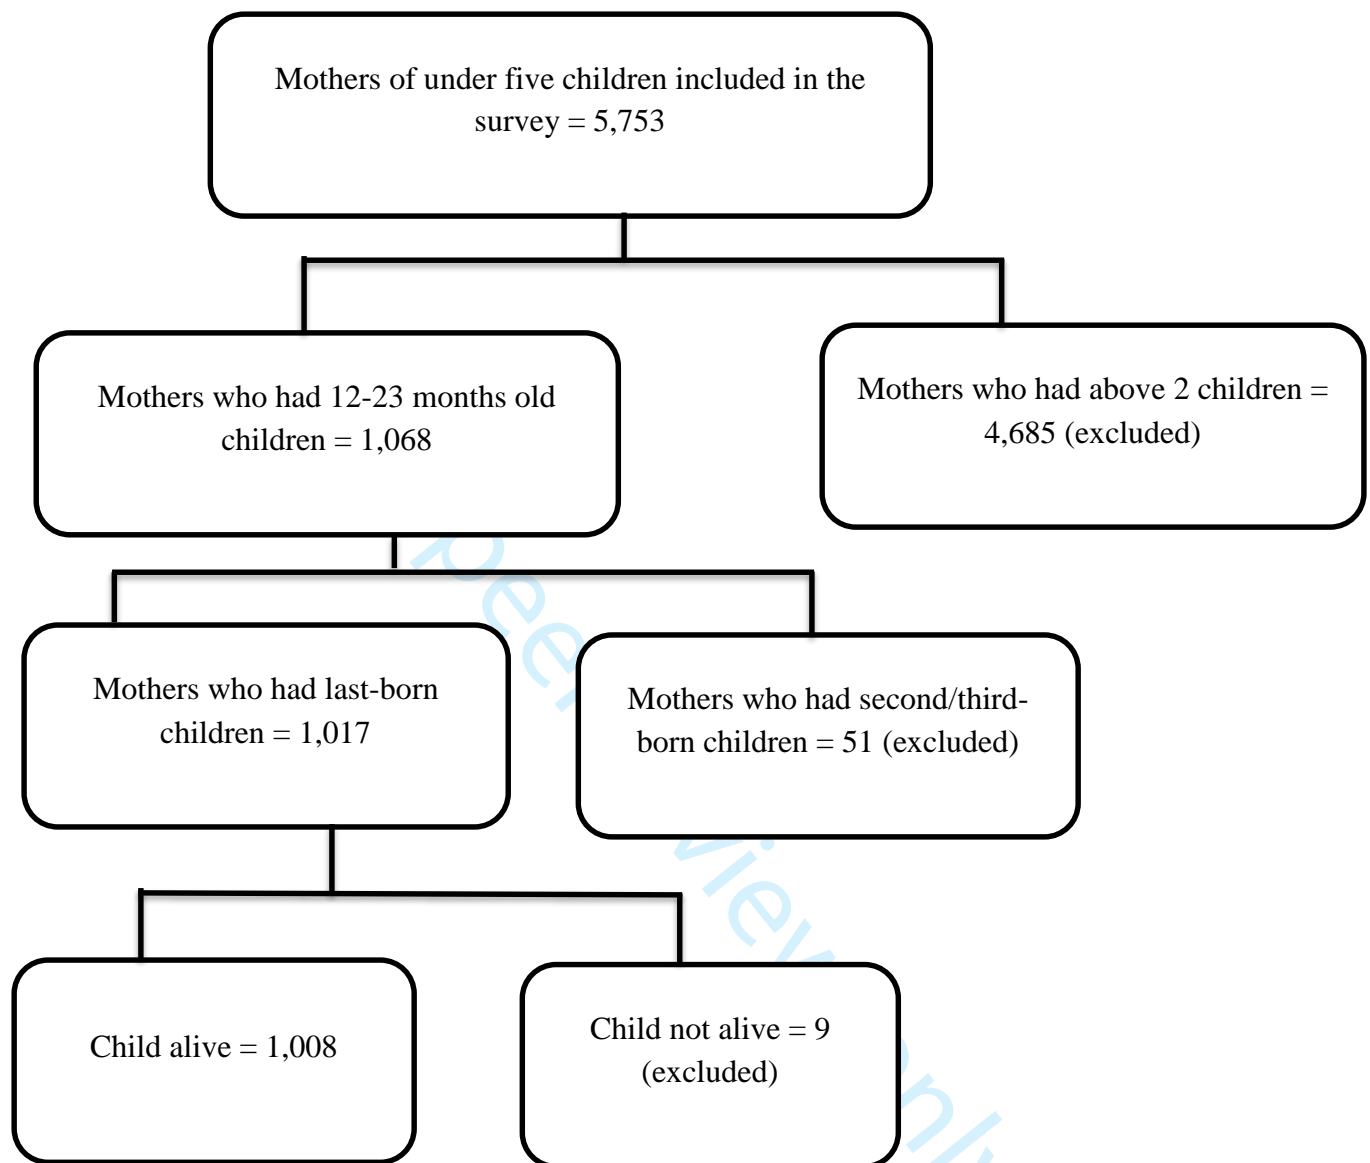

**Fig. 1: Eligibility assessment for childhood vaccination coverage among children aged 12-23 month's in Ethiopia, 2019**

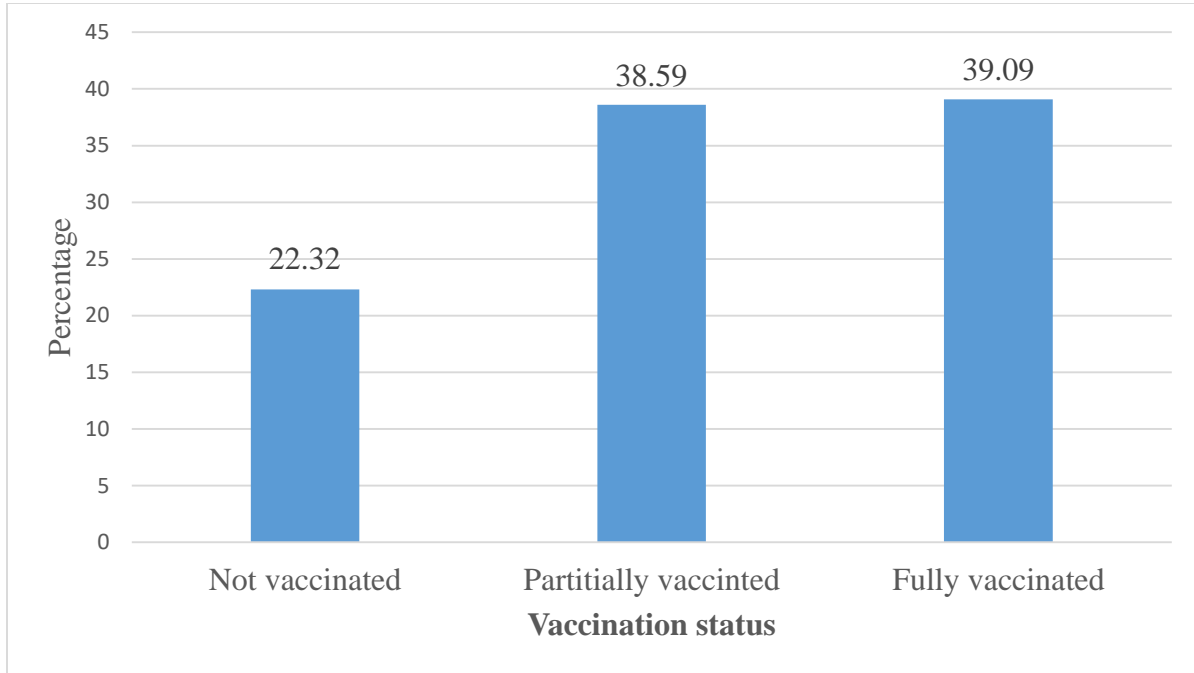

**Fig. 2: Vaccination status of children aged 12-23 months in Ethiopia, 2019**

review only



**Fig. 3: Percentage of children aged 12-23 months who received a particular vaccine in Ethiopia, 2019**

**STROBE Statement—Checklist of items that should be included in reports of cross-sectional studies**

|                              | Item No | Recommendation                                                                                                                                                                                               | Reported on page # |
|------------------------------|---------|--------------------------------------------------------------------------------------------------------------------------------------------------------------------------------------------------------------|--------------------|
| <b>Title and abstract</b>    | 1       | (a) Indicate the study's design with a commonly used term in the title or the abstract                                                                                                                       | 1                  |
|                              |         | (b) Provide in the abstract an informative and balanced summary of what was done and what was found                                                                                                          | 2                  |
| <b>Introduction</b>          |         |                                                                                                                                                                                                              |                    |
| Background/rationale         | 2       | Explain the scientific background and rationale for the investigation being reported                                                                                                                         | 4-6                |
| Objectives                   | 3       | State specific objectives, including any prespecified hypotheses                                                                                                                                             | 6                  |
| <b>Methods</b>               |         |                                                                                                                                                                                                              |                    |
| Study design                 | 4       | Present key elements of study design early in the paper                                                                                                                                                      | 7                  |
| Setting                      | 5       | Describe the setting, locations, and relevant dates, including periods of recruitment, exposure, follow-up, and data collection                                                                              | 7                  |
| Participants                 | 6       | (a) Give the eligibility criteria, and the sources and methods of selection of participants                                                                                                                  | 7                  |
| Variables                    | 7       | Clearly define all outcomes, exposures, predictors, potential confounders, and effect modifiers. Give diagnostic criteria, if applicable                                                                     | 8-10               |
| Data sources/<br>measurement | 8*      | For each variable of interest, give sources of data and details of methods of assessment (measurement). Describe comparability of assessment methods if there is more than one group                         | 8-9                |
| Bias                         | 9       | Describe any efforts to address potential sources of bias                                                                                                                                                    | -                  |
| Study size                   | 10      | Explain how the study size was arrived at                                                                                                                                                                    | 8                  |
| Quantitative variables       | 11      | Explain how quantitative variables were handled in the analyses. If applicable, describe which groupings were chosen and why                                                                                 | 10-11              |
| Statistical methods          | 12      | (a) Describe all statistical methods, including those used to control for confounding                                                                                                                        | NA                 |
|                              |         | (b) Describe any methods used to examine subgroups and interactions                                                                                                                                          | NA                 |
|                              |         | (c) Explain how missing data were addressed                                                                                                                                                                  | -                  |
|                              |         | (d) If applicable, describe analytical methods taking account of sampling strategy                                                                                                                           | NA                 |
|                              |         | (e) Describe any sensitivity analyses                                                                                                                                                                        | NA                 |
| <b>Results</b>               |         |                                                                                                                                                                                                              |                    |
| Participants                 | 13*     | (a) Report numbers of individuals at each stage of study—eg numbers potentially eligible, examined for eligibility, confirmed eligible, included in the study, completing follow-up, and analysed            | NA                 |
|                              |         | (b) Give reasons for non-participation at each stage                                                                                                                                                         | NA                 |
|                              |         | (c) Consider use of a flow diagram                                                                                                                                                                           | NA                 |
| Descriptive data             | 14*     | (a) Give characteristics of study participants (eg demographic, clinical, social) and information on exposures and potential confounders                                                                     | 12-16              |
|                              |         | (b) Indicate number of participants with missing data for each variable of interest                                                                                                                          | NA                 |
| Outcome data                 | 15*     | Report numbers of outcome events or summary measures                                                                                                                                                         | 16                 |
| Main results                 | 16      | (a) Give unadjusted estimates and, if applicable, confounder-adjusted estimates and their precision (eg, 95% confidence interval). Make clear which confounders were adjusted for and why they were included | 16-21              |
|                              |         | (b) Report category boundaries when continuous variables were categorized                                                                                                                                    | NA                 |
|                              |         | (c) If relevant, consider translating estimates of relative risk into absolute risk for a meaningful time period                                                                                             | NA                 |
| Other analyses               | 17      | Report other analyses done—eg analyses of subgroups and interactions, and                                                                                                                                    | NA                 |



|                          |    |                                                                                                                                                                            |       |
|--------------------------|----|----------------------------------------------------------------------------------------------------------------------------------------------------------------------------|-------|
|                          |    | sensitivity analyses                                                                                                                                                       |       |
| <b>Discussion</b>        |    |                                                                                                                                                                            |       |
| Key results              | 18 | Summarise key results with reference to study objectives                                                                                                                   | 22    |
| Limitations              | 19 | Discuss limitations of the study, taking into account sources of potential bias or imprecision. Discuss both direction and magnitude of any potential bias                 | 24    |
| Interpretation           | 20 | Give a cautious overall interpretation of results considering objectives, limitations, multiplicity of analyses, results from similar studies, and other relevant evidence | 23-24 |
| Generalisability         | 21 | Discuss the generalisability (external validity) of the study results                                                                                                      | 22-24 |
| <b>Other information</b> |    |                                                                                                                                                                            |       |
| Funding                  | 22 | Give the source of funding and the role of the funders for the present study and, if applicable, for the original study on which the present article is based              | 26    |

For peer review only

# BMJ Open

## Determinants of childhood vaccination among children aged 12–23 months in Ethiopia: A community-based cross-sectional study

|                                 |                                                                                                                                                                                                                                                                                                                                                                                                                                                                                                           |
|---------------------------------|-----------------------------------------------------------------------------------------------------------------------------------------------------------------------------------------------------------------------------------------------------------------------------------------------------------------------------------------------------------------------------------------------------------------------------------------------------------------------------------------------------------|
| Journal:                        | <i>BMJ Open</i>                                                                                                                                                                                                                                                                                                                                                                                                                                                                                           |
| Manuscript ID                   | bmjopen-2022-069278.R2                                                                                                                                                                                                                                                                                                                                                                                                                                                                                    |
| Article Type:                   | Original research                                                                                                                                                                                                                                                                                                                                                                                                                                                                                         |
| Date Submitted by the Author:   | 15-Feb-2023                                                                                                                                                                                                                                                                                                                                                                                                                                                                                               |
| Complete List of Authors:       | Sako, Sewunet; Arba Minch University, College of Medicine and Health Sciences, School of Public Health, Department of Health Informatics, Arba Minch, Ethiopia<br>Gilano, Girma; Arba Minch University, College of Medicine and Health Sciences, School of Public Health, Department of Health Informatics, Arba Minch, Ethiopia<br>Samuel, Hailegebreal; Arba Minch University, College of Medicine and Health Sciences, School of Public Health, Department of Health Informatics, Arba Minch, Ethiopia |
| <b>Primary Subject Heading</b>: | Public health                                                                                                                                                                                                                                                                                                                                                                                                                                                                                             |
| Secondary Subject Heading:      | Health services research                                                                                                                                                                                                                                                                                                                                                                                                                                                                                  |
| Keywords:                       | Community child health < PAEDIATRICS, PREVENTIVE MEDICINE, PUBLIC HEALTH                                                                                                                                                                                                                                                                                                                                                                                                                                  |
|                                 |                                                                                                                                                                                                                                                                                                                                                                                                                                                                                                           |

SCHOLARONE™  
Manuscripts



I, the Submitting Author has the right to grant and does grant on behalf of all authors of the Work (as defined in the below author licence), an exclusive licence and/or a non-exclusive licence for contributions from authors who are: i) UK Crown employees; ii) where BMJ has agreed a CC-BY licence shall apply, and/or iii) in accordance with the terms applicable for US Federal Government officers or employees acting as part of their official duties; on a worldwide, perpetual, irrevocable, royalty-free basis to BMJ Publishing Group Ltd ("BMJ") its licensees and where the relevant Journal is co-owned by BMJ to the co-owners of the Journal, to publish the Work in this journal and any other BMJ products and to exploit all rights, as set out in our [licence](#).

The Submitting Author accepts and understands that any supply made under these terms is made by BMJ to the Submitting Author unless you are acting as an employee on behalf of your employer or a postgraduate student of an affiliated institution which is paying any applicable article publishing charge ("APC") for Open Access articles. Where the Submitting Author wishes to make the Work available on an Open Access basis (and intends to pay the relevant APC), the terms of reuse of such Open Access shall be governed by a Creative Commons licence – details of these licences and which [Creative Commons](#) licence will apply to this Work are set out in our licence referred to above.

Other than as permitted in any relevant BMJ Author's Self Archiving Policies, I confirm this Work has not been accepted for publication elsewhere, is not being considered for publication elsewhere and does not duplicate material already published. I confirm all authors consent to publication of this Work and authorise the granting of this licence.

1  
2  
3 1 **Determinants of childhood vaccination among children aged 12–23 months in Ethiopia: A**  
4  
5 2 **community-based cross-sectional study**  
6  
7

8  
9 3

10  
11 4 Sewunet Sako<sup>1\*</sup>, Girma Gilano<sup>1</sup> and Samuel Hailegebreal<sup>1</sup>  
12  
13

14  
15 5

16  
17 6 1. Department of Health Informatics, School of Public Health, College of Medicine and Health  
18  
19 Sciences, Arba Minch University, Arba Minch, Ethiopia  
20  
21

22  
23 8

24  
25 9 \* [zesew1lalem@gmail.com](mailto:zesew1lalem@gmail.com) – (SS)  
26  
27

28  
29 10

30  
31 11 P.O. Box 21  
32  
33

34  
35 12 Word count: 4276  
36  
37  
38  
39  
40  
41  
42  
43  
44  
45  
46  
47  
48  
49  
50  
51  
52  
53  
54  
55  
56  
57  
58  
59  
60

## 13 Abstract

14 **Objective:** Childhood vaccination is a cost-effective essential service to reach larger population  
15 globally. Due to unclear reasons, new emergence and resurgence of vaccine preventable diseases  
16 gets increase. Thus, the aim of this study is to identify prevalence and determinants of childhood  
17 vaccination in Ethiopia.

18 **Design:** Community based cross-sectional study

19 **Setting:** We used data from 2019 Ethiopia Mini Demographic and Health Survey (EMDHS). The  
20 survey included all the nine regional states and two city administrations of Ethiopia.

21 **Participants:** A weighted sample of 1,008 children 12-23 months of age was included in the  
22 analysis.

23 **Main outcome measures:** Multilevel proportional odds model was fitted to identify determinants  
24 of childhood vaccination status. In the final model, variables with p-value of less than 5% and an  
25 adjusted odds ratio with a 95% CI reported.

26 **Result:** The full childhood vaccination coverage of Ethiopia was 39.09% (95% CI: 36.06%,  
27 42.28). Mothers attended primary [AOR=2.16; 95% CI: 1.43-3.26], secondary [AOR=2.02; 95%  
28 CI: 1.07-3.79], and higher schools [AOR=2.67; 95% CI: 1.25-5.71], being in union [AOR=2.21;  
29 95% CI: 1.06-4.58], kept vaccination cards [AOR=26.18; 95% CI: 15.75-43.53], children received  
30 Vitamin A<sub>1</sub> [AOR=4.14; 95% CI: 2.9-5.9], living in Afar [AOR=0.14; 95% CI: 0.04-0.45], Somali  
31 [AOR=0.19; 95% CI: 0.06-0.60], Gambela [AOR=0.22; 95% CI: 0.06-0.77], Harari [AOR=0.14;  
32 95% CI: 0.04-0.52], Dire Dawa [AOR=0.23; 95% CI: 0.06-0.79] regions, and rural residents  
33 [AOR=0.53; 95% CI: 0.30-0.93] were factors significantly associated with childhood vaccination.

1  
2  
3 34 **Conclusion:** The coverage of full childhood vaccination in Ethiopia was low remained unchanged  
4  
5 35 since 2016. The study identified both the individual- and community-level factors affected the  
6  
7 36 vaccination status. Accordingly, public health intervention targeted to these identified factors can  
8  
9 37 increase childhood full vaccination status.  
10  
11  
12

13 38 **Keywords:** full vaccination; multilevel; ordinal, 12-23 months' children; Ethiopia  
14  
15

### 16 39 **Strengths and limitations of this study**

17  
18

- 19 40 • This study used most recent nationwide secondary data that shows proportion of EPI  
20  
21 41 coverage among children aged 12–23 months in Ethiopia.  
22
- 23 42 • We used multilevel proportional odds model to overcome the hierarchical nature of  
24  
25 43 EMDHS data and to identify both individual and community-level factors of EPI.  
26  
27 44 • This study did not include some important variables like psychosocial variables of parents,  
28  
29 45 vaccine hesitancy and other related variables since the study used secondary data of a  
30  
31 46 national survey.  
32  
33 47 • Establishing temporal relationship of causation between childhood vaccination and its  
34  
35 48 determinants was impossible due to the nature of the study design used for the survey.  
36  
37 49 • Recall bias is the most relevant limitation of the study.  
38  
39  
40  
41  
42  
43  
44  
45  
46  
47  
48  
49  
50  
51  
52  
53  
54  
55  
56  
57  
58  
59  
60

## 52 Introduction

53 According to the United Nations Children Fund (UNICEF), immunizations is a dynamic  
54 constituent of frontline health care to access larger populations. Compared to any other health or  
55 social activities, immunization reduces global annual death by significant proportion(1–4). It saves  
56 lives and protects people’s health, improves countries’ productivity and resilience, and helps to  
57 ensure a safer and healthier world(5,6).

58 According to the Ethiopian Ministry of Health, a child takes OPV<sub>0</sub> and BCG at Birth. At six weeks  
59 after birth, a child takes OPV1(oral polio vaccine), Pentavalent1(DPT+HepB+Hib),  
60 Pneumococcal1, and Rotavirus1. Then 10 weeks after birth the child takes OPV2, and  
61 Pentavalent2, Pneumococcal2, and Rota2. The child takes OPV3, Pentavalent3, Pneumococcal3,  
62 Inactivated polio vaccine (IPV) at 14<sup>th</sup> weeks. Other vaccines such as Measles Containing Vaccine  
63 (MCV1) at 9<sup>th</sup> month and MCV2 at 15<sup>th</sup> month and human papilloma virus (HPV) at 14<sup>th</sup> years for  
64 girls are given. However, this study only considers vaccines between 1 to 2 years. All vaccines are  
65 equally important(7). Currently, Ethiopia do not provide Rubella, Mumps and chickenpox  
66 vaccines to immunize children. Depending on the amount of immunity or protection after receiving  
67 a dose, a child may require more than one dose for some vaccine(8). Additionally, more than one  
68 dose is needed to build high enough immunity to prevent disease and boost immunity that fades  
69 over time(9). For vaccines that do not initiate full protection at first introduction, additional dose  
70 of vaccine usually repeated(10). However, this does not mean one vaccine is better than the other  
71 is or more important than another since it depends on the nature of the disease.

72 Globally, about 6.6 million children die every year and half of the deaths would have been  
73 prevented by vaccination(11). The global inequality in health care distribution force many low and  
74 middle income countries to live under the bundle of pestilent cumulative old health problems(12).

1  
2  
3 75 Africa is among the regions severely affected by globally imbalanced immunization resources  
4  
5 76 distribution. Vaccine preventable diseases become the big burden in war affected parts of the world  
6  
7 77 and underdeveloped countries like Ethiopia(13). Despite the existence of highly cost-effective  
8  
9 78 vaccines on global markets, situations such as war, displacements, under vaccination, and poor  
10  
11 79 access to vaccine contributes to the prevalence of vaccine preventable disease(14). The proportion  
12  
13 80 of the full immunization reflects how resources distribution caused the imbalance in childhood  
14  
15 81 vaccination(1,15).

16  
17  
18  
19  
20 82 Regardless of advancement and attainments of immunization, newly emerging vaccine preventable  
21  
22 83 diseases become still common in Africa(16). There are people who deprived of accessing  
23  
24 84 immunization in some countries and becoming the reason for the prevalence of vaccine  
25  
26 85 preventable diseases as admitted by World Health Organization (WHO) and other studies(17–19).  
27  
28 86 In Ethiopia a study has described that educated (30%) and rich (31%) people better vaccinate their  
29  
30 87 children(20).

31  
32  
33  
34 88 Some evidences indicated that global vaccine coverage is decreasing(21). A study summarized the  
35  
36 89 Demographic Health Surveys (DHS) of Sub-Saharan African countries showed that the full  
37  
38 90 vaccination coverage was 59.40% in 2021(22). In Mogadishu, full immunization was 45.2% and  
39  
40 91 41.4% in 2020 and 2021 respectively(22–24). In Togo, the full immunization coverage was 69.3%  
41  
42 92 in Lome district in 2019(25). In Ethiopia. the full immunization coverage is 76.81% in the  
43  
44 93 Southeast region(26); however, the pooled prevalence amongst 12–23 month old children in  
45  
46 94 Ethiopia is 47%(27). EMDHS 2019 demonstrated that coverage of full vaccination was 44(28)%.  
47  
48 95 The magnitude of full vaccination was increased from 14.3% in 2000 to 44% in 2019(29). From  
49  
50 96 this, we understand that the coverage of full vaccination is not adequate.  
51  
52  
53  
54  
55  
56  
57  
58  
59  
60



1  
2  
3 97 Many factors that support the argument of resource disparities as a reason for low coverage in  
4  
5 98 some countries. A systematic review conducted in Sub-Saharan African countries showed that lack  
6  
7  
8 99 of knowledge of immunization knowledge, distance to access point, financial deprivation, lack of  
9  
10 100 partners support, and distrust in vaccines and immunization programs were the barrier(30). The  
11  
12 101 absence of immunization card, respondents' sex, level of education, marital status, and  
13  
14 102 organization of health system are mentioned in another study(25). A study included many sub  
15  
16  
17 103 Saharan African countries showed that maternal education, health facility delivery, fathers  
18  
19 104 secondary education and above, ANC visits, PNC visit, wealth index, media exposure, and  
20  
21 105 distance to health facility affected the vaccination coverage(22). In Ethiopia, from previous four  
22  
23 106 EDHS, postnatal check-up, maternal awareness, regional difference (economic, education and life  
24  
25 107 style), educational status, residence, and women wealth index have been influenced  
26  
27 108 vaccination(20,27,31). From another study antenatal care visit, higher level of maternal education,  
28  
29 109 good knowledge of immunization, short distance to health facility, and institutional delivery were  
30  
31 110 the determinants of childhood immunization(32).

32  
33  
34  
35  
36 111 Different small scale and large scale (national level) studies have been done to identify the  
37  
38 112 determinants of childhood vaccination in the country. However, majority of the studies conducted  
39  
40 113 did not examined natural ordering of child's vaccination status as fully, partially, or not vaccinated  
41  
42 114 at all. Hence, we used multilevel proportional odds model which overcomes the hierarchal nature  
43  
44 115 of the DHS data and considers natural ordering of the outcome variable. In addition, the coverage  
45  
46 116 of full vaccination still remains far behind the national health sector transformation plan II of  
47  
48 117 Ethiopia (75% by 2024/25)(33), showing the need for further study. Therefore, this study aimed  
49  
50 118 determining prevalence of childhood vaccination coverage and its determinants to assist in policy  
51  
52 119 improvements.

## 120 **Methods**

### 121 **Study design**

122 This study used the 2019 cross-sectional data of Ethiopian mini demographic and health survey  
123 (EMDHS). We obtained the dataset from demographic and health survey website  
124 (<http://dhsprogram.com/data/>) after getting permission to access. The mini survey was conducted  
125 in March 2019 to June 2019 for the second time in Ethiopia. The Ethiopian Public Health Institute  
126 (EPHI) in collaboration with Central Statistical Agency (CSA) and Federal Ministry of Health  
127 (FMOH) implemented a nationally representative household survey.

### 128 **Study setting**

129 The EMDHS survey included all the nine regions and two city administrations of the country.  
130 Ethiopia is the second most populous country from Africa and located in the horn of Africa.

### 131 **Participants**

132 The 2019 EMDHS used the sampling frame created for the upcoming Ethiopia population and  
133 housing census list of 149,093 enumeration areas (EA). Participants of the study were selected  
134 through a stratified two-stage cluster sampling technique. Initially, they stratified each region in  
135 the country into urban and rural areas. Probability proportional to EA size was used to select 305  
136 EAs (93 in urban and 212 in rural areas). In the second stage, lists of households were used as a  
137 sampling frame to select 30 households per cluster by equal probability systematic selection  
138 technique. Eligible participants for the interview were all women aged 15-49 years and who were  
139 the residents of the selected households. Accordingly, 8,885 women were interviewed out of 9,012  
140 eligible women, giving a response rate of 98.6%. All living children age 12–23 months at the time

1  
2  
3 141 of the survey were the source population of the study. The details of the survey methods and  
4  
5 142 procedures are available in the 2019 EMDHS report (29).  
6  
7

### 8 143 **Eligibility criteria**

9  
10 144 All children born in the 2 years preceding the survey were included in the analysis. However,  
11  
12 145 children who were not alive at the time of the survey were excluded from this study. Accordingly,  
13  
14 146 data of 1,008 children who had born in the last 2 years and surviving were extracted from the 2019  
15  
16 147 EMDHS datasets for this analysis (Fig. 1).  
17  
18

### 19 148 **Measurements of variables of the Study**

#### 20 149 **Dependent variable**

21  
22  
23 150 Child vaccination status was the outcome variable of the study. We categorized the outcome  
24  
25 151 variable as not vaccinated, partially vaccinated and fully vaccinated.  
26  
27

28  
29 152 **Fully vaccinated:** is a child that has received one dose of Bacille Calmette-Guerin (BCG), three  
30  
31 153 doses of pentavalent, three doses of polio, two doses of Rota, three doses of pneumococcal  
32  
33 154 conjugate vaccine (PCV), and one dose of measles (MCV1).  
34  
35

36  
37 155 **Partially vaccinated:** is a child who had missed at least one or more of the thirteen vaccines/doses.  
38  
39

40 156 **Not vaccinated:** is a child that has not received any vaccine at all.  
41  
42

43 157 The interviewers of the 2019 EMDHS obtained information on vaccination coverage from written  
44  
45 158 vaccination cards (infant immunization card and other health cards), from mothers' verbal reports,  
46  
47 159 and from health facility records. They request mothers who born child in the three preceding years  
48  
49 160 of the survey to show the infant immunization card or health card. Subsequently, they copy the  
50  
51 161 dates of each vaccination given in the corresponding questionnaire. Similarly, they ask mother  
52  
53 162 who did not kept the cards to recall whether the child received that specific vaccination and the  
54  
55  
56  
57  
58  
59  
60

1  
2  
3 163 number of doses that the child received. In addition, to complement these data (information  
4  
5 164 collected based on the mother's recall) the field supervisor collects complementary vaccination  
6  
7 165 records from health facility for a child who visited a health facility and missed vaccination data.  
8  
9  
10 166 Finally, a Health Facility Questionnaire was used to record vaccination information for all children  
11  
12 167 without a vaccination card seen during the mother's interview; however, we dropped records with  
13  
14  
15 168 the missing data.

### 169 **Independent variables**

170 In this study, we considered both individual and community-level variables. The individual-level  
171 variables included are maternal age, maternal educational level, religion, marital status,  
172 relationship to household head, sex of the household head, wealth index, number of antenatal care  
173 (ANC) visits, place of delivery, utilized postnatal care, presence of vaccination document, birth  
174 order number, preceding birth interval, sex of child, vitamin A1, total children ever born, and  
175 number of under five children in household. Region, type of place of residence, community women  
176 education, community poverty, and community ANC utilization are community-level factors of  
177 the study. Region is a grouping of the first administrative level of Ethiopia. During the survey  
178 period, there were 9 regions and 2 city administrations in the country namely, Tigray, Amhara,  
179 Afar, Oromia, Somali, Benishangul-Gumuz, South nations nationalities and people's region  
180 (SNNPR), Gambela, Harari, and two city administrations (Addis Ababa and Dire Dawa).  
181 Moreover, community women education, community poverty and community ANC utilization  
182 were community-level variables derived by aggregating individual-level factors. They were  
183 categorized as "low" or "high" based on the median value since the EMDHS were not normally  
184 distributed.

1  
2  
3 185 Information regarding the wealth index is derived from data collected in the Household  
4  
5 186 Questionnaire. The questionnaire includes queries concerning the household's ownership of  
6  
7  
8 187 several consumer items such as television and car; dwelling characteristics such as flooring  
9  
10 188 material; type of drinking water source; toilet facilities; and other characteristics related to wealth  
11  
12 189 status. Each household asset for which information is collected is assigned a weight or factor score  
13  
14 190 generated through principal components analysis (PCA). The resulting asset scores are  
15  
16 191 standardized about a standard normal distribution with a mean of zero and a standard deviation of  
17  
18 192 one. These standardized scores then used to create the breakpoints that define wealth quintiles as  
19  
20 193 Lowest, Second, Middle, Fourth, and Highest(34). Here, we further categorized the wealth index  
21  
22 194 into poor (lowest plus poor), average (middle), and rich (rich plus highest).  
23  
24  
25  
26

### 27 195 **Data processing and statistical analysis**

28  
29 196 The data were cleaned, re-coded and analyzed using STATA/SE version 14.0. We used numbers,  
30  
31 197 mean, percentage or proportions to describe both the individual- and community-level variables.  
32  
33 198 We used sample weight to manage sampling errors and non-responses. The hierarchical nature of  
34  
35 199 the DHS data (DHS sampling methods) violates the assumption of independence or lack of  
36  
37 200 correlation of the residuals. In the DHS survey, observations are interdependent as participants  
38  
39 201 nested in the same cluster may behave in the same way and differ to other clusters in terms of the  
40  
41 202 outcome of interest. consequently, we used a two-level multilevel proportional odds model, as  
42  
43 203 single-level traditional statistical model might not be adequate to control for the clustering effect.  
44  
45 204 Moreover, we used multilevel proportional odds model to consider the natural ordering of the  
46  
47 205 response variable (not vaccinated, partially vaccinated and fully vaccinated). Accordingly, we built  
48  
49 206 four consecutive models to identify determinants of child vaccination in Ethiopia. We first fitted  
50  
51 207 the null model or the intercept only model. Then, model 1 was fitted with the individual-level  
52  
53  
54  
55  
56  
57  
58  
59  
60

1  
2  
3 208 variables. Similarly, we fitted model 2 (with community-level factors). Finally, model 3 or the  
4  
5 209 mixed-effects model was fitted with both individual- and community-level factors. The intra-class  
6  
7 210 correlation coefficient (ICC) was used to determine the clustering effect or community variation  
8  
9  
10 211 and it was calculated using the following formula.

11  
12  
13 212 
$$\text{ICC} = \frac{V_A}{V_A + \frac{\pi^2}{3}}$$

14  
15  
16  
17 213 Where:  $V_A$  is community level variance and  $\frac{\pi^2}{3} = 3.29$  is individual level variance. On the other  
18  
19  
20 214 hand, we checked Proportional Change in Variance (PCV), Median Odds Ratio (MOR), and  
21  
22  
23 215 Deviance by using the following formulas to determine the fitness of the model.  $\text{PCV} = \frac{V_0 - V_i}{V_0}$ .

24  
25  
26 216 Where:  $V_0$  is a variance in the null model and  $V_i$  is a variance in the consecutive models.  $\text{MOR} =$   
27  
28 217  $e^{0.95V_i}$  where:  $V_i$  indicates that cluster variance. The last model showed the lowest deviance  
29  
30  
31 218 (Model III) and become the best-fitted model. Furthermore, we examined the proportional odds  
32  
33 219 assumption that assume the equal effect of each factor across the outcome categories by score test.  
34  
35 220 We checked Variance Inflation Factor (VIF) and found 1.60 to assess the presence of  
36  
37 221 multicollinearity. The finding is in the acceptable range. In bi-variable analysis, we kept variables  
38  
39 222 with p-value less than 0.25 for the multivariable multilevel proportional odds analysis. Finally, in  
40  
41  
42 223 the multivariable analysis, we reported variables with p-value less than 5%, adjusted proportional  
43  
44 224 odds ratio (APOR) and 95% confidence interval.

## 45 46 47 225 **Patient and public involvement**

48  
49  
50 226 Patients and/or the public were not involved in the design, or conduct, or reporting, or  
51  
52  
53 227 dissemination plans of this research.

## 54 55 228 **Result**

229 **Socio-demographic characteristics of mothers and children**

230 The current study included 1,008 mothers who have children aged 12-23 months. Out of the total  
 231 respondents, more than half (52.78%) were in the age range of 25-34 years, nearly half (48.91%)  
 232 have not attended education, and almost one-third (32.14%) were Orthodox religion followers.  
 233 Four out of ten mothers (39.98%) were from high income households and the majorities (94.05%)  
 234 were currently in union (Table 1).

235 **Table 1: Socio-demographic characteristics of mothers of children aged 12-23 months in**  
 236 **Ethiopia, 2019 (n=1008)**

| Variables                 | Frequency (n) | Percentage (%) |
|---------------------------|---------------|----------------|
| <b>Maternal age</b>       |               |                |
| 15-24                     | 298           | 29.56          |
| 25-34                     | 532           | 52.78          |
| 35-49                     | 178           | 17.66          |
| <b>Maternal education</b> |               |                |
| No education              | 493           | 48.91          |
| Primary                   | 342           | 33.93          |
| Secondary                 | 99            | 9.82           |
| Higher                    | 74            | 7.34           |
| <b>Marital status</b>     |               |                |
| Not in union              | 60            | 5.95           |
| In union                  | 948           | 94.05          |
| <b>Religion</b>           |               |                |

|                                   |     |       |
|-----------------------------------|-----|-------|
| <b>Orthodox</b>                   | 324 | 32.14 |
| <b>Protestant</b>                 | 177 | 17.56 |
| <b>Muslim</b>                     | 481 | 47.72 |
| <b>Others</b>                     | 26  | 2.58  |
| <b>Wealth index</b>               |     |       |
| <b>Poor</b>                       | 469 | 46.53 |
| <b>Middle</b>                     | 136 | 13.49 |
| <b>Rich</b>                       | 403 | 39.98 |
| <b>Region</b>                     |     |       |
| <b>Tigray</b>                     | 93  | 9.23  |
| <b>Amhara</b>                     | 111 | 11.01 |
| <b>Afar</b>                       | 99  | 9.82  |
| <b>Oromia</b>                     | 127 | 12.60 |
| <b>Somali</b>                     | 85  | 8.43  |
| <b>Benishabgul</b>                | 83  | 8.23  |
| <b>SNNPR</b>                      | 116 | 11.51 |
| <b>Gambela</b>                    | 77  | 7.64  |
| <b>Harari</b>                     | 73  | 7.24  |
| <b>Addis Ababa</b>                | 64  | 6.35  |
| <b>Dire Dawa</b>                  | 80  | 7.94  |
| <b>Type of place of residence</b> |     |       |
| <b>Urban</b>                      | 267 | 26.49 |
| <b>Rural</b>                      | 741 | 73.51 |



---

**Community women education**


---

|            |     |       |
|------------|-----|-------|
| <b>Low</b> | 468 | 46.43 |
|------------|-----|-------|

|             |     |       |
|-------------|-----|-------|
| <b>High</b> | 540 | 53.57 |
|-------------|-----|-------|

---

**Community poverty**


---

|            |     |       |
|------------|-----|-------|
| <b>Low</b> | 495 | 49.11 |
|------------|-----|-------|

|             |     |       |
|-------------|-----|-------|
| <b>High</b> | 513 | 50.89 |
|-------------|-----|-------|

---

**Community ANC utilization**


---

|            |     |       |
|------------|-----|-------|
| <b>Low</b> | 468 | 46.43 |
|------------|-----|-------|

|             |     |       |
|-------------|-----|-------|
| <b>High</b> | 540 | 53.57 |
|-------------|-----|-------|

---

237

**238 Healthcare service utilization related characteristics of mothers**

239 Among the participants, less than half (44.15%) were practiced home delivery, nearly a quarter  
 240 (24.31%) had no ANC visit, and almost one-tenth (13.99%) received PNC service. Majority of the  
 241 mothers (71.73%) kept immunization document and 88.1% of the interviewed mothers have less  
 242 than or equal to two under five children in their households. From the total number of children,  
 243 half (50.30%) were males, 22.72% were first-born, and 59.33% were received the most recent  
 244 vitamin A1. Three-fourth of respondents (73.51%) was from rural areas and 12.6% were from  
 245 Oromia region of the country (Table 2).

246 **Table 2: Healthcare service utilization related characteristics of mothers with children aged**  
 247 **12–23 months in Ethiopia, 2019 (n=1008)**

---

**Number of ANC visits**


---

|             |     |       |
|-------------|-----|-------|
| <b>None</b> | 245 | 24.31 |
|-------------|-----|-------|

---

|                                         |     |       |
|-----------------------------------------|-----|-------|
| <b>1-3 times</b>                        | 313 | 31.05 |
| <b>4 and above</b>                      | 450 | 44.64 |
| <b>Place of delivery</b>                |     |       |
| <b>Home</b>                             | 445 | 44.15 |
| <b>Health facility</b>                  | 563 | 55.85 |
| <b>PNC service</b>                      |     |       |
| <b>No</b>                               | 836 | 86.01 |
| <b>Yes</b>                              | 136 | 13.99 |
| <b>Sex of child</b>                     |     |       |
| <b>Male</b>                             | 507 | 50.30 |
| <b>Female</b>                           | 501 | 49.70 |
| <b>Birth order number</b>               |     |       |
| <b>1<sup>st</sup> born</b>              | 229 | 22.72 |
| <b>2<sup>nd</sup> to 3<sup>rd</sup></b> | 372 | 36.90 |
| <b>4<sup>th</sup> to 5<sup>th</sup></b> | 204 | 20.24 |
| <b>6<sup>th</sup> and above</b>         | 203 | 20.14 |
| <b>Presence of vaccination document</b> |     |       |
| <b>No</b>                               | 285 | 28.27 |
| <b>Yes</b>                              | 723 | 71.73 |
| <b>Preceding birth order</b>            |     |       |
| <b>&lt; 24 months</b>                   | 186 | 18.45 |
| <b>24-48</b>                            | 357 | 35.42 |
| <b>48 and above</b>                     | 465 | 46.13 |

---

**Received Vitamin A1**


---

|           |     |       |
|-----------|-----|-------|
| <b>No</b> | 410 | 40.67 |
|-----------|-----|-------|

---

|            |     |       |
|------------|-----|-------|
| <b>Yes</b> | 598 | 59.33 |
|------------|-----|-------|

---

**Total children ever born**


---

|                     |     |       |
|---------------------|-----|-------|
| <b>1-3 children</b> | 598 | 59.33 |
|---------------------|-----|-------|

---

|                     |     |       |
|---------------------|-----|-------|
| <b>4-6 children</b> | 278 | 27.58 |
|---------------------|-----|-------|

---

|                    |     |       |
|--------------------|-----|-------|
| <b>7 and above</b> | 132 | 13.10 |
|--------------------|-----|-------|

---

**Number of <5 children in household**


---

|          |     |       |
|----------|-----|-------|
| $\leq 2$ | 888 | 88.10 |
|----------|-----|-------|

---

|       |     |       |
|-------|-----|-------|
| $> 2$ | 120 | 11.90 |
|-------|-----|-------|

---

248

**Childhood vaccination status in Ethiopia**

250 The full vaccination coverage among children aged 12-23 months in Ethiopia was 39.09% (95%  
 251 CI: 36.06%, 42.28) (Fig. 2). On the other hand, two in ten children (22.32%) of 12-23 months' age  
 252 have not received any vaccination in three years before the 2019 survey period. Among the  
 253 children of 12-23 months' age included in the study, 70.24% received BCG, 57.84% received the  
 254 third dose of pentavalent, 55.75% received the third dose of polio, 60.62% received the second  
 255 dose of rotavirus vaccine, 55.16% received the third dose of PCV, and 57.04% received the first  
 256 dose of measles vaccination (Fig. 3).

**Factors affecting child vaccination in Ethiopia**
**The fixed effect analysis result**

259 The multivariable analysis showed that maternal educational level of mothers, maternal age,  
 260 marital status, presence of vaccination document, received Vitamin A<sub>1</sub>, region, and place of  
 261 residence, were significantly associated with childhood vaccination. Children whose mothers  
 262 attended primary, secondary, and higher education have 2.2 [AOR=2.16; 95% CI: 1.43-3.26], 2  
 263 [AOR=2.02; 95% CI: 1.07-3.79], and 2.7 [AOR=2.67; 95% CI: 1.25-5.71] times higher partial or  
 264 full vaccination respectively compared to born to mothers with no education. The odds of partial  
 265 or full vaccination was 1.8 [AOR=1.79; 95% CI: 1.08-2.99] times higher among children whose  
 266 mothers are in the age range of 35-49 compared to 15-19 age group. Mothers who are currently in  
 267 union have 2.2 [AOR=2.21; 95% CI: 1.06-4.58] times more likely to vaccinate their children either  
 268 partially or fully. keeping vaccination cards was 26 [AOR=26.18; 95% CI: 15.75-43.53] times  
 269 more likely associated with partial or full vaccination compared to not keeping vaccination cards.  
 270 Children who have received Vitamin A<sub>1</sub> have higher likelihood of partial or full vaccination  
 271 [AOR=4.14; 95% CI: 2.9-5.9]. Children from Afar [AOR=0.14; 95% CI: 0.04-0.45], Somali  
 272 [AOR=0.19; 95% CI: 0.06-0.60], Gambela [AOR=0.22; 95% CI: 0.06-0.77], Harari [AOR=0.14;  
 273 95% CI: 0.04-0.52], and Dire Dawa [AOR=0.23; 95% CI: 0.06-0.79] regions have less partial or  
 274 full vaccination compared to the Tigray region children. Children living in rural areas have 47%  
 275 [AOR=0.53; 95% CI: 0.30-0.93] reduced partial or full vaccination than children living in urban  
 276 areas of the country (Table 3).

277 **Table 3: Multivariable multilevel ordinal logistic regression analysis of individual and**  
 278 **community-level determinants of child vaccination in Ethiopia, 2019**

|           | Null  | Model I      | Model II     | Model III    |
|-----------|-------|--------------|--------------|--------------|
| Variables | Model | AOR (95% CI) | AOR (95% CI) | AOR (95% CI) |

|    |                                       |                         |                         |
|----|---------------------------------------|-------------------------|-------------------------|
| 1  |                                       |                         |                         |
| 2  |                                       |                         |                         |
| 3  | <b>Maternal educational level</b>     |                         |                         |
| 4  |                                       |                         |                         |
| 5  | <b>No education</b>                   | 1                       | 1                       |
| 6  |                                       |                         |                         |
| 7  | <b>Primary</b>                        | 1.97 (1.33, 2.93)**     | 2.16 (1.43, 3.26)***    |
| 8  |                                       |                         |                         |
| 9  | <b>Secondary</b>                      | 1.80 (0.97, 3.33)       | 2.02 (1.07, 3.79)*      |
| 10 |                                       |                         |                         |
| 11 | <b>Higher</b>                         | 2.85 (1.35, 6.02)       | 2.67 (1.25, 5.71)*      |
| 12 |                                       |                         |                         |
| 13 |                                       |                         |                         |
| 14 |                                       |                         |                         |
| 15 | <b>Maternal age</b>                   |                         |                         |
| 16 |                                       |                         |                         |
| 17 | <b>15-24</b>                          | 1                       | 1                       |
| 18 |                                       |                         |                         |
| 19 | <b>25-34</b>                          | 1.13 (0.78, 1.63)       | 1.15 (0.79, 1.66)       |
| 20 |                                       |                         |                         |
| 21 | <b>35-49</b>                          | 1.81 (1.09, 3.02)*      | 1.79 (1.08, 2.99)*      |
| 22 |                                       |                         |                         |
| 23 |                                       |                         |                         |
| 24 | <b>Religion</b>                       |                         |                         |
| 25 |                                       |                         |                         |
| 26 | <b>Orthodox</b>                       | 1                       | 1                       |
| 27 |                                       |                         |                         |
| 28 | <b>Protestant</b>                     | 0.46 (0.27, 0.77)**     | 0.69 (0.36, 1.30)       |
| 29 |                                       |                         |                         |
| 30 | <b>Muslim</b>                         | 0.71 (0.47, 1.09)       | 1.28 (0.73, 2.24)       |
| 31 |                                       |                         |                         |
| 32 | <b>Other</b>                          | 0.39 (0.14, 1.22)       | 0.56 (0.18, 1.68)       |
| 33 |                                       |                         |                         |
| 34 |                                       |                         |                         |
| 35 |                                       |                         |                         |
| 36 | <b>Marital status</b>                 |                         |                         |
| 37 |                                       |                         |                         |
| 38 | <b>Not in union</b>                   | 1                       | 1                       |
| 39 |                                       |                         |                         |
| 40 | <b>In union</b>                       | 1.84 (0.89, 3.80)       | 2.21 (1.06, 4.58)*      |
| 41 |                                       |                         |                         |
| 42 |                                       |                         |                         |
| 43 | <b>Immunization document</b>          |                         |                         |
| 44 |                                       |                         |                         |
| 45 | <b>Available</b>                      | 1                       | 1                       |
| 46 |                                       |                         |                         |
| 47 | <b>Not available</b>                  | 27.32 (16.44, 45.41)*** | 26.18 (15.75, 43.53)*** |
| 48 |                                       |                         |                         |
| 49 |                                       |                         |                         |
| 50 | <b>Received Vitamin A<sub>1</sub></b> |                         |                         |
| 51 |                                       |                         |                         |
| 52 | <b>No</b>                             | 1                       | 1                       |
| 53 |                                       |                         |                         |
| 54 | <b>Yes</b>                            | 4.32 (3.04, 6.15)***    | 4.14 (2.9, 5.9)***      |
| 55 |                                       |                         |                         |
| 56 |                                       |                         |                         |
| 57 |                                       |                         |                         |
| 58 |                                       |                         |                         |
| 59 |                                       |                         |                         |
| 60 |                                       |                         |                         |

1  
2  
3  
4  
5  
6  
7  
8  
9  
10  
11  
12  
13  
14  
15  
16  
17  
18  
19  
20  
21  
22  
23  
24  
25  
26  
27  
28  
29  
30

| Region |                    |                      |                     |
|--------|--------------------|----------------------|---------------------|
|        | <b>Tigray</b>      | 1                    | 1                   |
|        | <b>Afar</b>        | 0.08 (0.03, 0.23)*** | 0.14 (0.04, 0.45)** |
|        | <b>Amhara</b>      | 0.59 (0.24, 1.48)    | 0.5 (0.22, 1.13)    |
|        | <b>Oromia</b>      | 0.21 (0.09, 0.48)*** | 0.45 (0.18, 1.09)   |
|        | <b>Somali</b>      | 0.08 (0.03, 0.22)*** | 0.19 (0.06, 0.60)** |
|        | <b>Benishangul</b> | 1.13 (0.37, 3.40)    | 0.74 (0.25, 2.22)   |
|        | <b>SNNPR</b>       | 0.19 (0.08, 0.45)*** | 0.48 (0.19, 1.17)   |
|        | <b>Gambella</b>    | 0.38 (0.12, 1.22)    | 0.22 (0.06, 0.77)*  |
|        | <b>Harari</b>      | 0.43 (0.12, 1.48)    | 0.14 (0.04, 0.52)** |
|        | <b>Addis Ababa</b> | 1.27 (0.39, 4.14)    | 1.14 (0.37, 3.47)   |
|        | <b>Dire Dawa</b>   | 0.78 (0.23, 2.62)    | 0.23 (0.06, 0.79)*  |

## 31 Type of place of residence

32  
33  
34  
35  
36  
37

|  |              |                      |                    |
|--|--------------|----------------------|--------------------|
|  | <b>Urban</b> | 1                    | 1                  |
|  | <b>Rural</b> | 0.25 (0.14, 0.44)*** | 0.53 (0.30, 0.93)* |

## 38 Community women

39

## 40 education

41  
42  
43  
44  
45  
46

|  |             |                   |                    |
|--|-------------|-------------------|--------------------|
|  | <b>Low</b>  | 1.04 (0.56, 1.94) | 0.75 (0.51, 1.10)* |
|  | <b>High</b> |                   |                    |

47 279 Key \* =  $p < 0.05$ , \* =  $p < 0.01$ , \* =  $p < 0.001$ 

48

49

## 50 280 The random effect analysis result

51

52

53 281 Table 3 presents the random effect analysis result of childhood vaccination status in Ethiopia. The

54

55 282 appropriateness of application of multilevel analysis and the presence of significant variations of

56

57

58

59

60

283 childhood vaccination status between clusters (the clustering effect) was justified by the ICC of  
 284 Null model (48.19%). The value of ICC decreased from 48.19% in the null model to 14.55% in  
 285 the final model showing how the effect of clustering changed. In addition, as depicted in the table  
 286 below the largest PCV of the final model (81.70%) indicates the goodness of model fitness. The  
 287 final model (Model 3) has the highest capacity than model I or model II alone to explain the  
 288 variations in childhood vaccination status. On top of that, Model III is the best explanatory model  
 289 to show the variation in the childhood vaccination. The deviance observed in the final model was  
 290 smaller than that of other models (Table 4).

291 **Table 4: Random effects analysis and model fit statistics of child vaccination in Ethiopia,**  
 292 **2019**

| Parameters                    | Null Model | Model I  | Model II | Model III |
|-------------------------------|------------|----------|----------|-----------|
| Community level Variance (SE) | 3.06       | 0.76     | 1.21     | 0.56      |
| PCV (%)                       | Reference  | 75.16%   | 60.46%   | 81.70%    |
| ICC (%)                       | 48.19%     | 18.77%   | 26.89%   | 14.55%    |
| MOR                           | 5.31       | 2.29     | 2.84     | 2.03      |
| Log-likelihood                | -988.74    | -684.36  | -919.88  | -667.78   |
| Deviance                      | 1,977.48   | 1,368.72 | 1,839.76 | 1,335.56  |
| AIC                           | 1983.49    | 1418.72  | 1873.77  | 1413.56   |
| BIC                           | 1998.24    | 1540.70  | 1957.34  | 1603.86   |

## 293 Discussion

294 In Ethiopia, full vaccination was 39.08%. Compared to other studies in the country, it is less than  
 295 that of South East Ethiopia 76.8%(26), country-level pooled prevalence (47%)(27), and 67% in

2016 from other study(35). It is also less than 59.40% Sub-Saharan vaccination coverage(22), 69.21% East Africa(35), 45.2% Mogadishu (23), and 69.3% in Togo coverage(25). It is in the same confidence intervals as 38.3% of 2016 EDHS. This indicates that the current prevalence of full vaccination was unchanged since 2016. The reasons might be the political instabilities in the country for the last five years. Dropout rate (18.8%) may also negatively affected childhood vaccination coverage of the country. The inequalities to access health services regardless of increased population in those years might be another reason. Lack of maternal education (48.91%) also affected vaccination coverage undesirably; however, it was 67% in 2015(31). It is also better than the Sub-Saharan African countries average(22). This shows that although there are some improvements, the deviation from standard is big. Only 39.98% of mothers were from higher income families. The finding is consistent with 36.6% coverage from other study(31).

Among the associated factors, maternal education had positive association with higher full or partial vaccination, which is also similar to findings from other studies(22,31,36). The consistence might indicate that education is an independent predictor of full or partial Ffivaccination, which needs focused attention. Increased maternal age puts mothers in the higher level of full immunization category. Other studies also showed that higher age has association with full immunization(3,22). This might indicate that maternal maturity is an important factor for higher childhood vaccination in contrast to the early marriage. This means child bearing at younger age, and age at first birth needs adequate attention. Children whose mothers remained in union had higher tendency to be in higher category of full vaccination. From previous studies, there are consistent findings(22,23). This might be an indication that disrupted families might endanger children's life and so that family union should be promoted. Mothers who keep evidence of vaccination tend to be in higher category of vaccination coverage. This is also true for some



1  
2  
3 319 studies(23,24,31). This means, women who keeps children evidence of vaccination might have  
4  
5 320 indeed great regards for full immunization while carelessness might start from poor evidence  
6  
7 321 keeping. Children who received Vitamin A<sub>1</sub> had higher chance of being vaccination category. The  
8  
9  
10 322 fact that vitamin A is schedule towards the end of most immunization program might raise to this  
11  
12 323 association (19). This might be another persist issue we never eased in previous efforts as per  
13  
14 324 evidence from this study and could be set as an objective to attain other sub-objectives. Ethiopia  
15  
16 325 further classified in city administrations, agrarian, and pastoralist regions. Pastoralists regions such  
17  
18 326 as Afar and Somali and semi pastoralist regions such as Gambela, Benishangul Gumuz and Harari  
19  
20 327 had higher tendency of failing into low category of full immunization. This is also reported by  
21  
22 328 other studies (31). This is also confirmed by other studies that compared developed and  
23  
24 329 underdeveloped regions in Ethiopia(31,36). This apparently shows that attention deprived regions  
25  
26 330 should be the next intervention areas. This problem is relatively similar between the rural and  
27  
28 331 urban place of residences. Other studies also laud that inequalities between rural and urban  
29  
30 332 residence need careful considerations(20). This might be apparently due to access, awareness, and  
31  
32 333 availability of resources.

33  
34  
35  
36  
37  
38 334 Besides the positive information, this study has also some limitations such as missing data in some  
39  
40 335 records, the disproportion of sample in each region, secondary source data, and time-lapse between  
41  
42 336 data collection and this analysis. When observable evidence of vaccination is not available, data  
43  
44 337 collectors asked mothers orally and that may cause some recall and social desirability bias.  
45  
46 338 However, a Health Facility Questionnaire was used to record vaccination information for all  
47  
48 339 children without a vaccination card seen during the mother's interview(34). Moreover, we are  
49  
50 340 unable to include some relevant variables like psychosocial variables of parents, vaccine hesitancy  
51  
52 341 and other related variables since this study used a secondary data of a national survey. The authors  
53  
54  
55  
56  
57  
58  
59  
60

1  
2  
3 342 followed international protocols of DHS data process and analyses, weighted data, carefully  
4  
5 343 interpreted finding within the period, and included complete records.  
6  
7

## 8 344 **Conclusion**

9  
10  
11 345 Although full vaccination increased from EDHS 2000 to 2016, the current analysis of EMDHS  
12  
13 346 2019 result showed that it was remained unchanged. Our analysis identified many factors that  
14  
15 347 might be contributed for the absence of changes. Maternal educational level, maternal age, marital  
16  
17 348 status, presence of vaccination document, received Vitamin A<sub>1</sub>, region, and place of residence,  
18  
19 349 were some of the contributors. Analyzing associated factors showed some of the factors are old  
20  
21 350 enough causing the problem for decades. Even though the political situation in the country might  
22  
23 351 also contributed to the persistency of these factors, it is advisable to work on accessibility,  
24  
25 352 awareness, and available are vital. Maternal education and poverty especially family and maternal  
26  
27 353 capacity remained critical and need all round efforts such as further government commitment,  
28  
29 354 dedicated international supports, and peace and security can override the problem.  
30  
31  
32  
33

34  
35 355 **Abbreviation/Acronyms:** Demographic Health Survey (DHS); Ethiopian Demographic Health  
36  
37 356 Survey (EDHS); Ethiopian Mini-Demographic Health Survey( EMDHS); World Health  
38  
39 357 Organization (WHO); United Nations Children’s Fund (UNICEF); Adjusted Odds Ratio (AOR);  
40  
41 358 Antenatal Care (ANC); Postnatal Care (PNC); Pneumococcal Conjugate Vaccine (PCV); and  
42  
43 359 Measles Containing Vaccine (MCV); Bacille Calmette-Guerin (BCG); South Nations  
44  
45 360 Nationalities and Peoples Region (SNNPR); Intra-class Correlation Coefficient (ICC); Median  
46  
47 361 Odds Ratio (MOR), Confidence Interval (CI)  
48  
49  
50  
51

## 52 362 **Declarations**

## 53 54 363 **Ethics approval and consent to participate**

1  
2  
3 364 This study used secondary data from demographic and health survey data files. Initially, the  
4  
5 365 MEASURE DHS team was formally requested to access the datasets by completing the online  
6  
7  
8 366 request form on their website ([www.dhsprogram.com](http://www.dhsprogram.com)). Accordingly, permission to access the data  
9  
10 367 and the letter of authorization was obtained from ICF international. Therefore, for this study  
11  
12 368 consent to participate is not applicable. We kept all data confidential, and no effort was made to  
13  
14 369 identify households or individuals. The Ethiopian Health Nutrition and Research Institute  
15  
16 370 (EHNRI) Review Board and the National Research Ethics Review Committee (NRERC) at the  
17  
18 371 Ministry of Science and Technology of Ethiopia, approved EMDHS 2019. The authors also  
19  
20 372 confirm that all methods were carried out in accordance with relevant guidelines and regulations.  
21  
22  
23

### 24 373 **Consent for publication**

25  
26 374 Not applicable

### 27 28 375 **Availability of data and materials**

29  
30 376 The survey dataset used in this analysis are third party data from the demographic and health  
31  
32 377 survey website ([www.dhsprogram.com](http://www.dhsprogram.com)) and permission to access the data is granted only for  
33  
34 378 registered DHS data user.  
35  
36  
37  
38

### 39 379 **Competing interests**

40  
41 380 The authors have declared that no competing interest existed.  
42  
43

### 44 381 **Funding**

45  
46 382 The authors received no specific funding for this work.  
47  
48

### 49 383 **Authors' contribution**

50  
51 384 SS has obtained and analyzed the EMDHS data. SS, GG, SH were equally involved in the  
52  
53 385 conception of the study, interpreted the results, drafted and critically revised the manuscript. All  
54  
55 386 authors have read and approved the final version of the manuscript.  
56  
57  
58  
59  
60

1  
2  
3 **387 Acknowledgments**  
4

5 **388** The authors are grateful to Measure DHS, ICF International Rockville, Maryland, USA for  
6  
7  
8 **389** allowing us to use the 2019 EMDHS data.  
9  
10  
11  
12  
13  
14  
15  
16  
17  
18  
19  
20  
21  
22  
23  
24  
25  
26  
27  
28  
29  
30  
31  
32  
33  
34  
35  
36  
37  
38  
39  
40  
41  
42  
43  
44  
45  
46  
47  
48  
49  
50  
51  
52  
53  
54  
55  
56  
57  
58  
59  
60

391 **References**

- 392 1. WHO vaccine-preventable diseases : monitoring system . 2020 global summary.  
393 2022;2020:2–3.
- 394 2. Chepkurui V, Amponsah-dacosta E, Haddison EC. Characterization of National  
395 Immunization Programs in the Context of Public Health Emergencies : A Case Study of  
396 13 Countries in the WHO Africa Region. *Front public Heal*. 2021;9(September):1–12.
- 397 3. South Africa : WHO and UNICEF estimates of immunization coverage : 2016 revision  
398 South Africa : WHO and UNICEF estimates of immunization coverage : 2016 revision.  
399 2018;1–18.
- 400 4. WHO. Immunization coverage. 2022;(July 2021):3–7.
- 401 5. Patel MK, Goodson JL, Alexander JP Jr., et al. Progress Toward Regional Measles  
402 Elimination — Worldwide, 2000–2019. *MMWR Morb Mortal Wkly Rep* 2020;69:1700–  
403 1705. Poliomyelitis. World Health Organization; 2019.
- 404 6. World Health Organization [WHO]. Counting the impact of vaccines. 2021;(April):2017–  
405 9.
- 406 7. FMOH. Expanded Program on Immunization (EPI). 2022. p. 1–4.
- 407 8. Klein S. Why Some Vaccines Require More Than One Dose. 2015. p. 1–3.
- 408 9. WHO. Why Immunizing Children Matters. 2017. p. 1–3.
- 409 10. Children’s hospital of Philadelphia. Did You Know: Some Reasons Vaccines Are Given  
410 in Multiple Doses. 2014.

- 1  
2  
3 411 11. Greenwood B. 2014 The contribution of vaccination to global health: past, present and  
4  
5 412 future. *Phil. Trans. R. Soc. B.* 2014; 369: 20130433.  
6  
7 413 <http://dx.doi.org/10.1098/rstb.2013.0433>.  
8  
9  
10 414 12. Rodrigues CMC, Plotkin SA. Impact of Vaccines; Health, Economic and Social  
11  
12 415 Perspectives. *Front Microbiol.* 2020;11(July).  
13  
14  
15 416 13. Ghendon Y. Vaccine preventable viral diseases in developing countries. *World J*  
16  
17 417 *Microbiol Biotechnol.* 1991 Mar;7(2):115-20. doi: 10.1007/BF00328980. PMID:  
18  
19 418 24424922.  
20  
21  
22 419 14. Brenzel L, Wolfson LJ, Fox-Rushby J, et al. Vaccine-preventable Diseases. In: Jamison  
23  
24 420 DT, Breman JG, Measham AR, et al., editors. *Disease Control Priorities in Developing*  
25  
26 421 *Countries.* 2nd edition. Washington (DC): The International Bank for Reconstruction a.  
27  
28  
29 422 15. Ethiopia : WHO and UNICEF estimates of immunization coverage : 2019 revision  
30  
31 423 Ethiopia : WHO and UNICEF estimates of immunization coverage : 2019 revision.  
32  
33 424 2021;1–28.  
34  
35  
36 425 16. WHO. Immunization WHO Regional Office for Africa. :199–207. Available from:  
37  
38 426 <https://www.afro.who.int/health-topics/immunization>  
39  
40  
41 427 17. WHO. Organisation Mondiale Vaccine-Preventable Diseases And Immunization. 2021;71.  
42  
43  
44 428 18. Raslan R, El Sayegh S, Chams S, Chams N, Leone A, Hajj Hussein I. Re-Emerging  
45  
46 429 Vaccine-Preventable Diseases in War-Affected Peoples of the Eastern Mediterranean  
47  
48 430 Region—An Update. *Front Public Heal.* 2017;5(October):1–8.  
49  
50  
51 431 19. WHO. Global Immunization News (GIN). 2017;(January).  
52  
53  
54  
55  
56  
57  
58  
59  
60

- 1  
2  
3 432 20. Shibre G, Zegeye B, Idriss-wheeler D, Yaya S. Inequalities in measles immunization  
4  
5 433 coverage in Ethiopia : a cross-sectional analysis of demographic and health surveys 2000  
6  
7 434 – 2016. *BMC Infect Dis.* 2020;20:1–12.  
9  
10  
11 435 21. Figueiredo A De, Were F. Local trends in immunisation coverage across Africa. *Lancet.*  
12  
13 436 2019;393(10183):1779–81.  
14  
15  
16 437 22. Fenta SM, Biresaw HB, Fentaw KD. Determinants of full childhood immunization among  
17  
18 438 children aged 12 – 23 months in sub-Saharan Africa : a multilevel analysis using  
19  
20 439 Demographic and Health Survey Data. *Trop Med Health.* 2021;49:29.  
22  
23  
24 440 23. Mohamud MHT, Magan MA, Mohamed LM, Mohamud MA, Muse AA. Barriers for full  
25  
26 441 immunization coverage among under 5 years children in Mogadishu , Somalia. *J Fam*  
27  
28 442 *Med Prim Care.* 2020;9(6):2664–9.  
29  
30  
31 443 24. Yadita ZS, Ayehubizu LM (2021) Full immunization coverage and associated factors  
32  
33 444 among children aged 12–23 months in Somali Region, Eastern Ethiopia. *PLoS ONE.*2021  
34  
35 445 16(12): e0260258. <https://doi.org/10.1371/journal.pone.0260258>.  
36  
37  
38  
39 446 25. Zida-Compaore WIC, Ekouevi DK, Gbeasor-Komlanvi FA, Sewu EK, Blatome T,  
40  
41 447 Gbadoe AD, et al. Immunization coverage and factors associated with incomplete  
42  
43 448 vaccination in children aged 12 to 59 months in health structures in Lomé. *BMC Res*  
44  
45 449 *Notes.* 2019;12(1):1–7.  
46  
47  
48  
49 450 26. Legesse E, Dechasa W. An assessment of child immunization coverage and its  
50  
51 451 determinants in Sinana District , Southeast. ??? [Internet]. 2015;1–14. Available from: ???  
52  
53  
54 452 27. Nour TY, Farah AM, Ali OM, Abate KH. Immunization coverage in Ethiopia among 12 –  
55  
56  
57  
58  
59  
60

- 1  
2  
3 453 23 month old children : systematic review and meta-analysis. 2020;1–12.  
4  
5  
6 454 28. Ethiopian Public Health Institute (EPHI) [Ethiopia] and ICF. 2021. Ethiopia Mini  
7  
8 455 Demographic and Health Survey 2019: Final Report. Rockville, Maryland, USA: EPHI  
9  
10 456 and ICF. Vailable from: <https://dhsprogram.com/pubs/pdf/FR363/FR363.pdf>.  
11  
12  
13 457 29. Ethiopian Public Health Institute (EPHI) and ICF. 2019. Mini Demographic and Health  
14  
15 458 Survey 2019: key Indicators. Rockville, Maryland, USA: EPHI and ICF. 2019. 35 p.  
16  
17  
18 459 30. Bangura JB, Xiao S, Qiu D, Ouyang F, Chen L. Barriers to childhood immunization in  
19  
20 460 sub- Saharan Africa : A systematic review. 2020;20:1108.  
21  
22  
23 461 31. Lakew Y, Bekele A, Biadgilign S. Factors influencing full immunization coverage among  
24  
25 462 12 – 23 months of age children in Ethiopia : evidence from the national demographic and  
26  
27 463 health survey in 2011. BMC Public Health. 2015;15:1–8.  
28  
29  
30 464 32. Girmay A, Dadi AF. Full Immunization Coverage and Associated Factors among Children  
31  
32 465 Aged 12-23 Months in a Hard-to-Reach Areas of Ethiopia. hindawi. 2019;2019:8.  
33  
34  
35 466 33. Ministry of Health-Ethiopia. Health Sector Transformation Plan II (HSTP) (2021-2025).  
36  
37 467 2021.  
38  
39  
40 468 34. Ethiopian Public Health Institute (EPHI) [Ethiopia] and ICFICF. (2019). Ethiopia Mini  
41  
42 469 Demographic and Health Survey: Key Indicators. Rockville, Maryland, USA: EPHI and  
43  
44 470 ICF.  
45  
46  
47  
48 471 35. Gelaye SS, Yenit MK, Baraki AG. Rural Vaccination Coverage Among Children Aged  
49  
50 472 12–23 Months Was Higher Than the Urban Counterparts: A Comparative Cross-Sectional  
51  
52 473 Study in Pawi District, Ethiopia. *Pediatr Heal Med Ther*. 2021;Volume 12:119–27.  
53  
54  
55  
56  
57  
58  
59  
60



1  
2  
3  
4  
5  
6  
7  
8  
9  
10  
11  
12  
13  
14  
15  
16  
17  
18  
19  
20  
21  
22  
23  
24  
25  
26  
27  
28  
29  
30  
31  
32  
33  
34  
35  
36  
37  
38  
39  
40  
41  
42  
43  
44  
45  
46  
47  
48  
49  
50  
51  
52  
53  
54  
55  
56  
57  
58  
59  
60

474 36. Wondimu A, Cao Q, Asuman D, Almansa J, Postma MJ. Understanding the Improvement  
475 in Full Childhood Vaccination Coverage in Ethiopia Using Oaxaca – Blinder  
476 Decomposition Analysis. 2020;1–11.

For peer review only

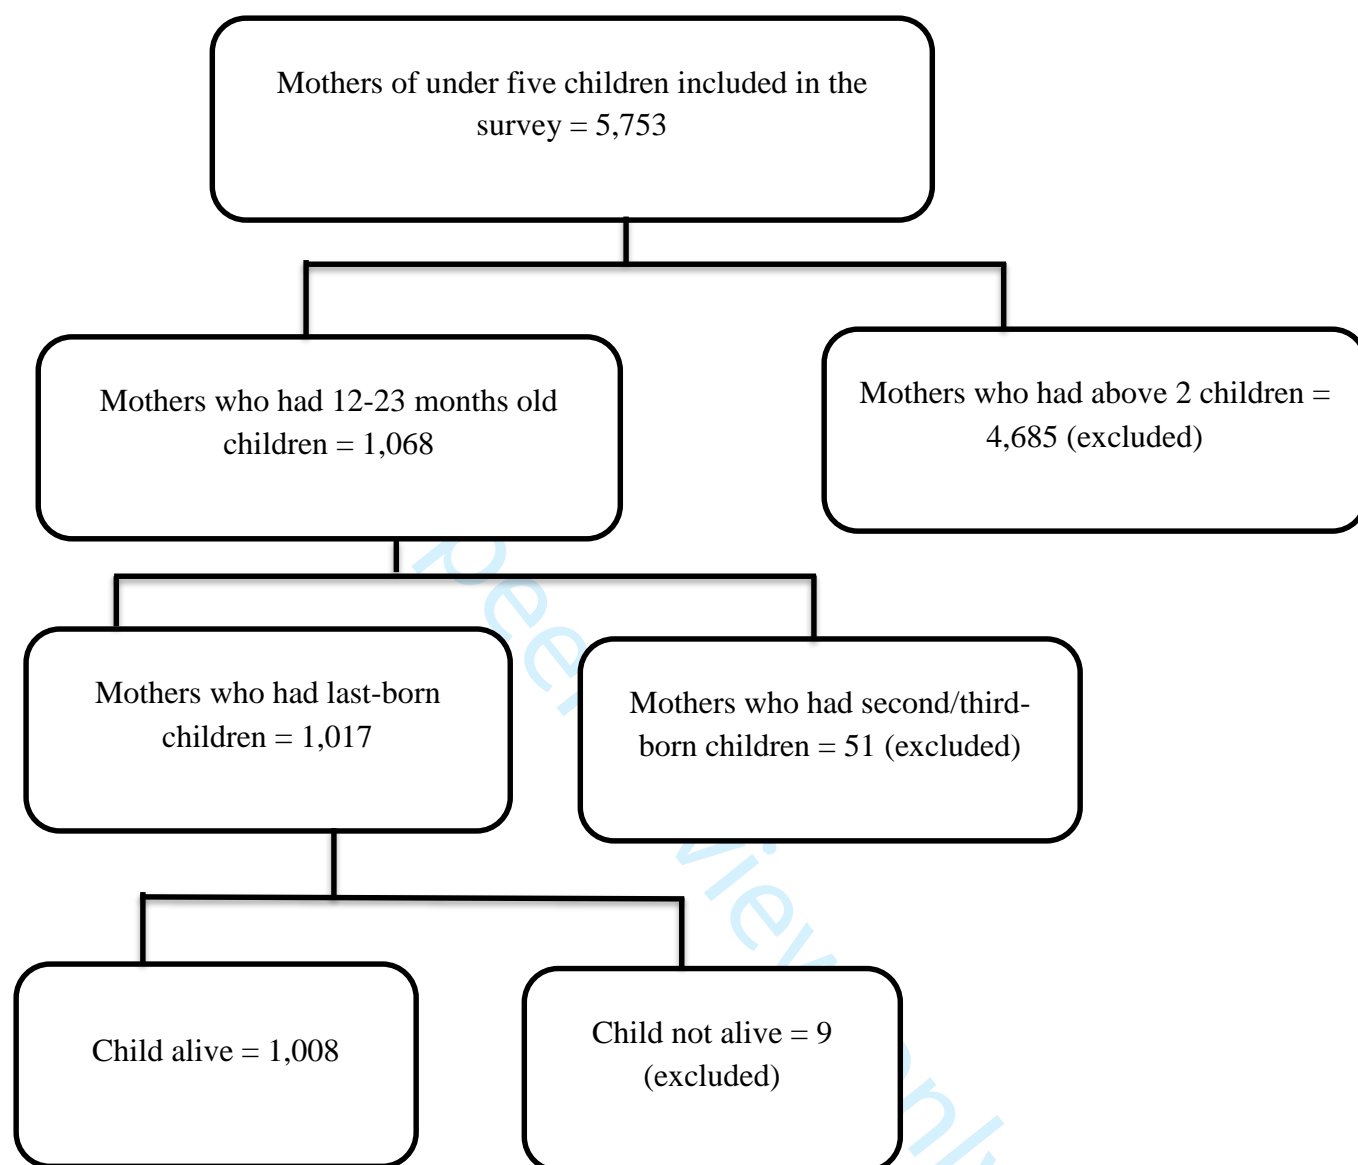

**Fig. 1: Eligibility assessment for childhood vaccination coverage among children aged 12-23 month's in Ethiopia, 2019**

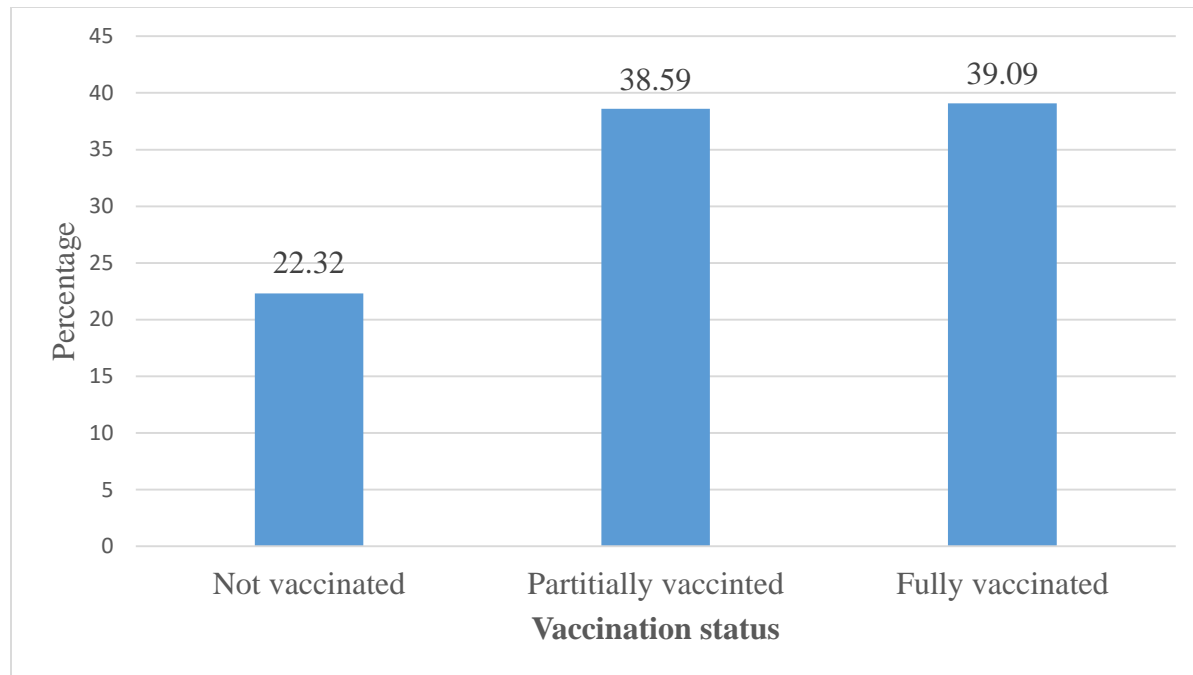

**Fig. 2: Vaccination status of children aged 12-23 months in Ethiopia, 2019**

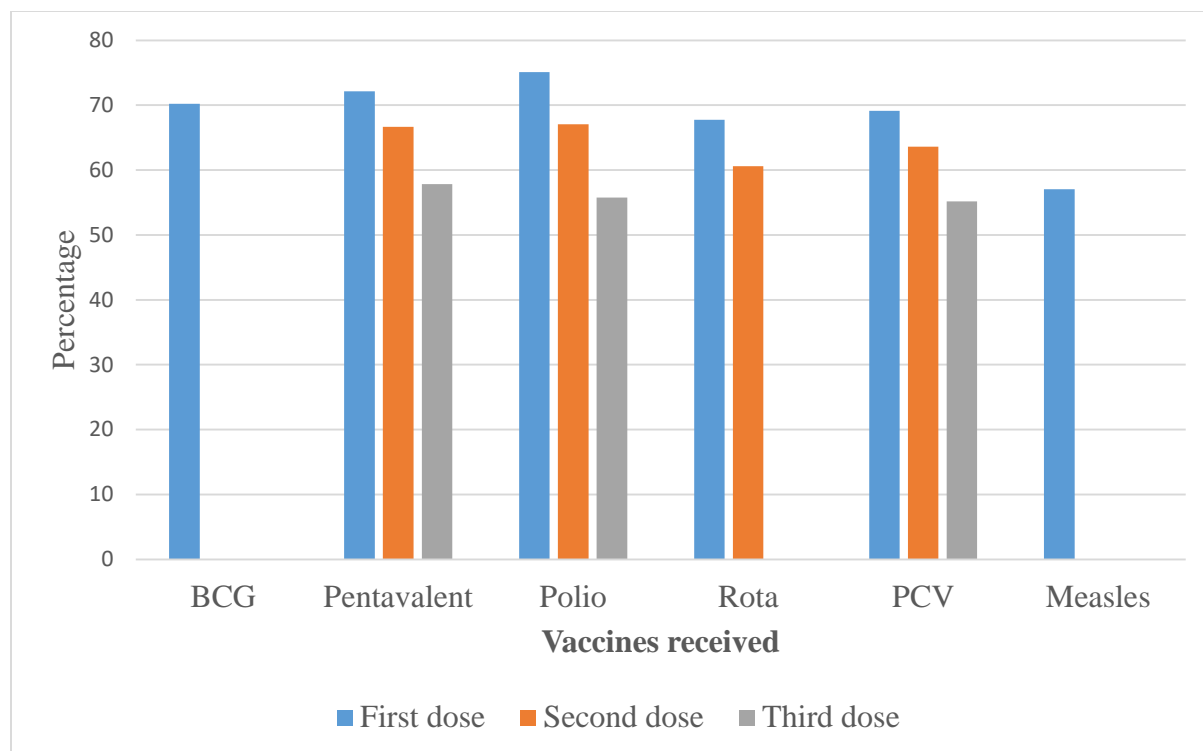

**Fig. 3: Percentage of children aged 12-23 months who received a particular vaccine in Ethiopia, 2019**

**STROBE Statement—Checklist of items that should be included in reports of cross-sectional studies**

|                              | Item No | Recommendation                                                                                                                                                                                               | Reported on page # |
|------------------------------|---------|--------------------------------------------------------------------------------------------------------------------------------------------------------------------------------------------------------------|--------------------|
| <b>Title and abstract</b>    | 1       | (a) Indicate the study's design with a commonly used term in the title or the abstract                                                                                                                       | 1                  |
|                              |         | (b) Provide in the abstract an informative and balanced summary of what was done and what was found                                                                                                          | 2                  |
| <b>Introduction</b>          |         |                                                                                                                                                                                                              |                    |
| Background/rationale         | 2       | Explain the scientific background and rationale for the investigation being reported                                                                                                                         | 4-6                |
| Objectives                   | 3       | State specific objectives, including any prespecified hypotheses                                                                                                                                             | 6                  |
| <b>Methods</b>               |         |                                                                                                                                                                                                              |                    |
| Study design                 | 4       | Present key elements of study design early in the paper                                                                                                                                                      | 7                  |
| Setting                      | 5       | Describe the setting, locations, and relevant dates, including periods of recruitment, exposure, follow-up, and data collection                                                                              | 7                  |
| Participants                 | 6       | (a) Give the eligibility criteria, and the sources and methods of selection of participants                                                                                                                  | 7                  |
| Variables                    | 7       | Clearly define all outcomes, exposures, predictors, potential confounders, and effect modifiers. Give diagnostic criteria, if applicable                                                                     | 8-10               |
| Data sources/<br>measurement | 8*      | For each variable of interest, give sources of data and details of methods of assessment (measurement). Describe comparability of assessment methods if there is more than one group                         | 8-9                |
| Bias                         | 9       | Describe any efforts to address potential sources of bias                                                                                                                                                    | -                  |
| Study size                   | 10      | Explain how the study size was arrived at                                                                                                                                                                    | 8                  |
| Quantitative variables       | 11      | Explain how quantitative variables were handled in the analyses. If applicable, describe which groupings were chosen and why                                                                                 | 10-11              |
| Statistical methods          | 12      | (a) Describe all statistical methods, including those used to control for confounding                                                                                                                        | NA                 |
|                              |         | (b) Describe any methods used to examine subgroups and interactions                                                                                                                                          | NA                 |
|                              |         | (c) Explain how missing data were addressed                                                                                                                                                                  | -                  |
|                              |         | (d) If applicable, describe analytical methods taking account of sampling strategy                                                                                                                           | NA                 |
|                              |         | (e) Describe any sensitivity analyses                                                                                                                                                                        | NA                 |
| <b>Results</b>               |         |                                                                                                                                                                                                              |                    |
| Participants                 | 13*     | (a) Report numbers of individuals at each stage of study—eg numbers potentially eligible, examined for eligibility, confirmed eligible, included in the study, completing follow-up, and analysed            | NA                 |
|                              |         | (b) Give reasons for non-participation at each stage                                                                                                                                                         | NA                 |
|                              |         | (c) Consider use of a flow diagram                                                                                                                                                                           | NA                 |
| Descriptive data             | 14*     | (a) Give characteristics of study participants (eg demographic, clinical, social) and information on exposures and potential confounders                                                                     | 12-16              |
|                              |         | (b) Indicate number of participants with missing data for each variable of interest                                                                                                                          | NA                 |
| Outcome data                 | 15*     | Report numbers of outcome events or summary measures                                                                                                                                                         | 16                 |
| Main results                 | 16      | (a) Give unadjusted estimates and, if applicable, confounder-adjusted estimates and their precision (eg, 95% confidence interval). Make clear which confounders were adjusted for and why they were included | 16-21              |
|                              |         | (b) Report category boundaries when continuous variables were categorized                                                                                                                                    | NA                 |
|                              |         | (c) If relevant, consider translating estimates of relative risk into absolute risk for a meaningful time period                                                                                             | NA                 |
| Other analyses               | 17      | Report other analyses done—eg analyses of subgroups and interactions, and                                                                                                                                    | NA                 |

|                          |    |                                                                                                                                                                            |       |
|--------------------------|----|----------------------------------------------------------------------------------------------------------------------------------------------------------------------------|-------|
|                          |    | sensitivity analyses                                                                                                                                                       |       |
| <b>Discussion</b>        |    |                                                                                                                                                                            |       |
| Key results              | 18 | Summarise key results with reference to study objectives                                                                                                                   | 22    |
| Limitations              | 19 | Discuss limitations of the study, taking into account sources of potential bias or imprecision. Discuss both direction and magnitude of any potential bias                 | 24    |
| Interpretation           | 20 | Give a cautious overall interpretation of results considering objectives, limitations, multiplicity of analyses, results from similar studies, and other relevant evidence | 23-24 |
| Generalisability         | 21 | Discuss the generalisability (external validity) of the study results                                                                                                      | 22-24 |
| <b>Other information</b> |    |                                                                                                                                                                            |       |
| Funding                  | 22 | Give the source of funding and the role of the funders for the present study and, if applicable, for the original study on which the present article is based              | 26    |

For peer review only
